# Supplementary material for: Access to 2-Fluorinated Aziridine-2-phosphonates from α,α-Halofluorinated β-Iminophosphonates—Spectroscopic and Theoretical Studies
Source: MDPI journal article supplement (doi:10.3390/molecules28145579), 2023-07-22
Supplement: s1 [file s1]

## Supporting Informational

### Access to 2-fluorinated aziridine-2-phosphonates from $\alpha,\alpha$ -halofluorinated $\beta$ -iminophosphonates – spectroscopic and theoretical studies

Mateusz Klarek<sup>a</sup>, Tomasz Siodła<sup>a</sup>, Tahar Ayad<sup>b</sup>, David Virieux<sup>b</sup>, Magdalena Rapp<sup>a</sup>

<sup>a</sup> Faculty of Chemistry, Adam Mickiewicz University in Poznan, Poland

<sup>b</sup> ICGM Univ. Montpellier, CNRS, ENSCM, Montpellier, France

#### Table of contents

|                                                                                                                                                                 |           |
|-----------------------------------------------------------------------------------------------------------------------------------------------------------------|-----------|
| <b>I. Spectra of compounds .....</b>                                                                                                                            | <b>3</b>  |
| <i><math>\beta</math>-Enaminophosphonates/ <math>\beta</math>-iminophosphonates 5a/9a,b .....</i>                                                               | <i>3</i>  |
| (Z)-Diethyl (2-((4-methoxyphenyl)amino)-2-phenylvinyl)phosphonate ( <b>Z-5a</b> ) .....                                                                         | 3         |
| (E)-Diethyl (2-((4-methoxyphenyl)imino)-2-phenylethyl)phosphonate ( <b>E-9a</b> ) .....                                                                         | 3         |
| <i><math>\alpha,\alpha</math>-Bromofluoro-<math>\beta</math>-iminophosphonates 10-11a,b, rac-12-13 .....</i>                                                    | <i>5</i>  |
| (E)-Diethyl ((1 <i>R</i> /1 <i>S</i> )-1-bromo-1-fluoro-2-phenyl-2-((( <i>S</i> )-1-phenylethyl)imino)ethyl) phosphonate <b>10a,b</b> .....                     | 5         |
| (E)-Diethyl ((1 <i>S</i> )-1-bromo-1-fluoro-2-phenyl-2-((( <i>S</i> )-1-phenylethyl)imino)ethyl) phosphonate <b>10b</b> .....                                   | 7         |
| (E)-Diethyl ((1 <i>S</i> /1 <i>R</i> )-1-bromo-1-fluoro-2-phenyl-2-((( <i>R</i> )-1-phenylethyl)imino)ethyl) phosphonate <b>11a,b</b> .....                     | 9         |
| rac-(E)-Diethyl ((1 <i>R</i> /1 <i>S</i> )-1-bromo-1-fluoro-2-((4-methoxybenzyl)imino)-2-phenylethyl)phosphonate rac- <b>12</b> .....                           | 11        |
| rac-(E)-Diethyl ((1 <i>R</i> /1 <i>S</i> )-1-bromo-1-fluoro-2-((4-methoxyphenyl)imino)-2-phenylethyl)phosphonate rac- <b>13</b> .....                           | 13        |
| <i><math>\alpha,\alpha</math>-Chlorofluoro-<math>\beta</math>-iminophosphonates 14a,b, rac-15 .....</i>                                                         | <i>15</i> |
| (E)-Diethyl ((1 <i>R</i> /1 <i>S</i> )-1-chloro-1-fluoro-2-phenyl-2-((( <i>S</i> )-1-phenylethyl)imino)ethyl)phosphonate <b>14a,b</b> .....                     | 15        |
| rac-(E)-Diethyl (1 <i>R</i> /1 <i>S</i> )-1-chloro-1-fluoro-2-((4-methoxybenzyl)imino)-2-phenylethyl)phosphonate rac- <b>15</b> .....                           | 19        |
| <i><math>\alpha,\alpha</math>-Bromofluoro-<math>\beta</math>-aminophosphonates 16-17a-d, rac-18-19a,b .....</i>                                                 | <i>21</i> |
| Diethyl ((1 <i>S</i> / <i>R</i> , 2 <i>S</i> / <i>R</i> )-1-bromo-1-fluoro-2-phenyl-2-((( <i>S</i> )-1-phenylethyl)amino)ethyl)phosphonate <b>16a-d</b> .....   | 21        |
| Diethyl ((1 <i>S</i> /1 <i>R</i> , 2 <i>S</i> /2 <i>R</i> )-1-bromo-1-fluoro-2-phenyl-2-((( <i>R</i> )-1-phenylethyl)amino)ethyl)phosphonate <b>17a-d</b> ..... | 23        |
| rac-Diethyl ((1 <i>R</i> /1 <i>S</i> , 2 <i>R</i> /2 <i>S</i> )-1-bromo-1-fluoro-2-((4-methoxybenzyl)amino)-2-phenylethyl)phosphonate rac- <b>18a,b</b> .....   | 26        |

|                                                                                                                                                                 |           |
|-----------------------------------------------------------------------------------------------------------------------------------------------------------------|-----------|
| rac-Diethyl ((1 <i>R</i> /1 <i>S</i> , 2 <i>R</i> /2 <i>S</i> )-1-bromo-1-fluoro-2-((4-methoxyphenyl)amino)-2-phenylethyl)phosphonate <b>rac-19a,b</b> .....    | 28        |
| <i>α,α</i> -Chlorofluoro- <i>β</i> -iminophosphonates <b>20a-d, rac-21a,b</b> .....                                                                             | 30        |
| Diethyl((1 <i>S</i> /1 <i>R</i> , 2 <i>S</i> /2 <i>R</i> )-1-chloro-1-fluoro-2-phenyl-2-((( <i>S</i> )-1-phenylethyl)amino)ethyl)phosphonate <b>20a-d</b> ..... | 30        |
| rac-Diethyl ((1 <i>S</i> /1 <i>R</i> , 2 <i>S</i> /2 <i>R</i> )-)-1-chloro-1-fluoro-2-((4-methoxybenzyl)amino)-2-phenylethyl)phosphonate <b>rac-21a,b</b> ..... | 32        |
| <i>α</i> -Fluorinated <i>β</i> -enaminophosphonate/ <i>β</i> -iminophosphonate <b>22a,b/23a,b</b> .....                                                         | 34        |
| ( <i>Z</i> )-Diethyl(1-fluoro-2-phenyl-2-((( <i>S</i> )-1-phenylethyl)amino)vinyl)phosphonate <b>22a</b> .....                                                  | 34        |
| 2-Fluorinated aziridine-2-phosphonates <b>24a-d, rac-25-26a,b</b> .....                                                                                         | 36        |
| Diethyl ((2 <i>S</i> /2 <i>R</i> , 3 <i>R</i> /3 <i>S</i> )-2-fluoro-3-phenyl-1-((( <i>S</i> )-1-phenylethyl)aziridin-2-yl)phosphonate <b>24a-d</b> .....       | 36        |
| Diethyl ((2 <i>R</i> ,3 <i>R</i> )-2-fluoro-3-phenyl-1-((( <i>S</i> )-1-phenylethyl)aziridin-2-yl)phosphonate ( <b>trans-24b</b> ) .....                        | 40        |
| rac-Diethyl ((2 <i>S</i> /2 <i>R</i> , 3 <i>R</i> /3 <i>S</i> )-2-fluoro-1-(4-methoxybenzyl)-3-phenylaziridin-2-yl)phosphonate <b>rac-25a,b</b> .....           | 44        |
| rac-Diethyl ((2 <i>R</i> ,3 <i>R</i> )-2-fluoro-1-(4-methoxybenzyl)-3-phenylaziridin-2-yl)phosphonate <b>rac-trans-25b</b> .....                                | 48        |
| rac-Diethyl ((2 <i>S</i> /2 <i>R</i> , 3 <i>R</i> /3 <i>S</i> )-2-fluoro-1-(4-methoxyphenyl)-3-phenylaziridin-2-yl)phosphonate <b>rac-trans-26a,b</b> .....     | 53        |
| Non-fluorinated aziridine-2-phosphonate <b>cis-27</b> .....                                                                                                     | 56        |
| Diethyl ((2 <i>S</i> ,3 <i>R</i> )-3-phenyl-1-((( <i>S</i> )-1-phenylethyl)aziridin-2-yl)phosphonate <b>cis-27</b> .....                                        | 56        |
| <i>α</i> -Fluorinated <i>β</i> -aminophosphonate <b>28a-d</b> .....                                                                                             | 60        |
| Diethyl ((1 <i>S</i> / <i>R</i> , 2 <i>S</i> / <i>R</i> )-1-fluoro-2-phenyl-2-((( <i>S</i> )-1-phenylethyl)amino)ethyl)phosphonate <b>28a-d</b> .....           | 60        |
| Aziridine ring opening product <b>29a,b</b> .....                                                                                                               | 62        |
| Diethyl ((1 <i>R</i> /1 <i>S</i> , 2 <i>S</i> )-1,2-dimethoxy-2-phenyl-1-((( <i>S</i> )-1-phenylethyl)amino)ethyl)phosphonate <b>29a,b</b> .....                | 62        |
| <b>II. NMR table</b> .....                                                                                                                                      | <b>65</b> |
| <b>III. Geometries optimization – theoretical data</b> .....                                                                                                    | <b>66</b> |

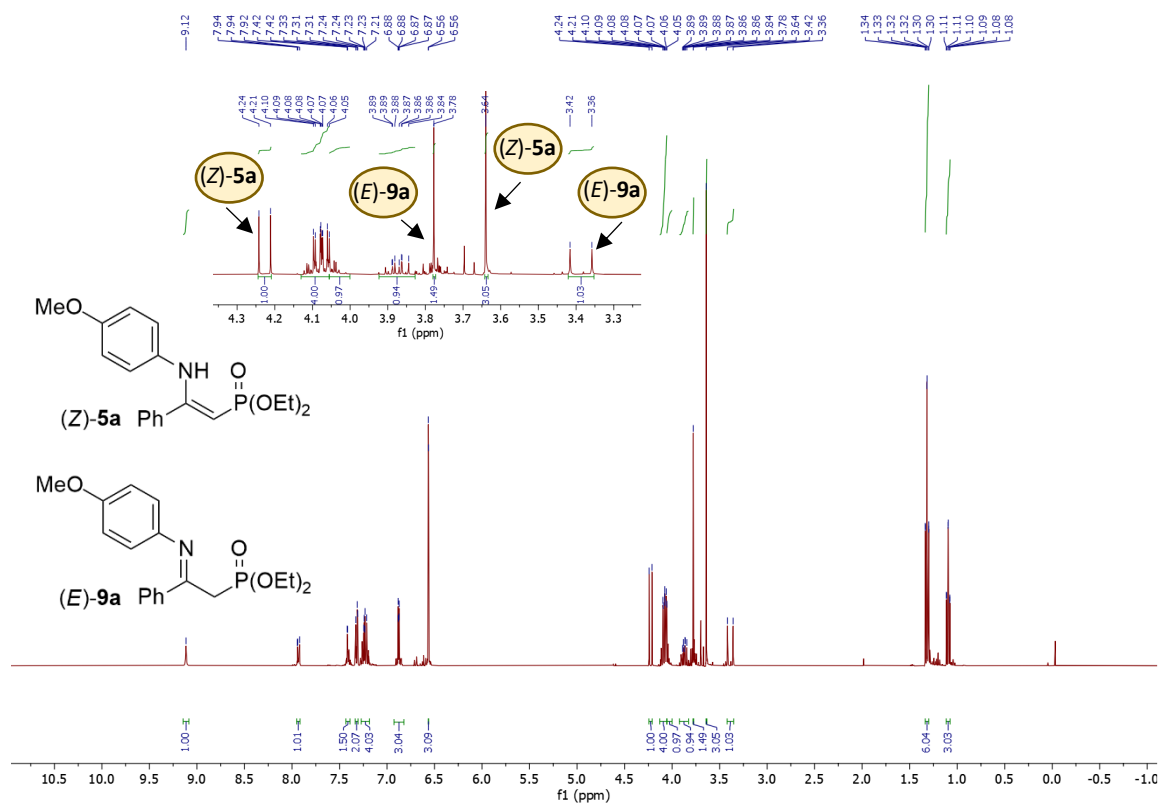

$^1\text{H}$  NMR of enamine (**5a**)/imines (**9a,b**), ratio 1:0.53. (*E*)-**9a**/*Z*-**9b** ratio 1:0.08.

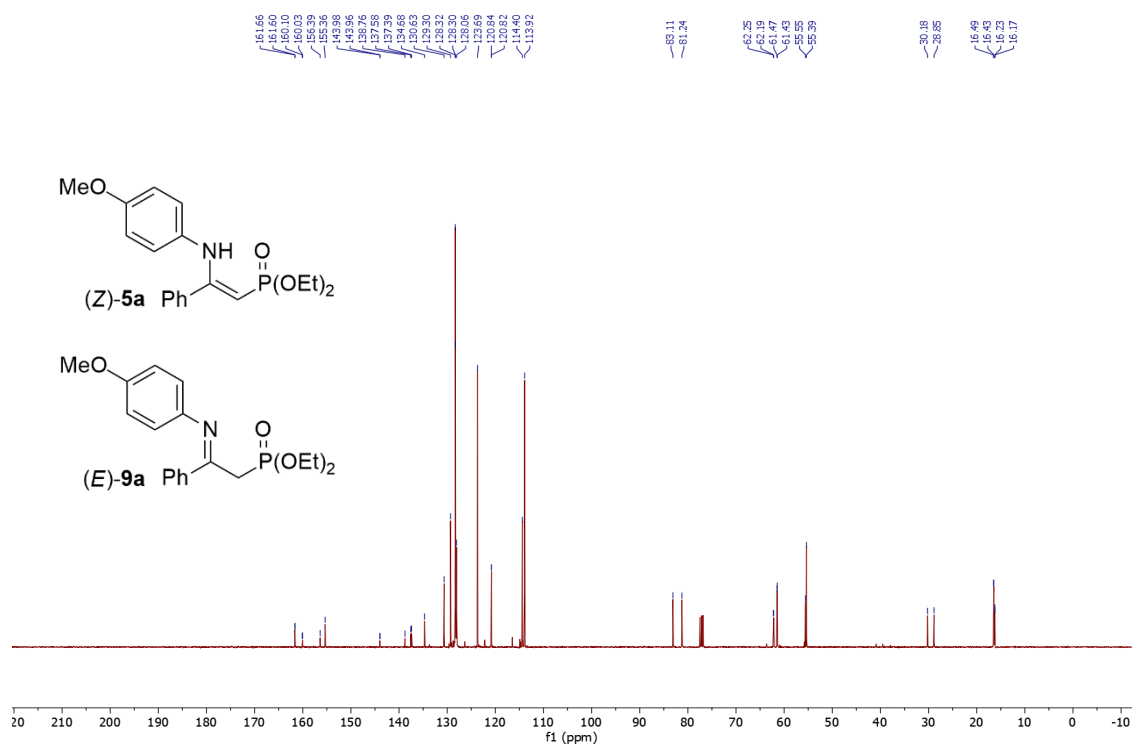

$^{13}\text{C}$  NMR of enamine (**5a**)/imines (**9a,b**), ratio 1:0.53. (*E*)-**9a**/*Z*-**9b** ratio 1:0.08.

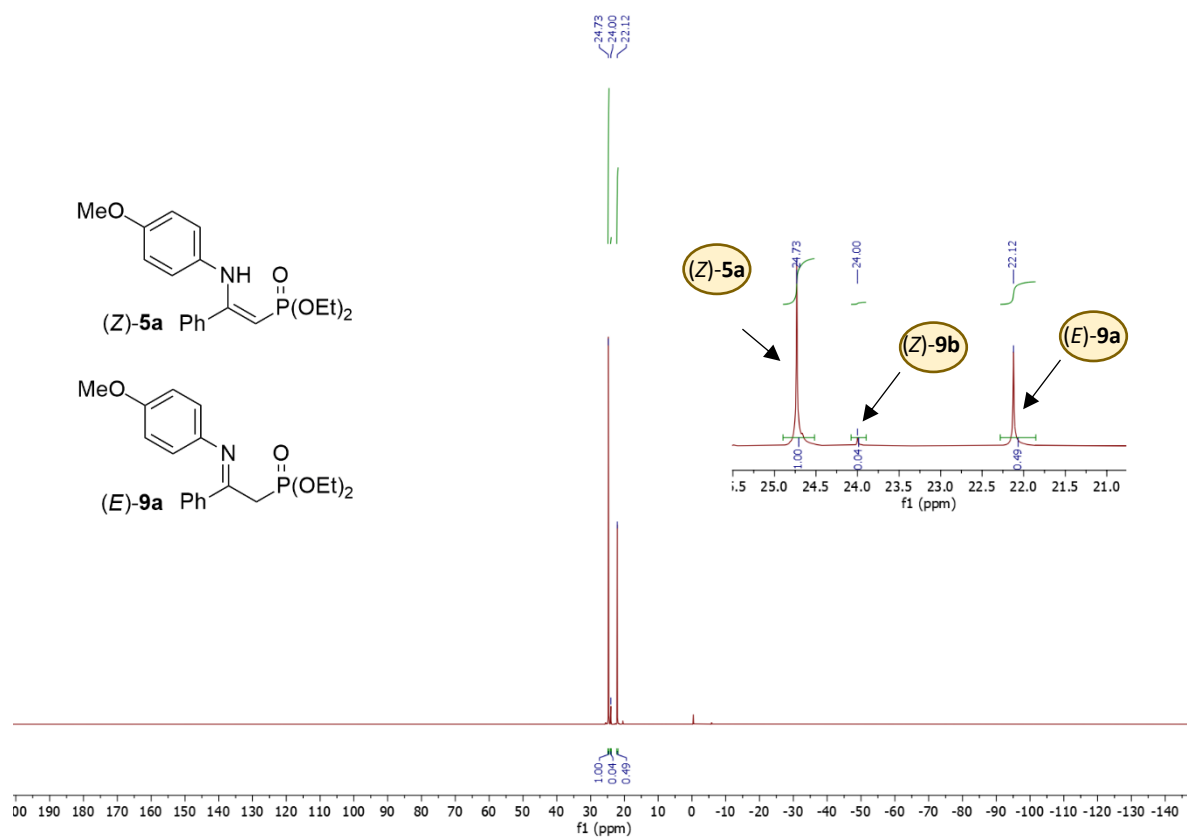

<sup>31</sup>P{<sup>1</sup>H} NMR of enamine (**5a**)/imines (**9a,b**), ratio 1:0.53. (E)-**9a**/(Z)-**9b** ratio 1:0.08.



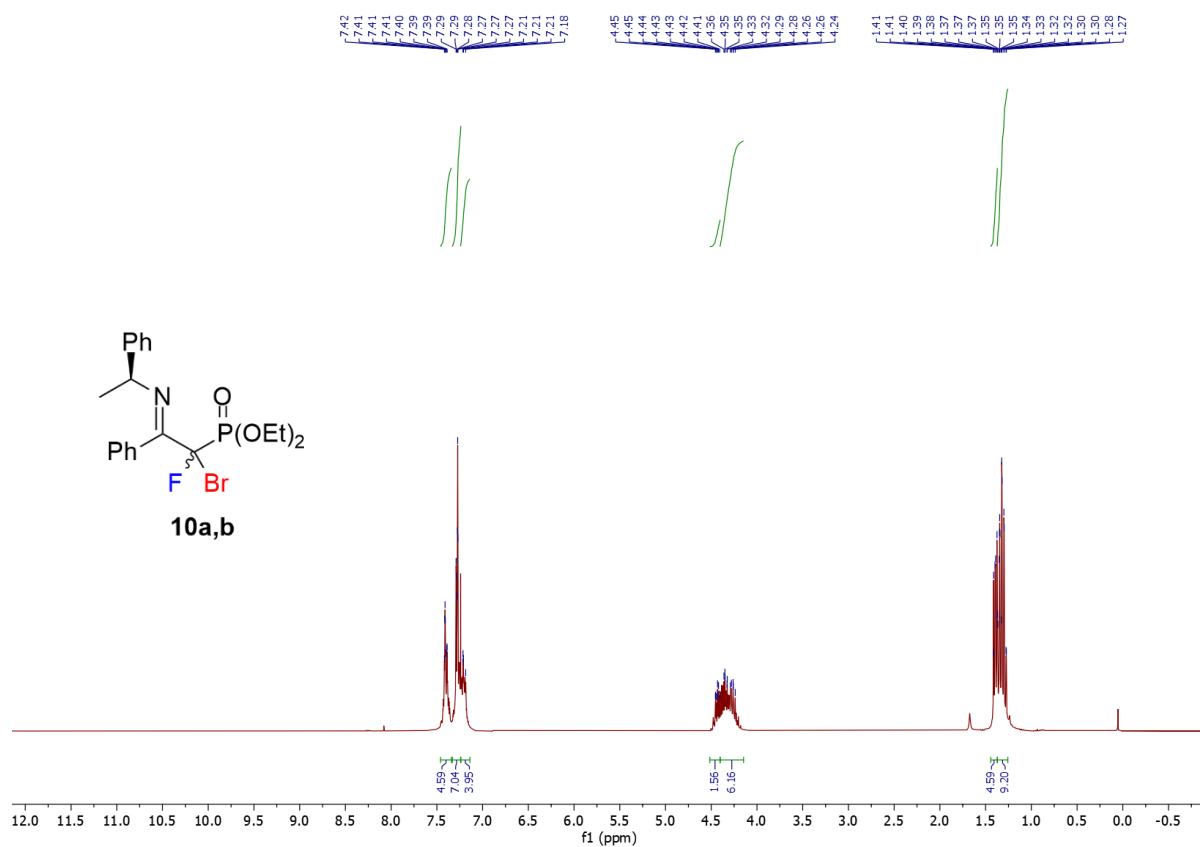

<sup>1</sup>H NMR of **10a,b** *dr* = 1:0.54

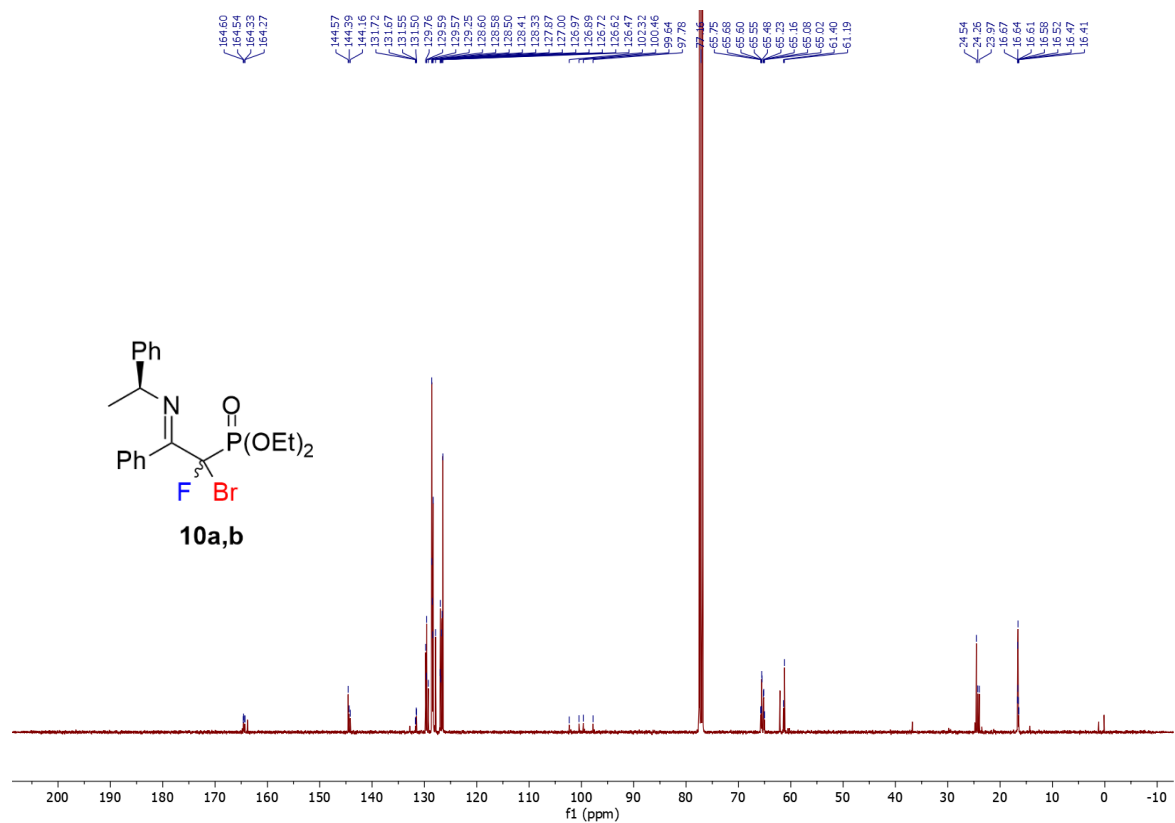

<sup>13</sup>C NMR of **10a,b** *dr* = 1:0.54.

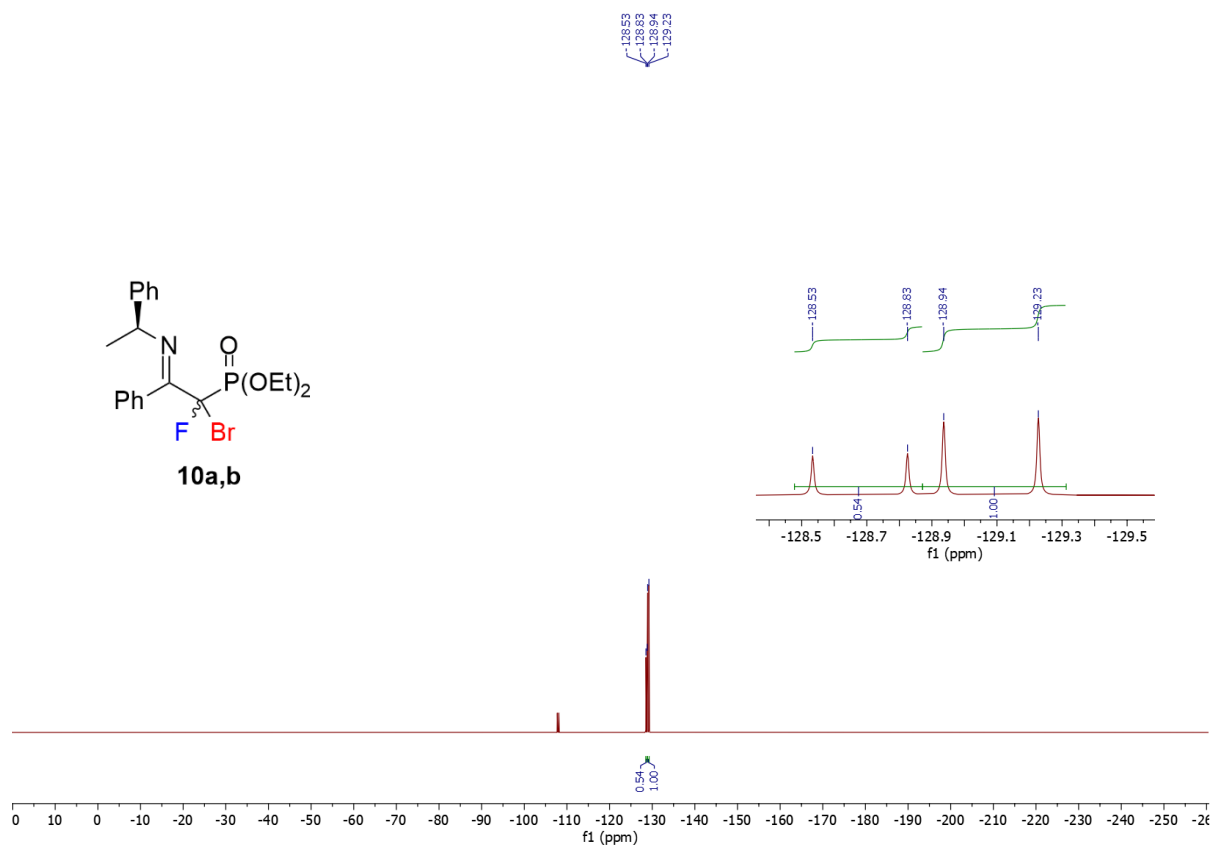

$^{19}\text{F}$  NMR of **10a,b**  $dr = 1:0.54$ .

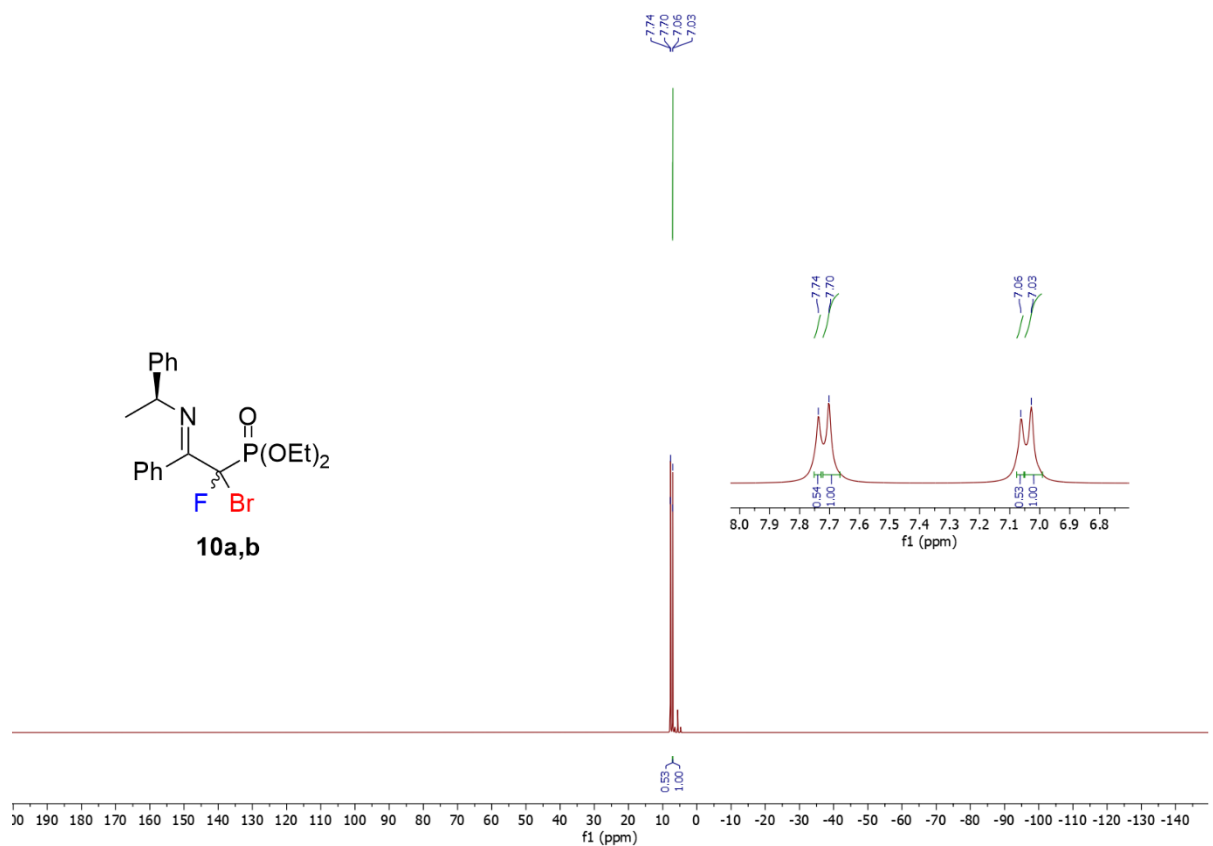

$^{31}\text{P}\{^1\text{H}\}$  NMR of **10a,b**  $dr = 1:0.54$ .

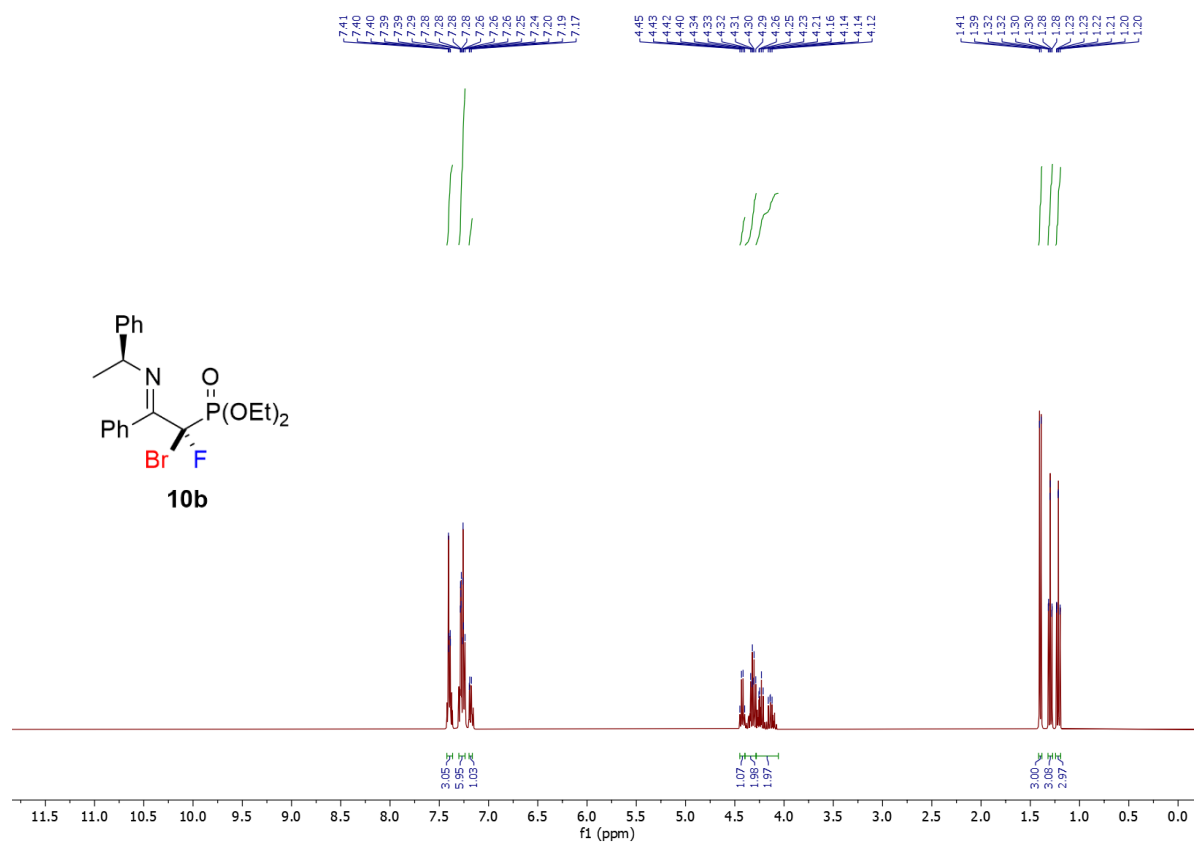

**<sup>1</sup>H NMR of 10b**

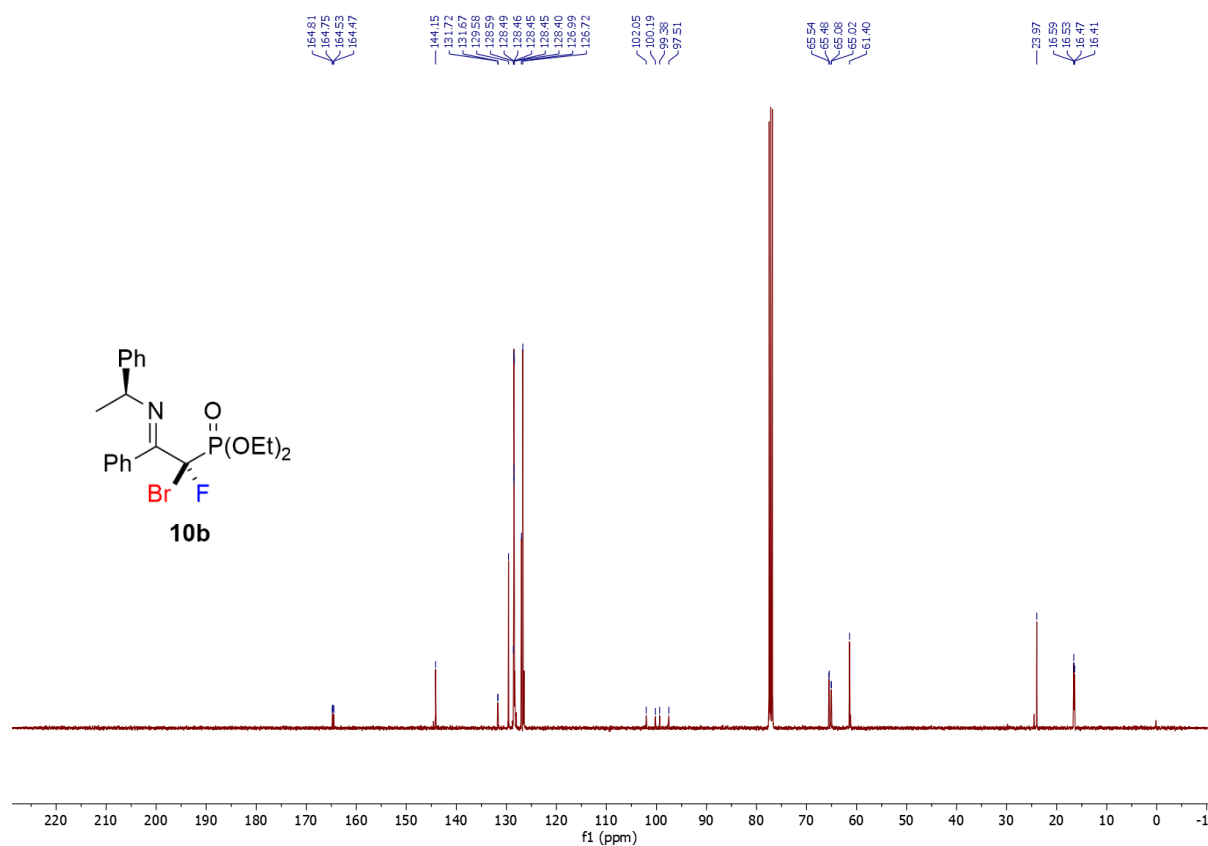

**<sup>13</sup>C NMR of 10b**

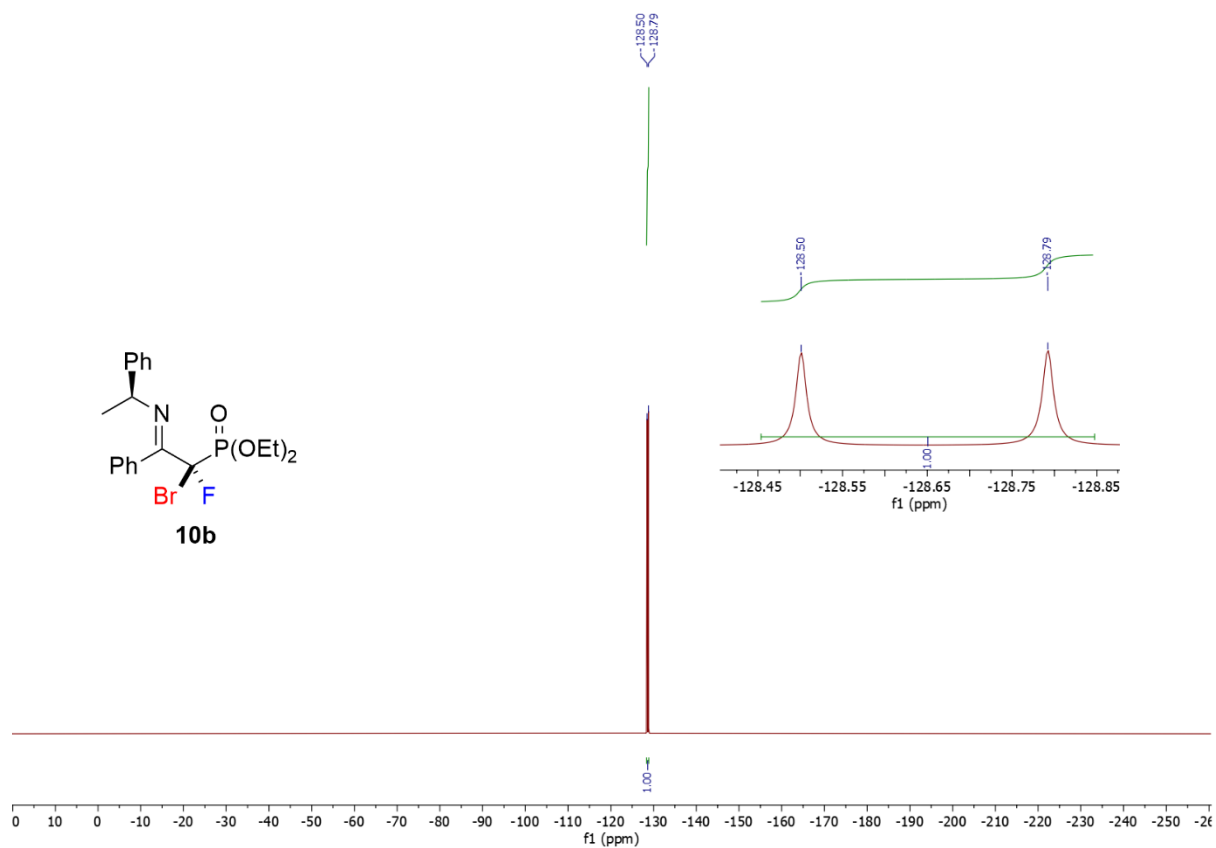

**<sup>19</sup>F NMR of 10b**

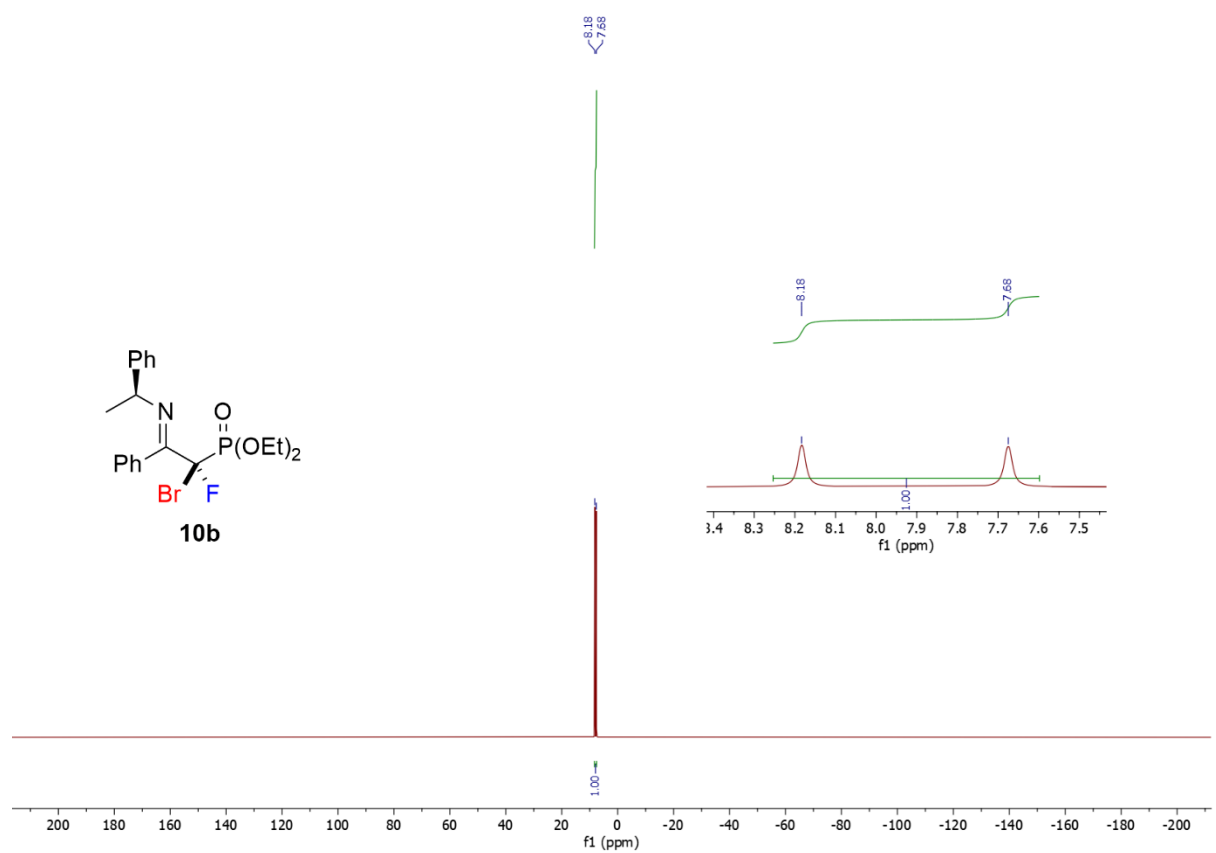

**<sup>31</sup>P{<sup>1</sup>H} NMR of 10b**



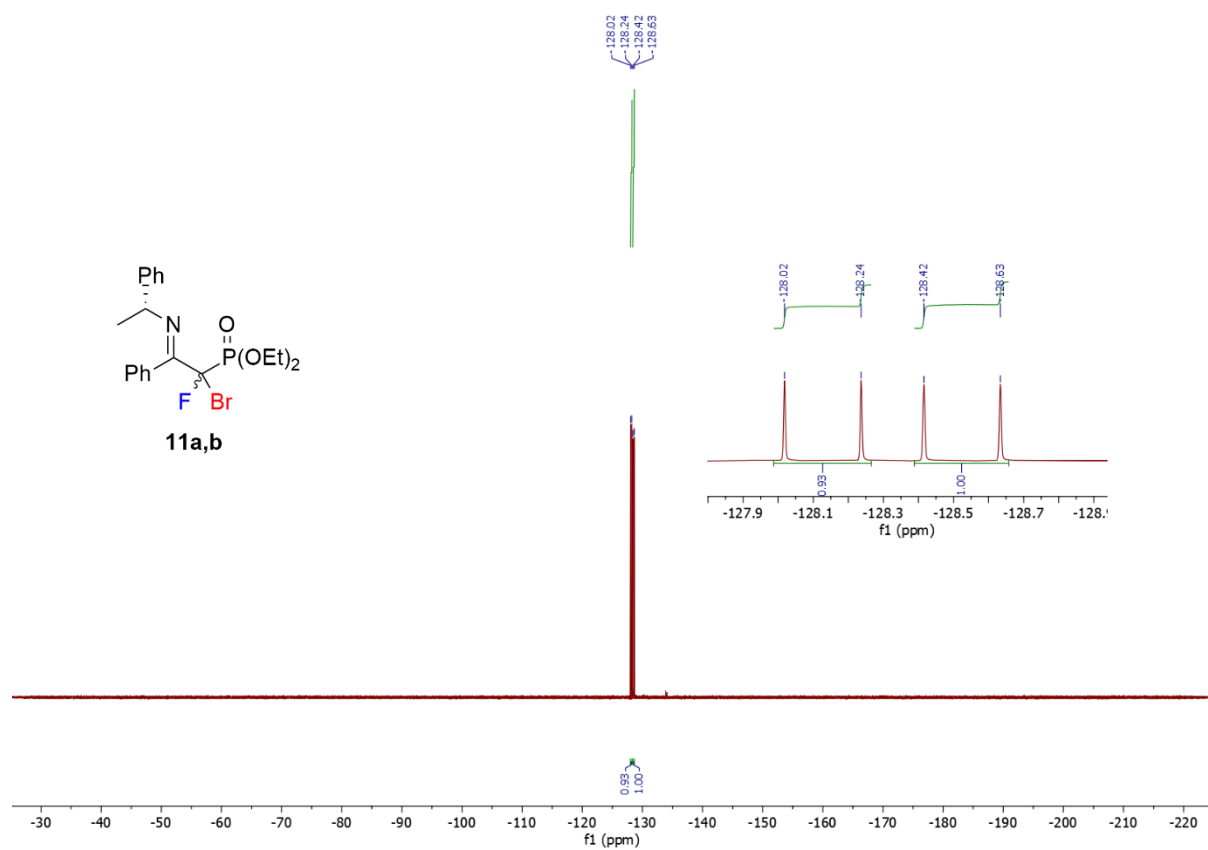

$^{19}\text{F}$  NMR of **11a,b**  $dr = 1:0.93$ .

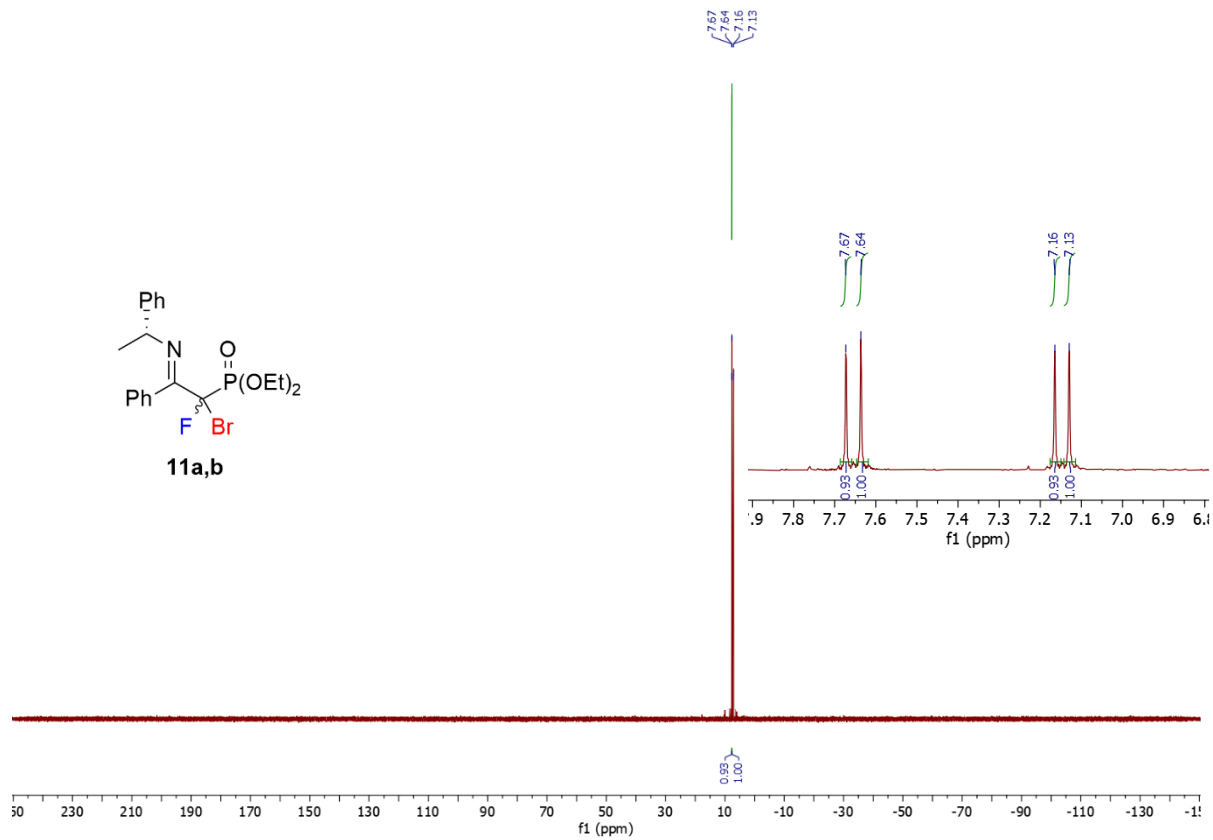

$^{31}\text{P}\{^1\text{H}\}$  NMR of **11a,b**  $dr = 1:0.93$ .

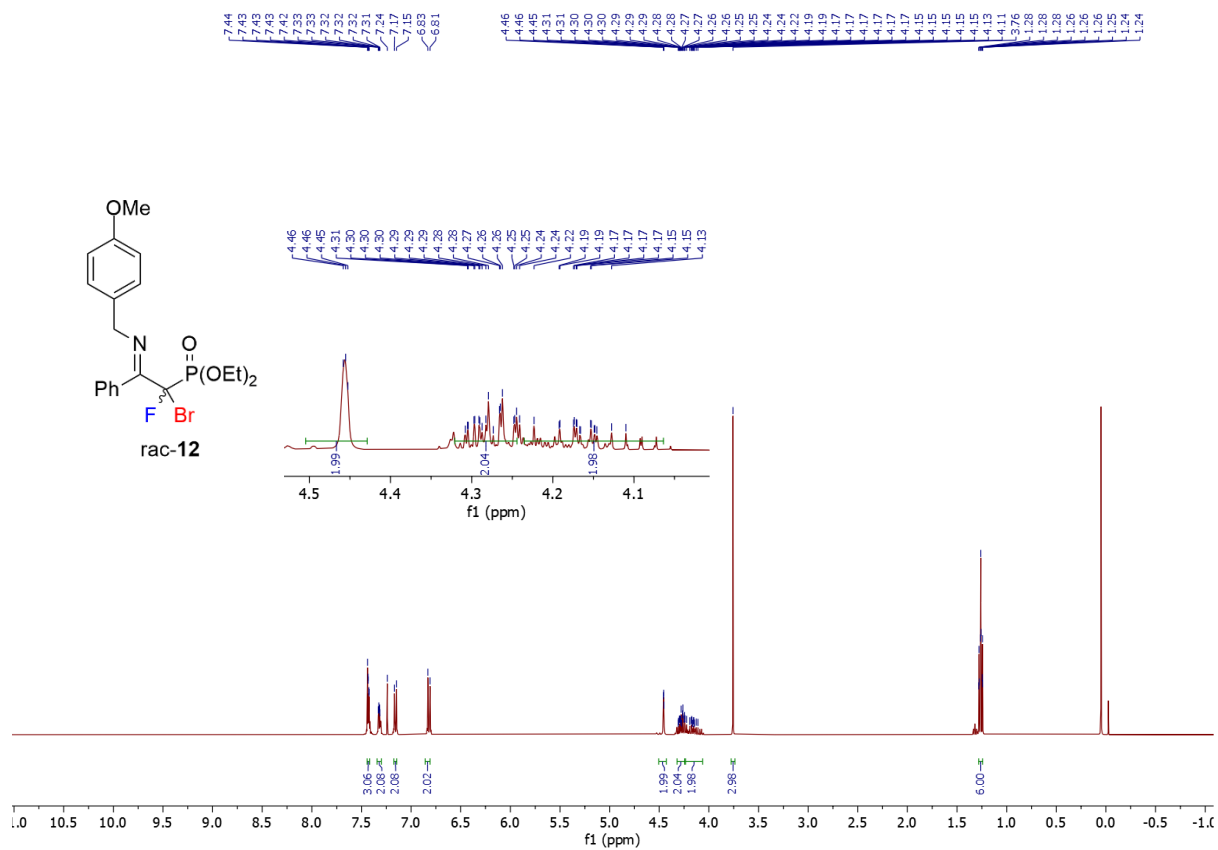

<sup>1</sup>H NMR of **rac-12**

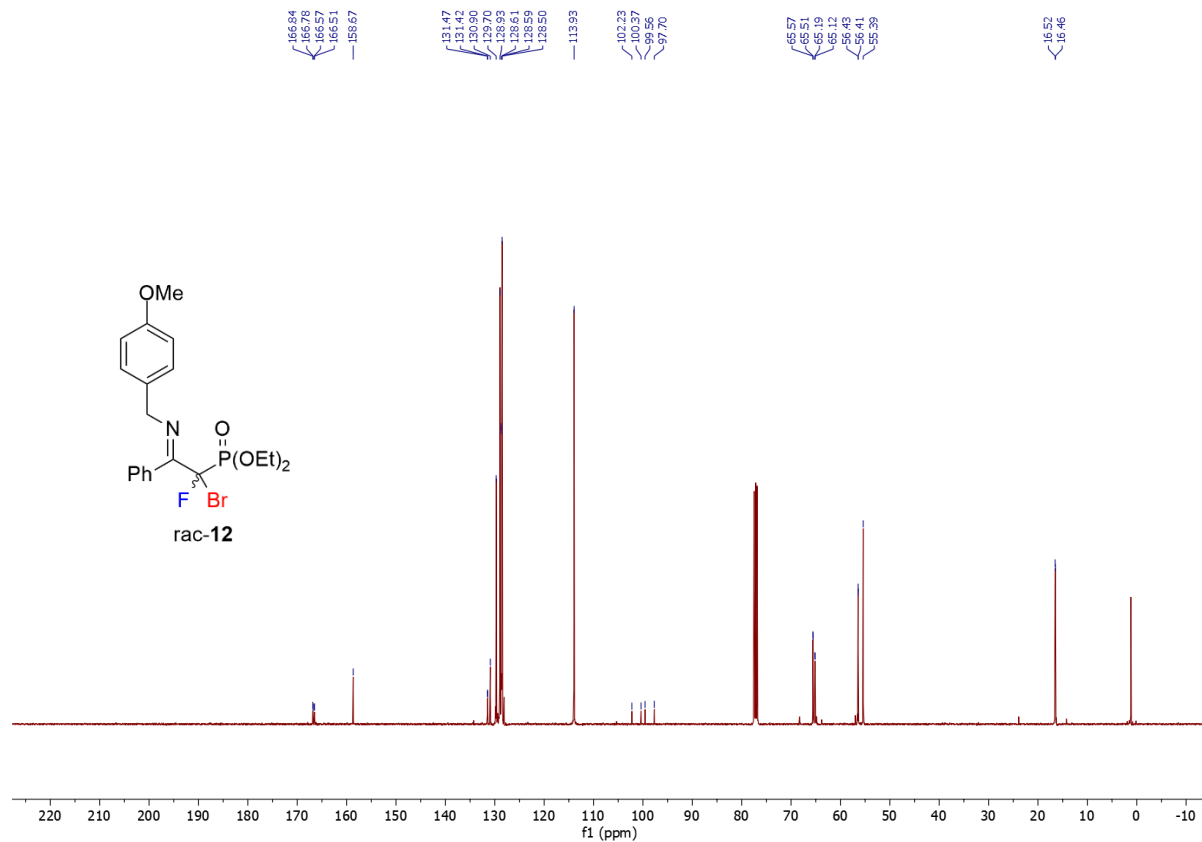

<sup>13</sup>C NMR of **rac-12**

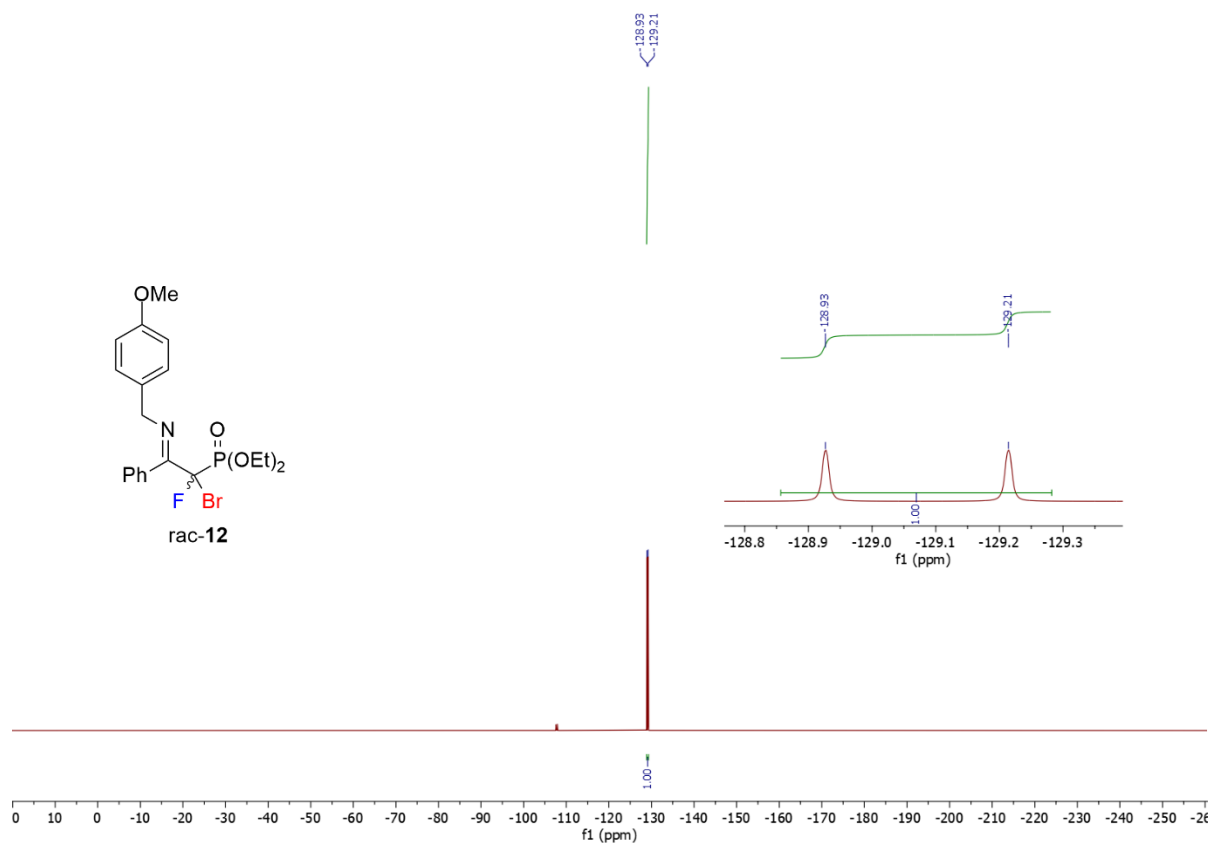

$^{19}\text{F}$  NMR of **rac-12**

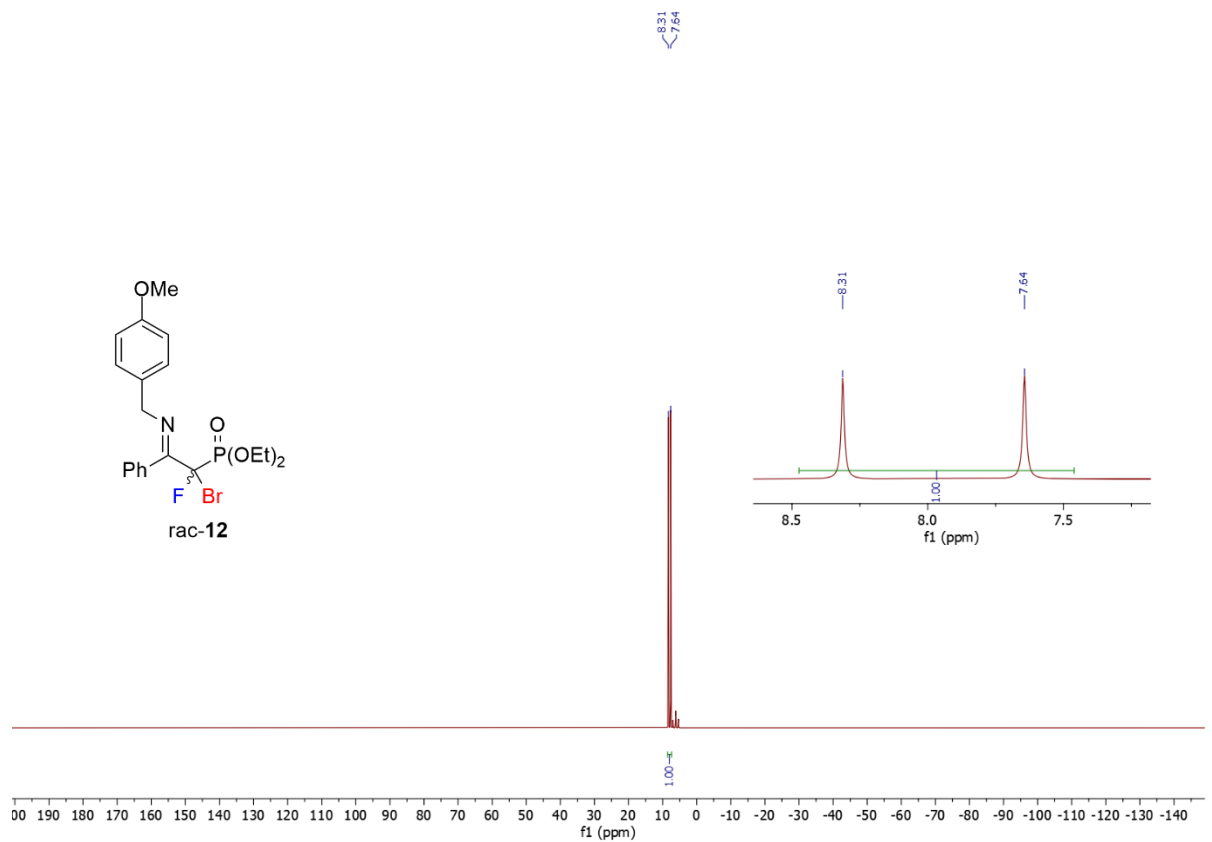

$^{31}\text{P}\{^1\text{H}\}$  NMR of **rac-12**



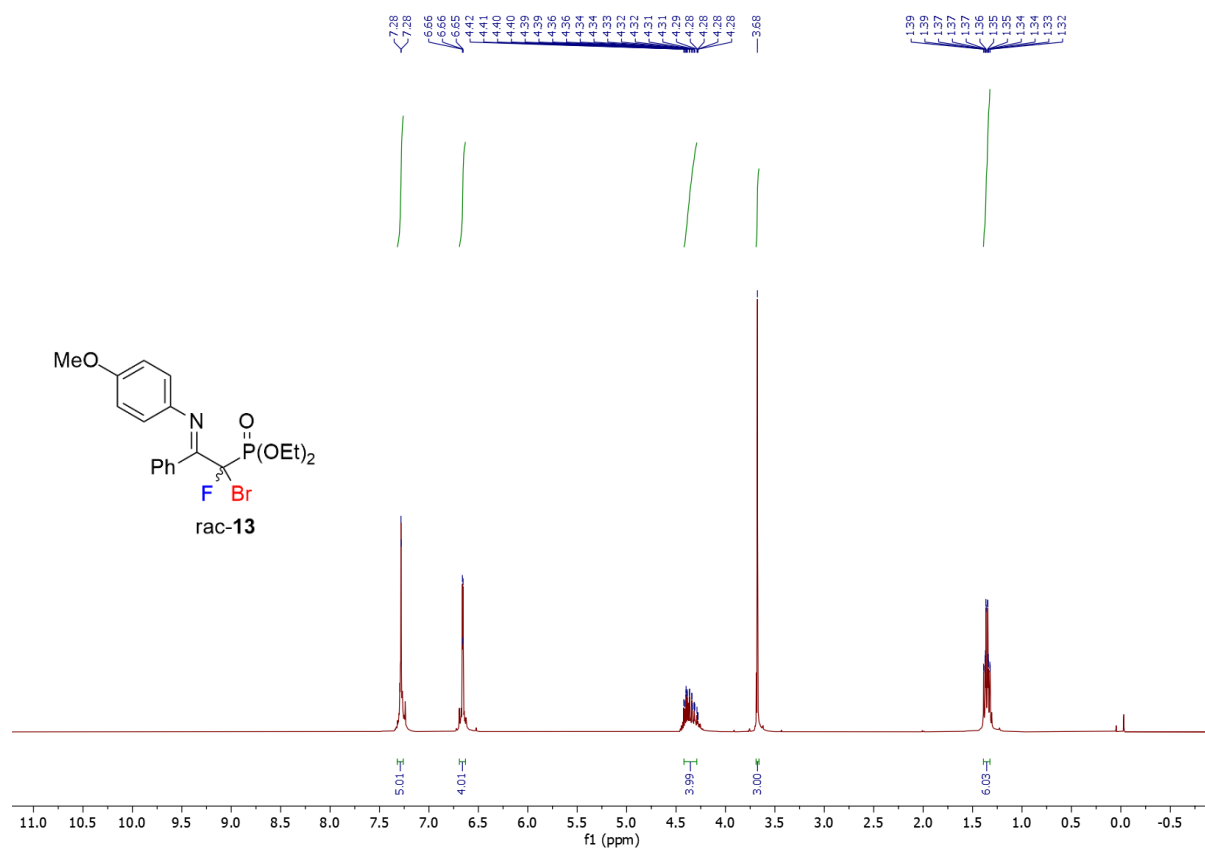

$^1\text{H}$  NMR of **rac-13**

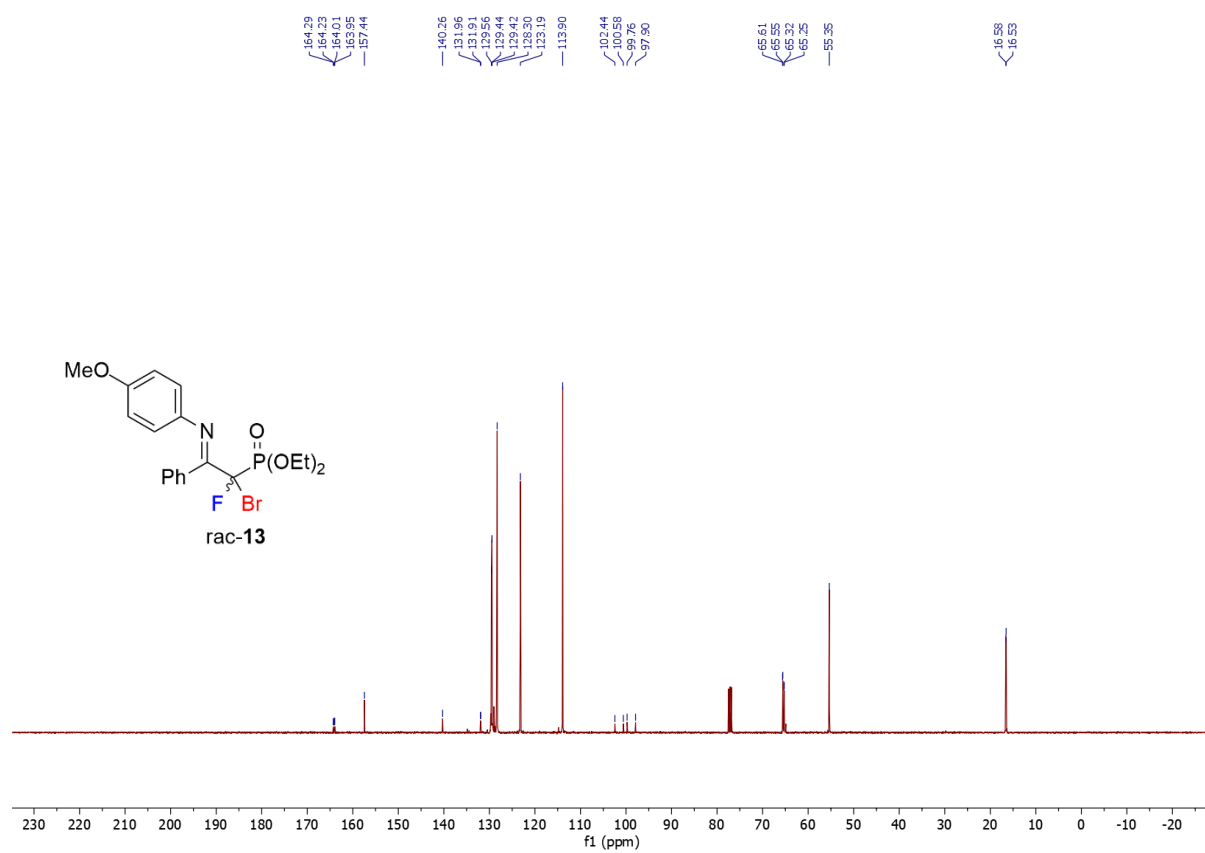

$^{13}\text{C}$  NMR of **rac-13**

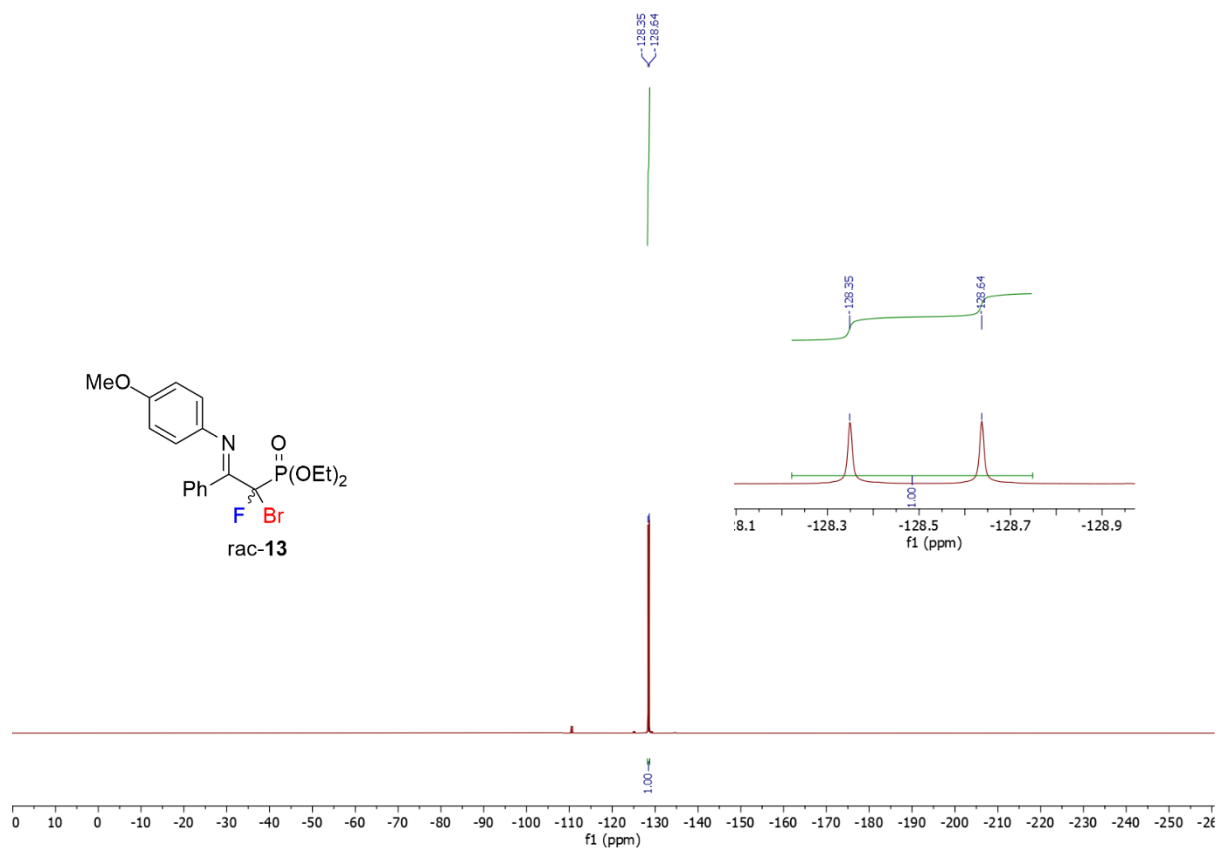

<sup>19</sup>F NMR of **rac-13**

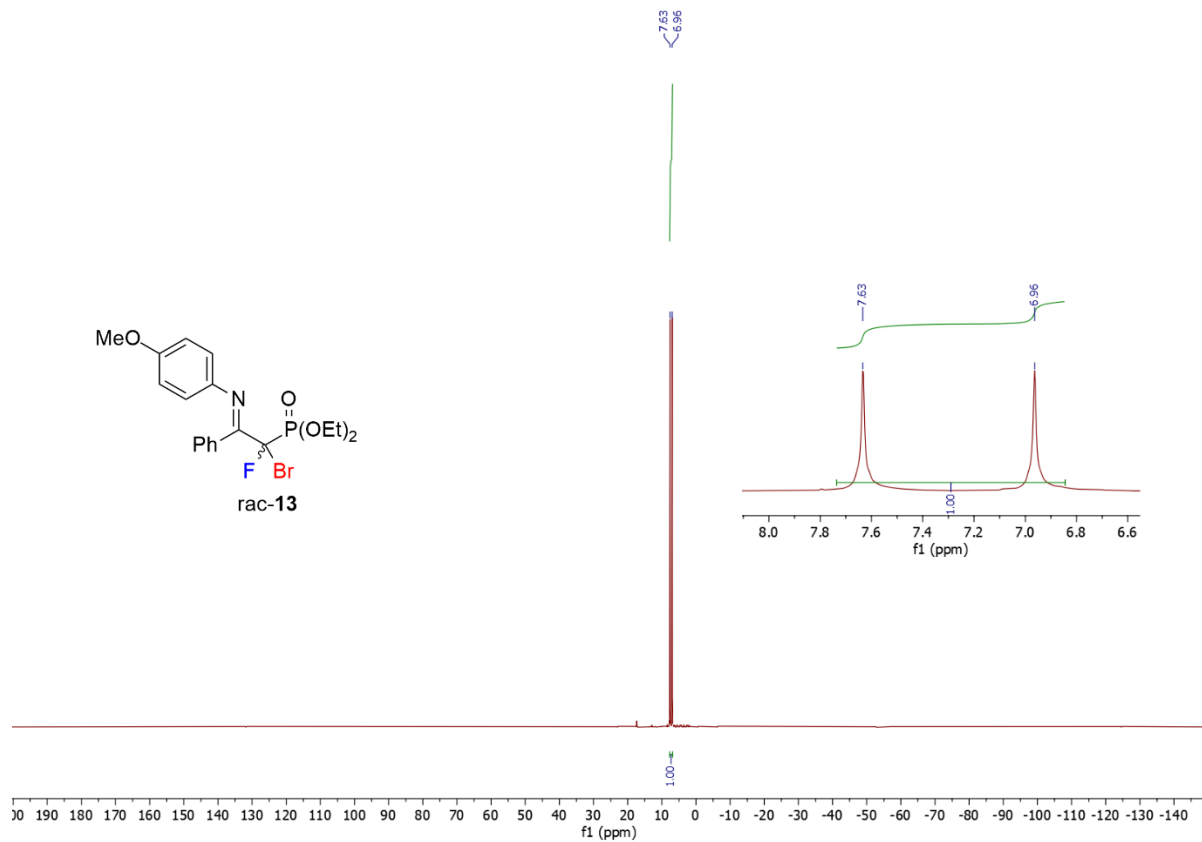

<sup>31</sup>P {<sup>1</sup>H} NMR of **rac-13**

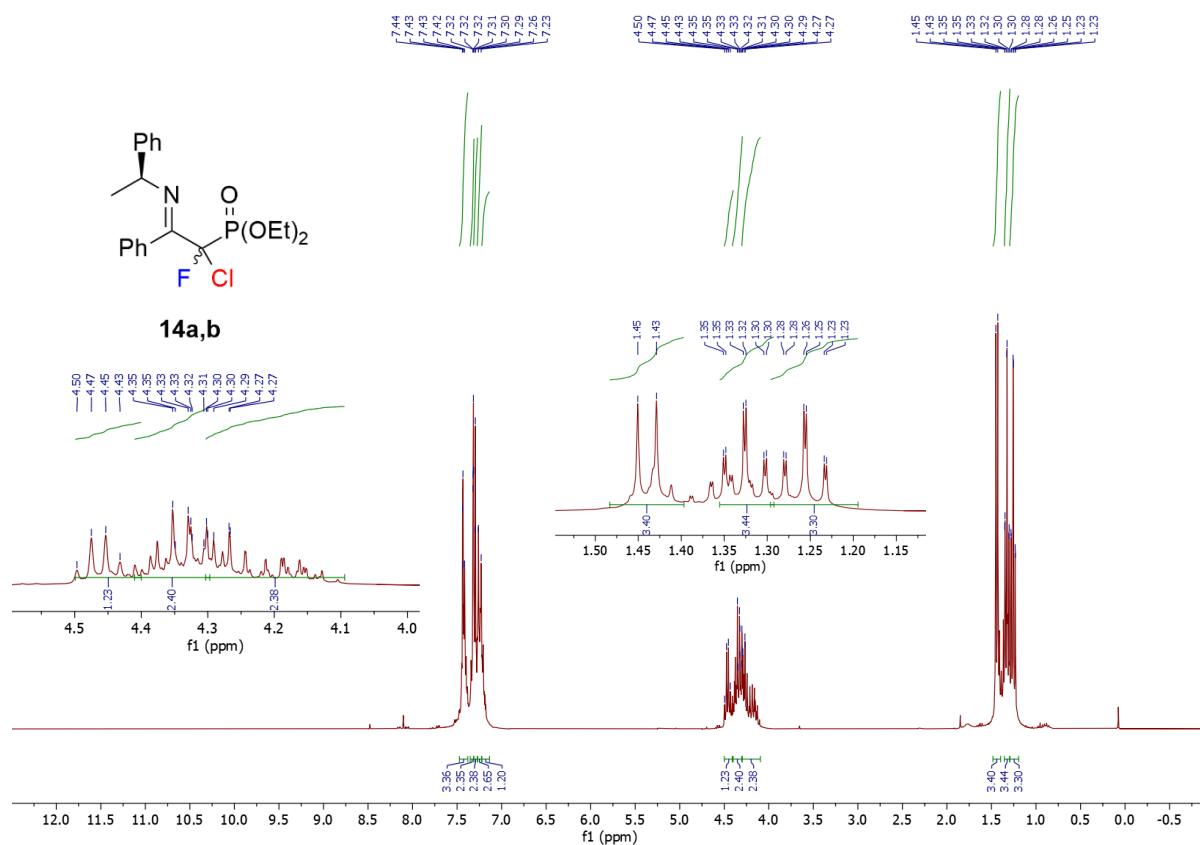

<sup>1</sup>H NMR of **14a,b** *dr* = 0.2:1

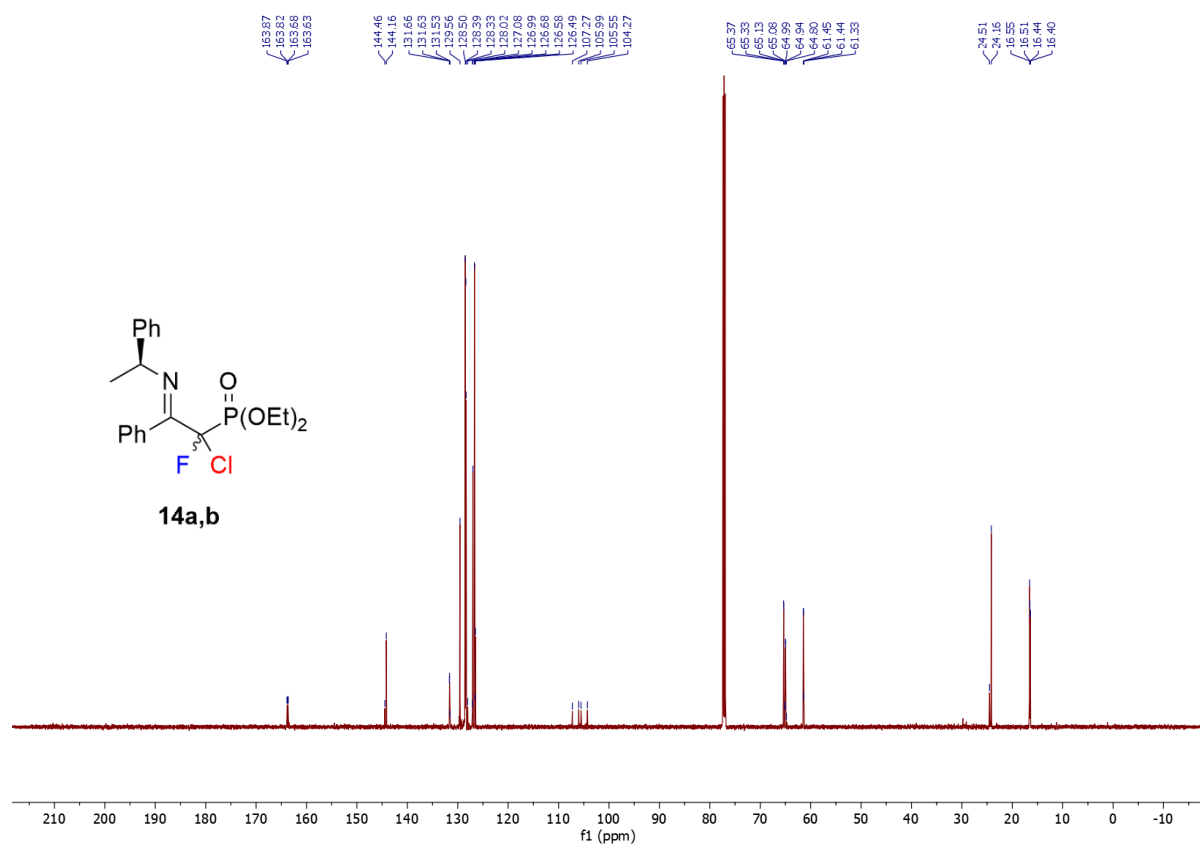

<sup>13</sup>C NMR of **14a,b** *dr* = 0.2:1

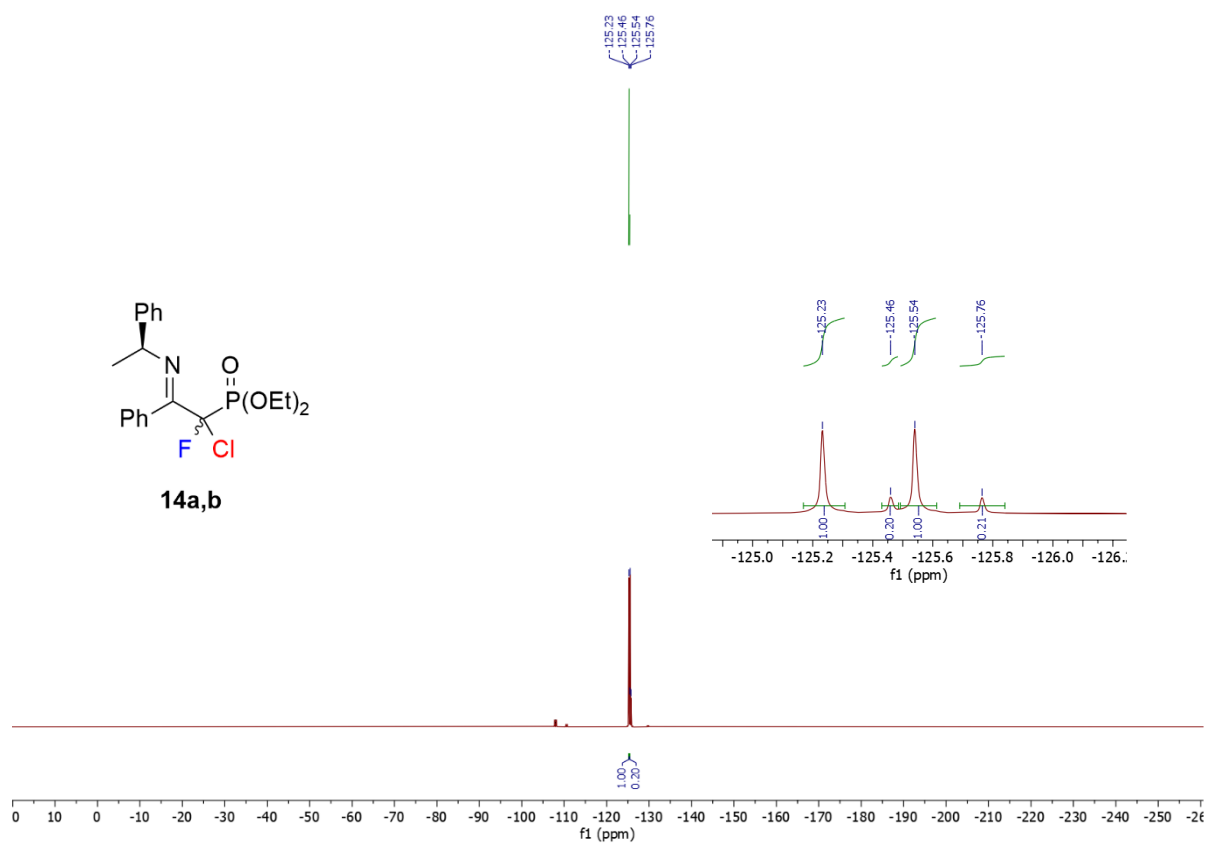

$^{19}\text{F}$  NMR of **14a,b**  $dr = 0.2:1$

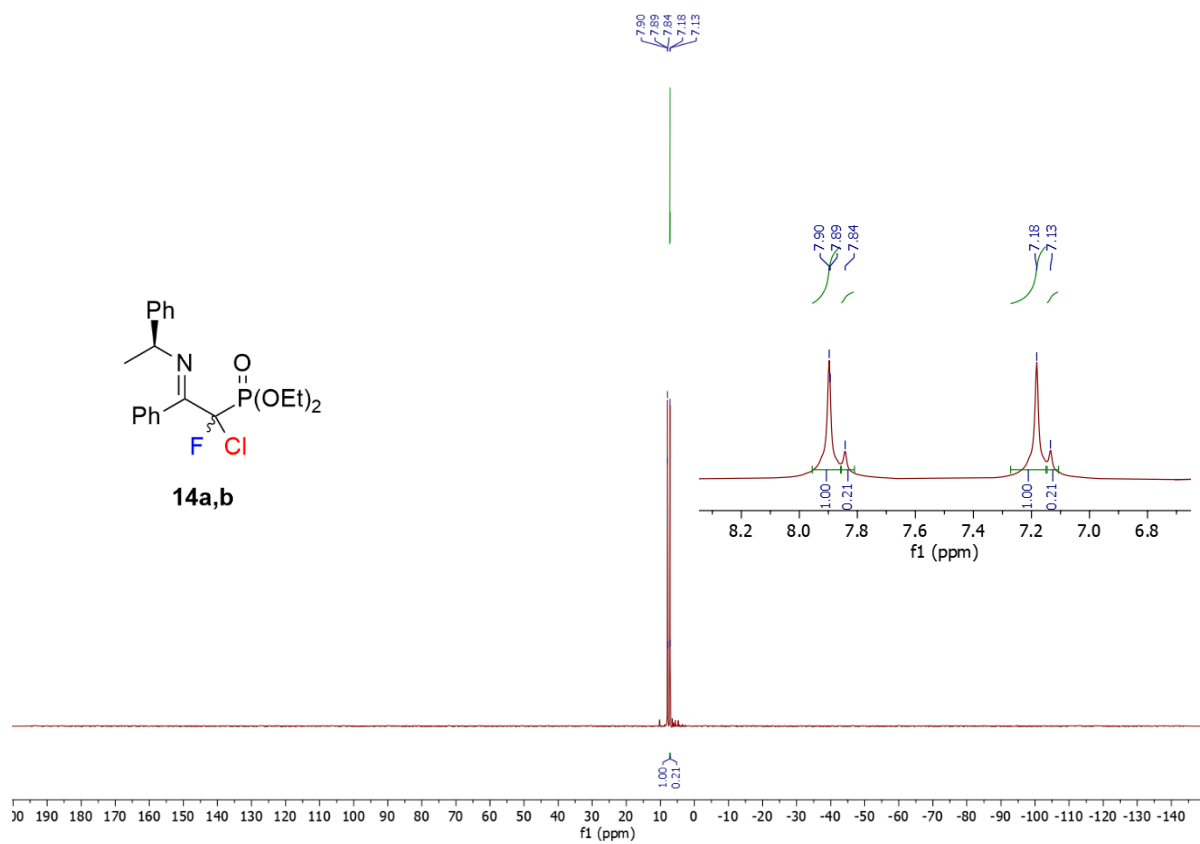

$^{31}\text{P}\{^1\text{H}\}$  NMR of **14a,b**  $dr = 0.2:1$

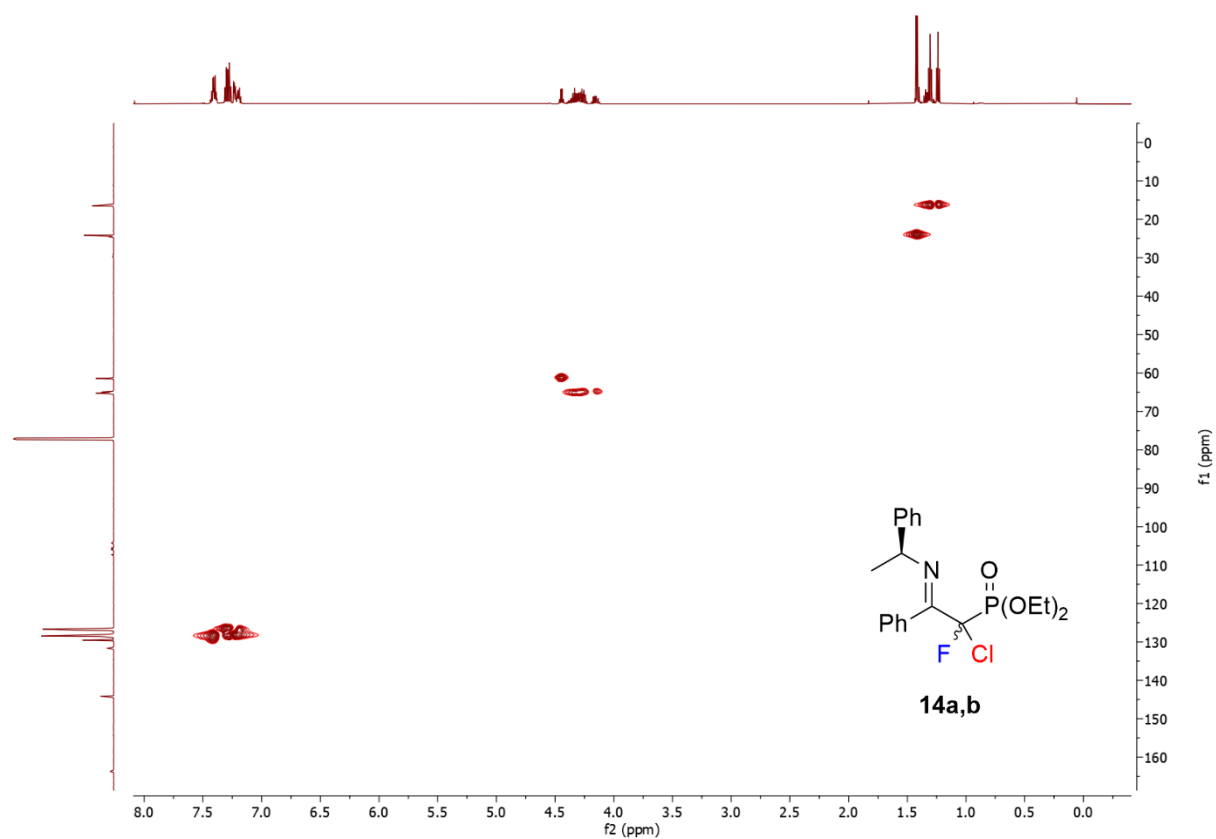

$^1\text{H}$ - $^{13}\text{C}$  HSQC NMR of **14a,b**  $dr = 0.2: 1$

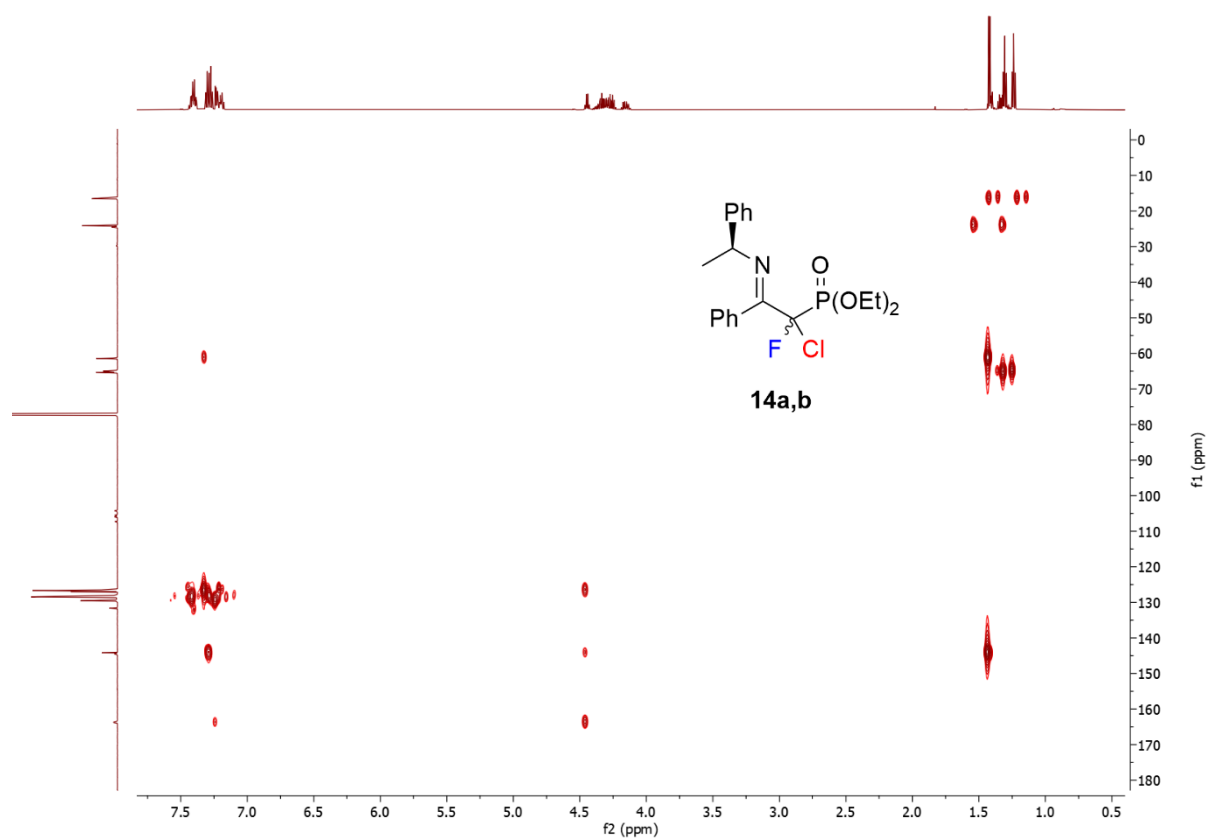

$^1\text{H}$ - $^{13}\text{C}$  HMBC NMR of **14a,b**  $dr = 0.2: 1$

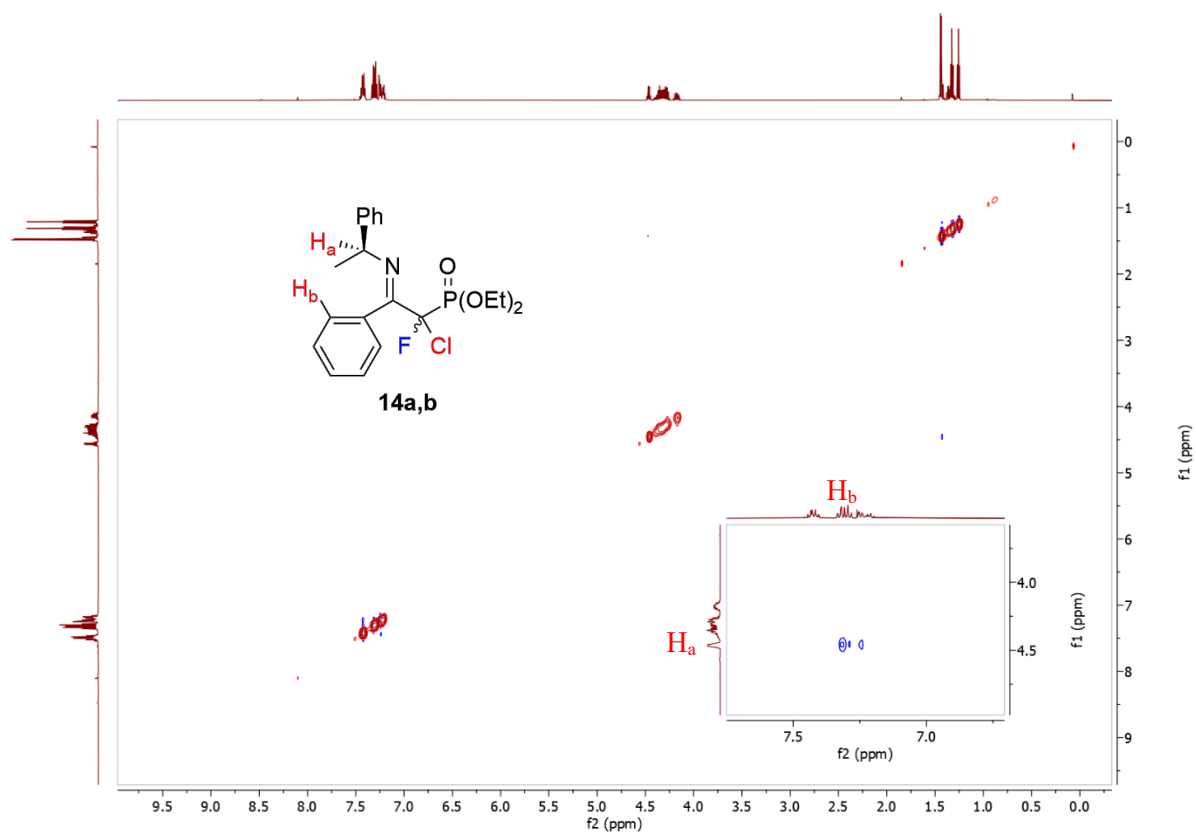

$^1\text{H}$ - $^1\text{H}$  NOESY NMR of **14a,b**  $dr = 0.2: 1$

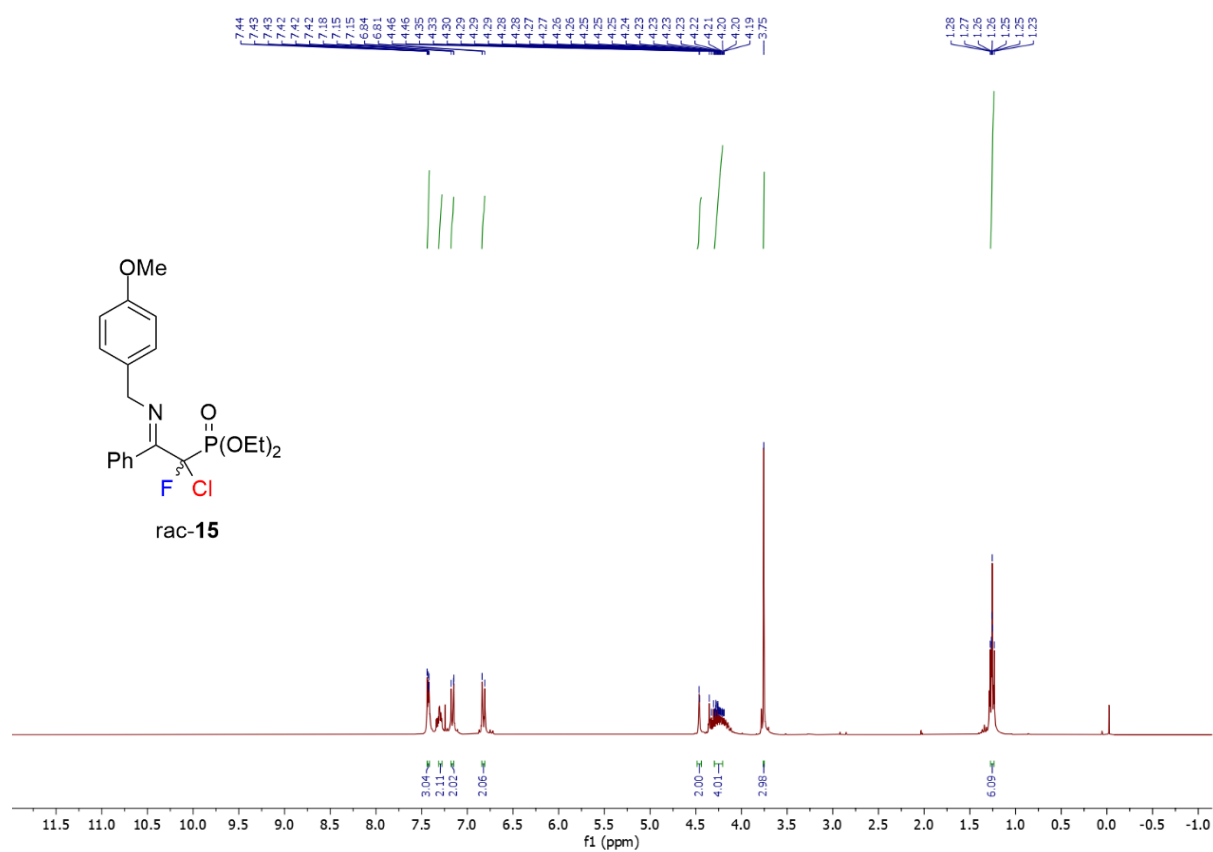

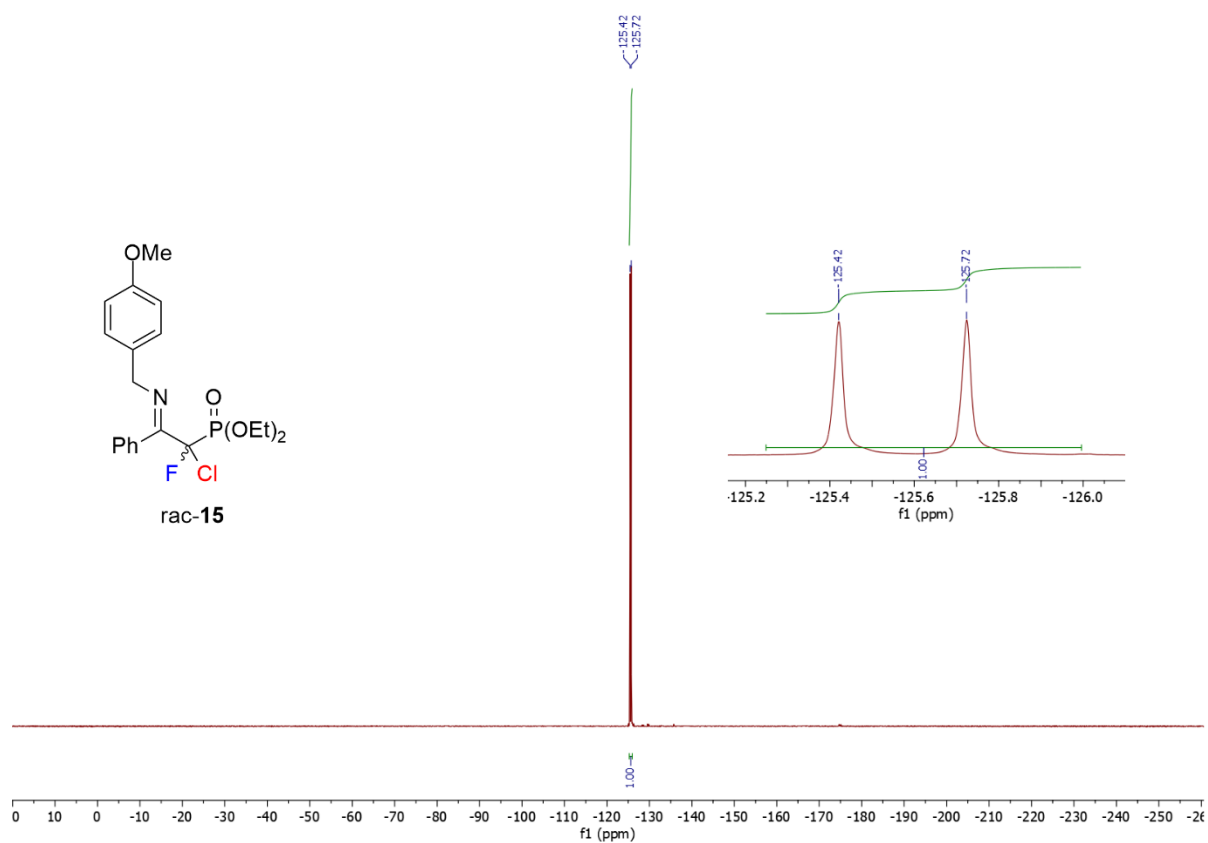

$^{19}\text{F}$  NMR of **rac-15**

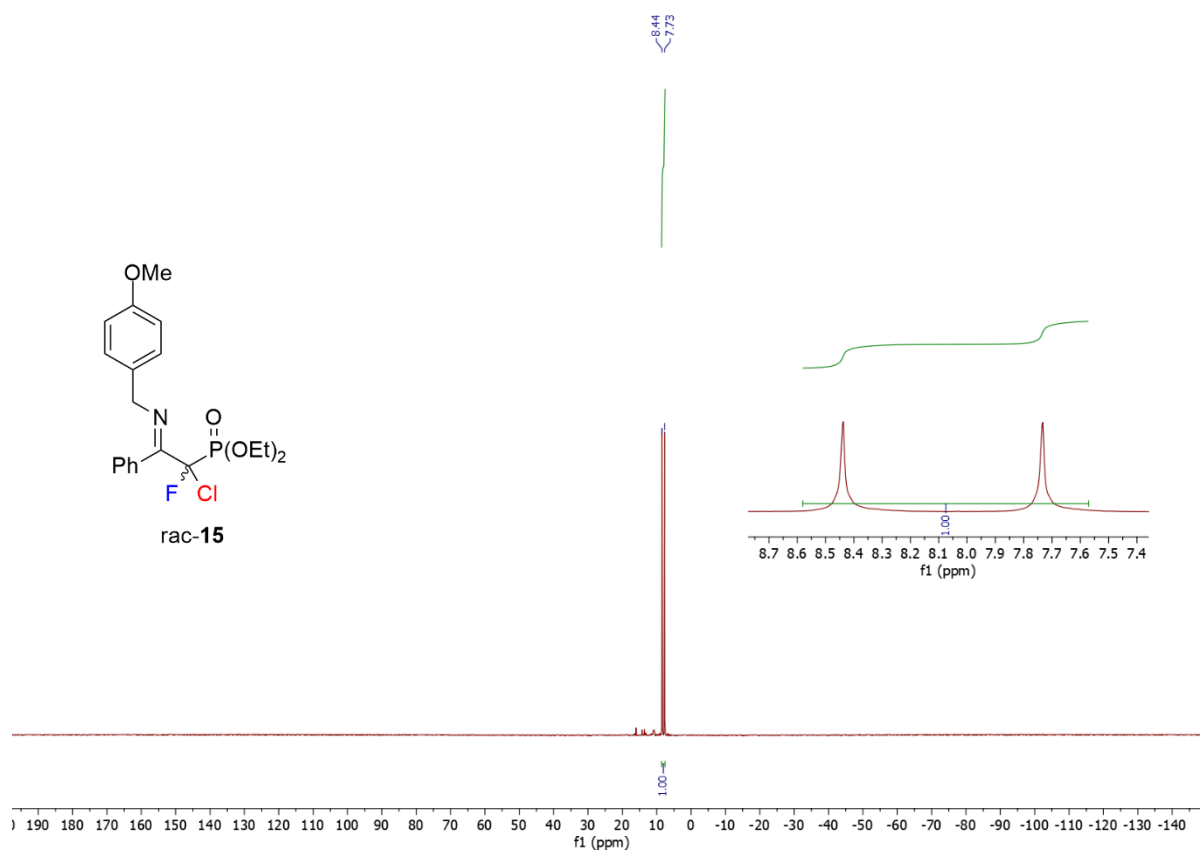

$^{31}\text{P}\{^1\text{H}\}$  NMR of **rac-15**





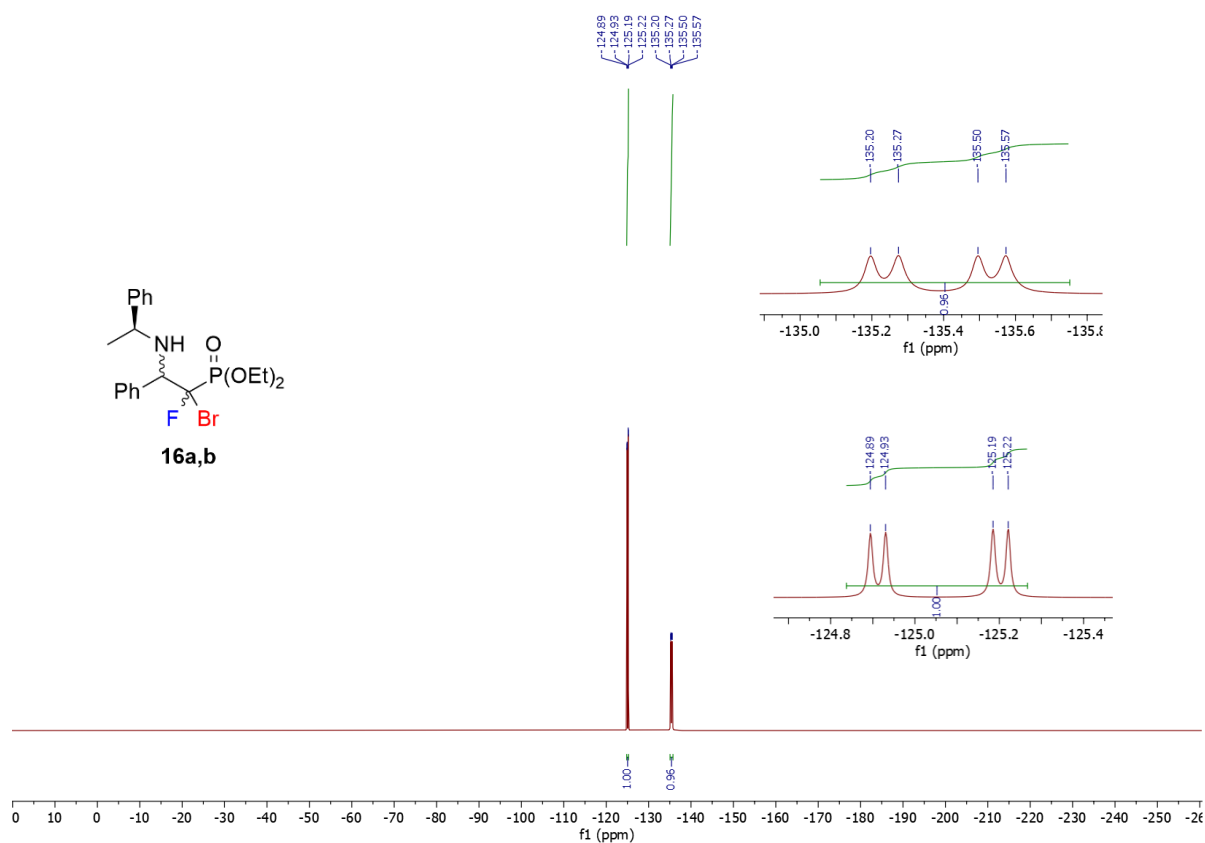

$^{19}\text{F}$  NMR of **16a,b**  $dr = 1:0.96$

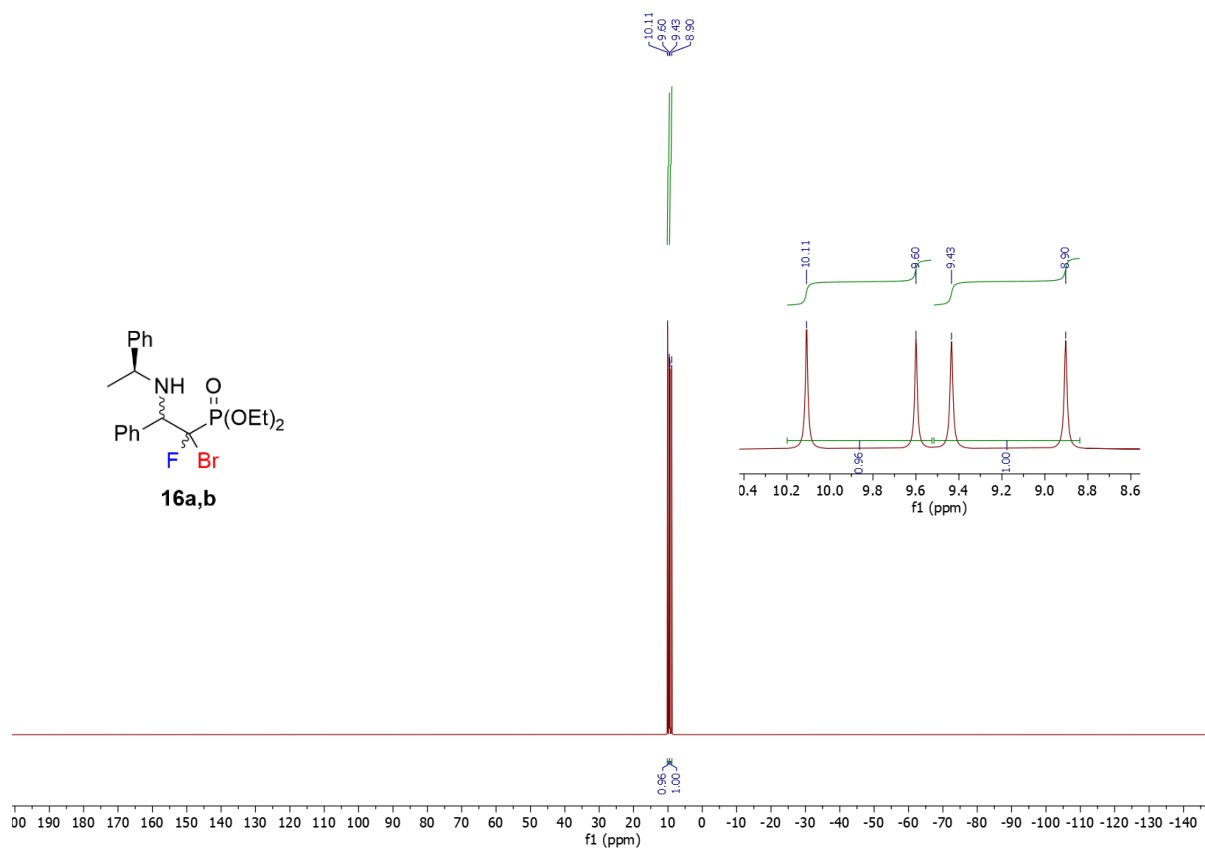

$^{31}\text{P}\{^1\text{H}\}$  NMR of **16a,b**  $dr = 1:0.96$

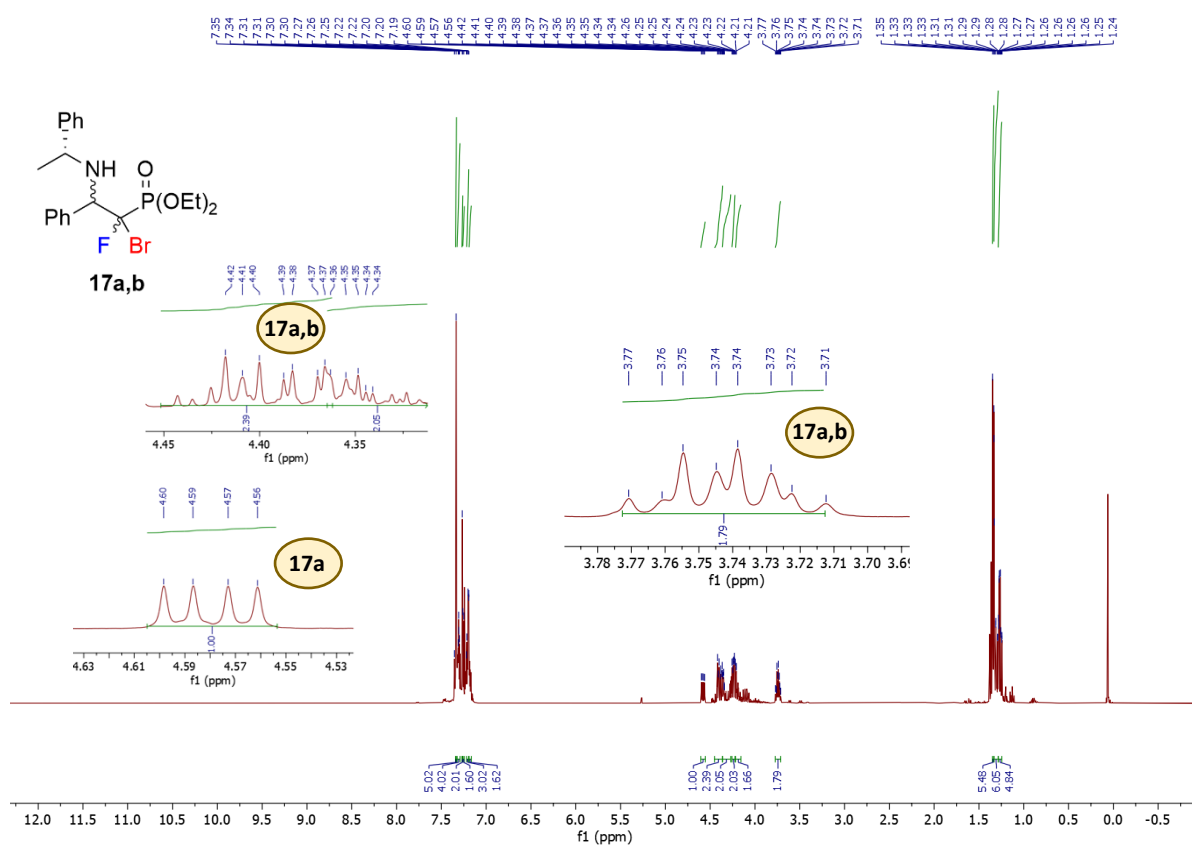

$^1\text{H}$  NMR of **17a,b**  $dr = 1:0.80$

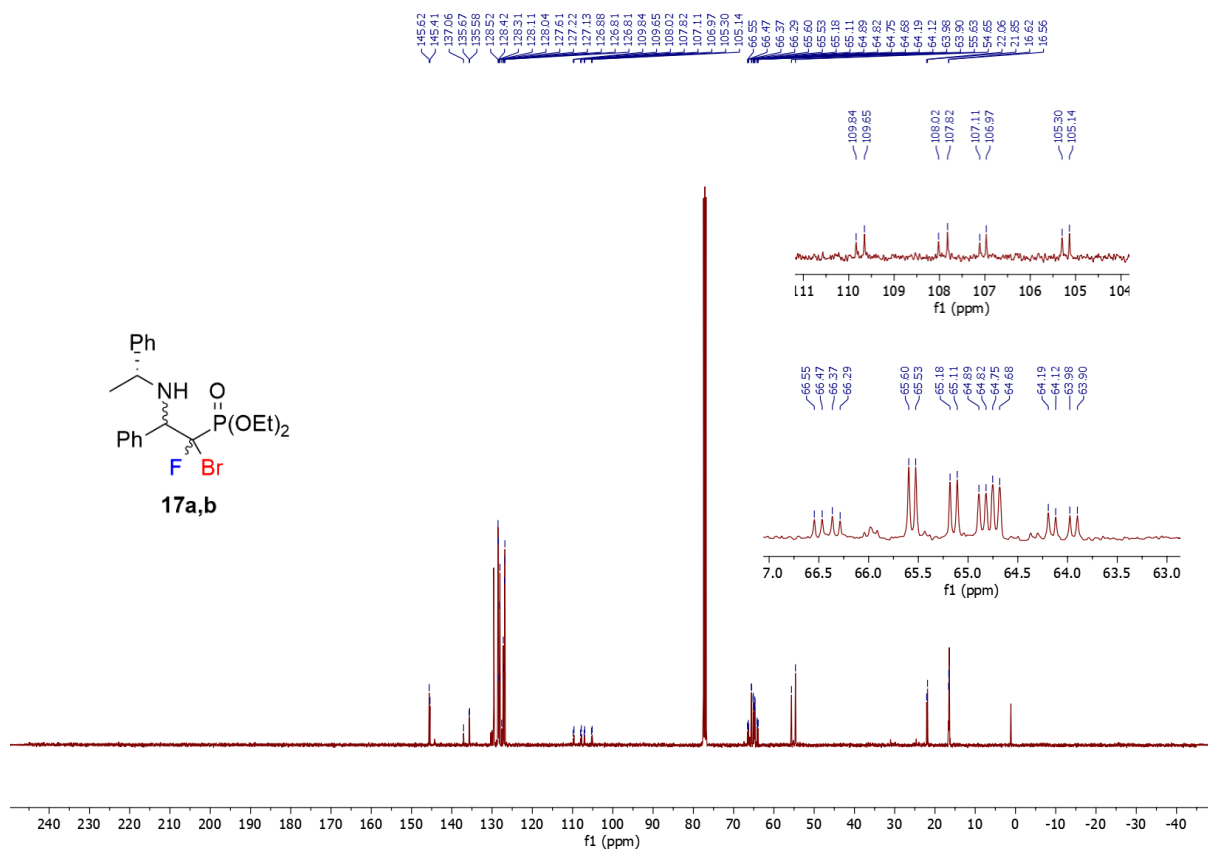

$^{13}\text{C}$  NMR of **17a,b**  $dr = 1:0.80$

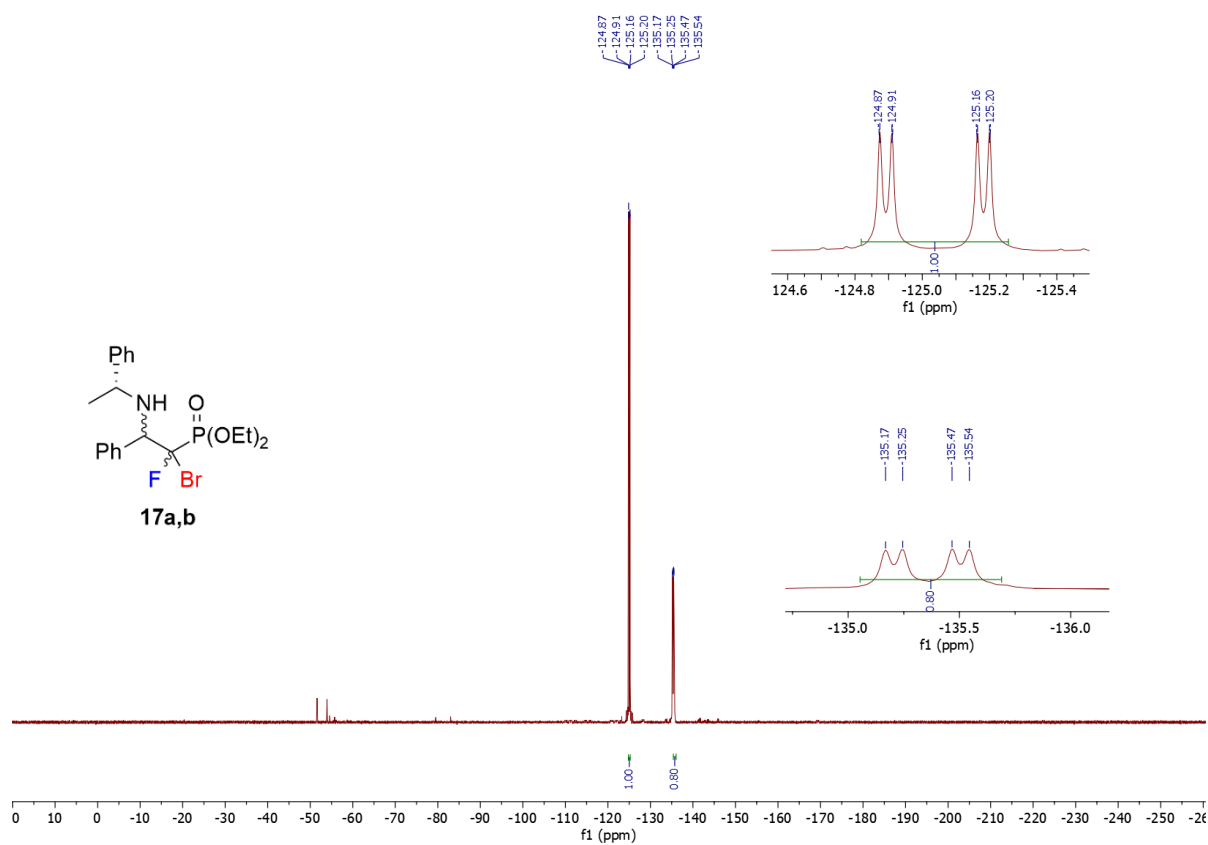

<sup>19</sup>F NMR of **17a,b**  $dr = 1:0.80$

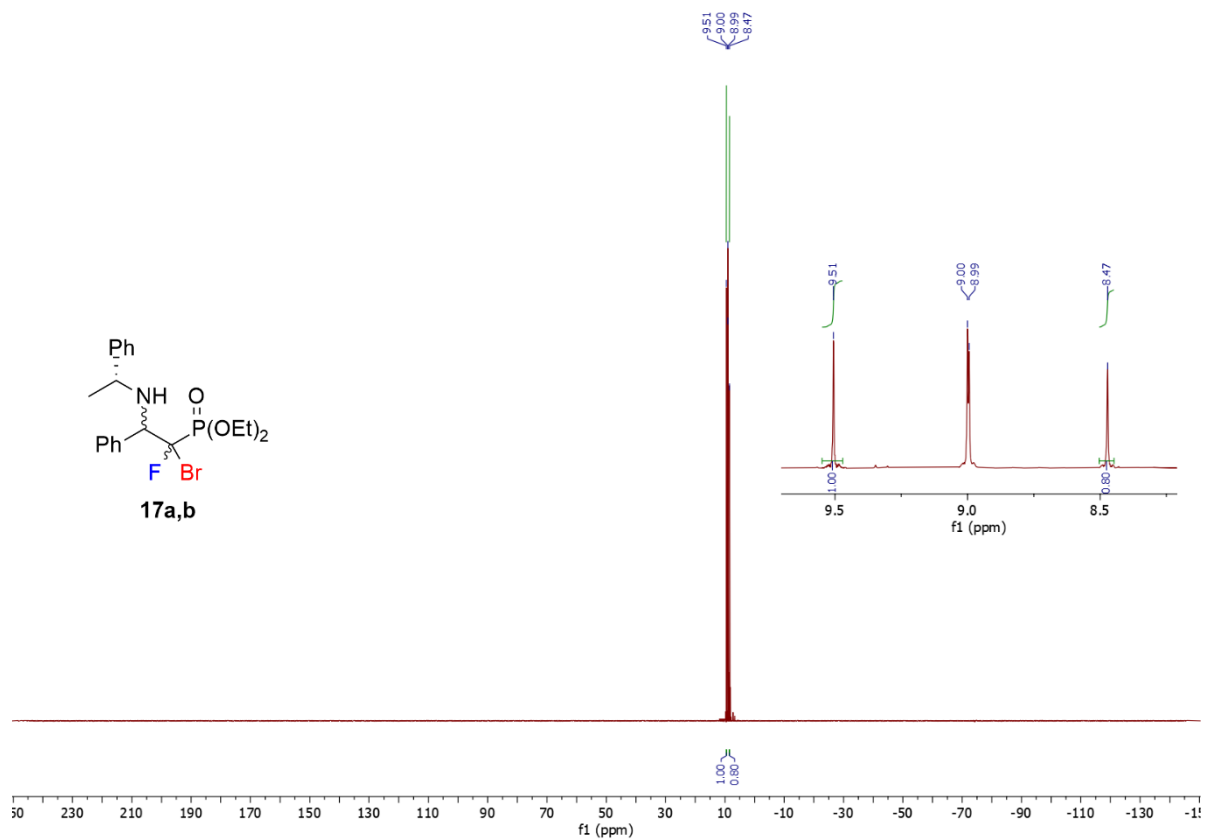

<sup>31</sup>P{<sup>1</sup>H} NMR of **17a,b**  $dr = 1:0.80$

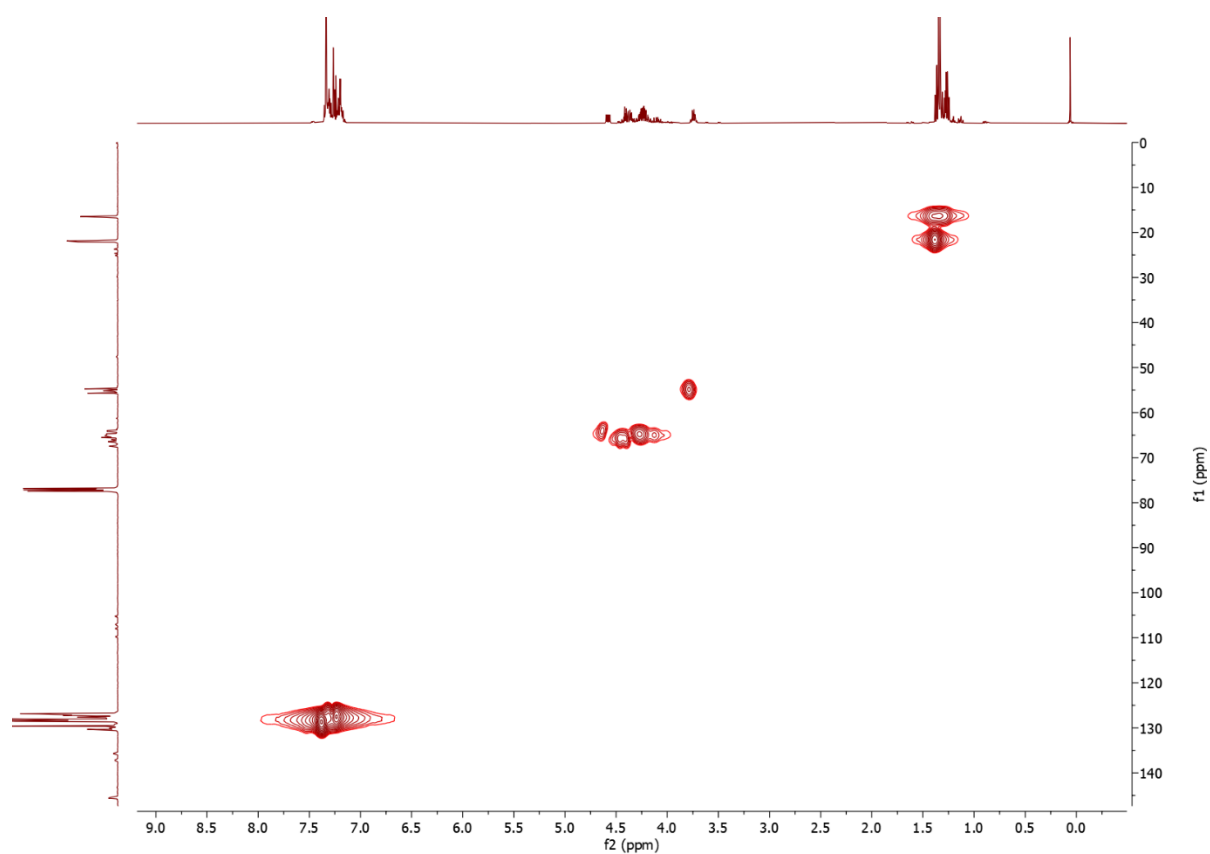

$^1\text{H}$ - $^{13}\text{C}$  HSQC NMR of **17a,b**  $dr = 1:0.80$



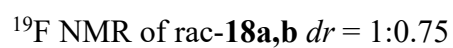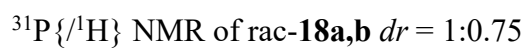

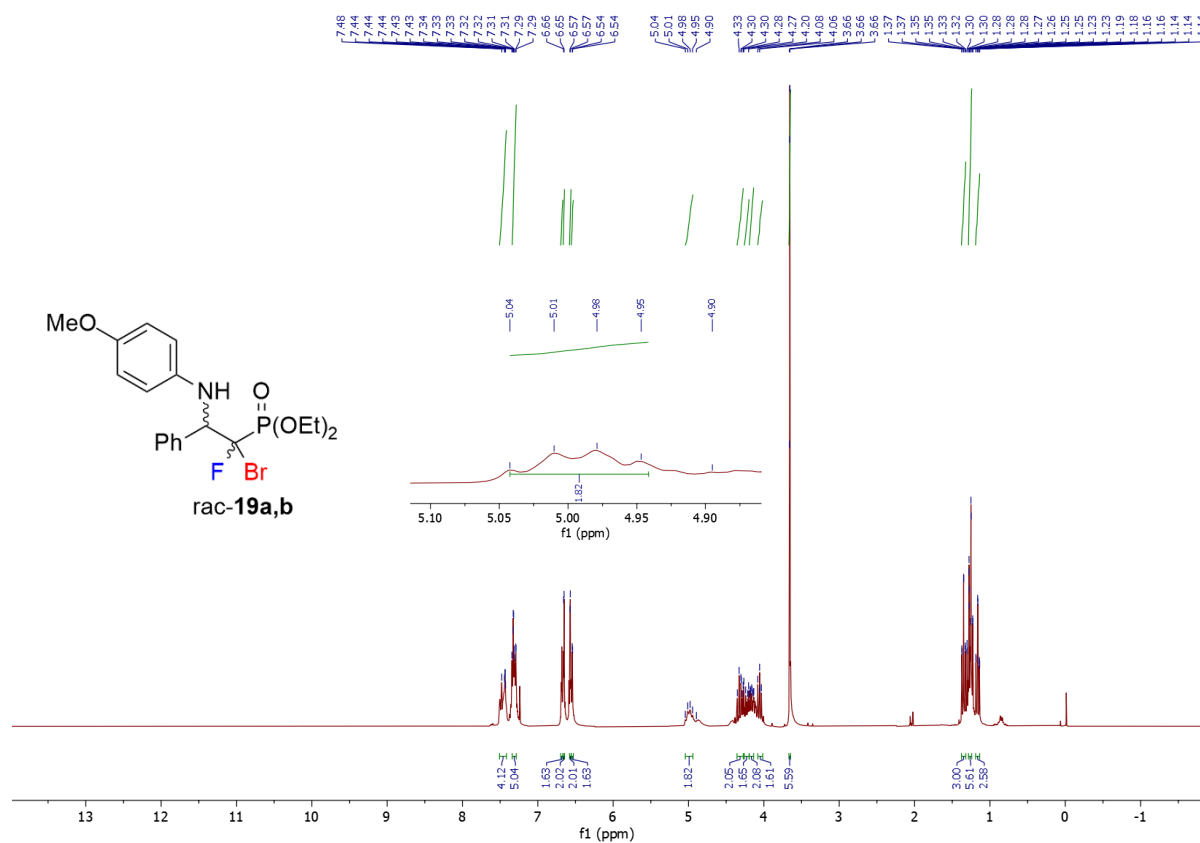

<sup>1</sup>H NMR of **rac-19a,b** *dr* = 1:0.86

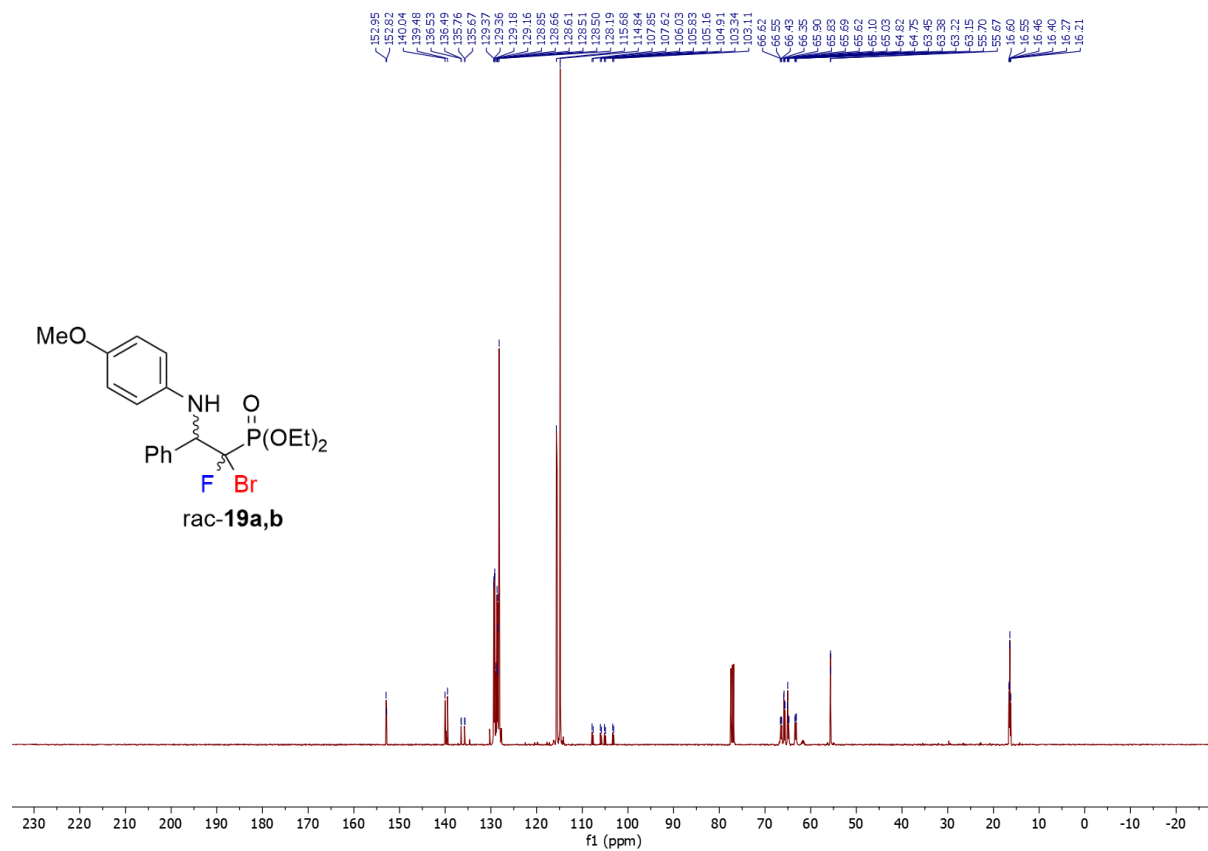

<sup>13</sup>C NMR of **rac-19a,b** *dr* = 1:0.86



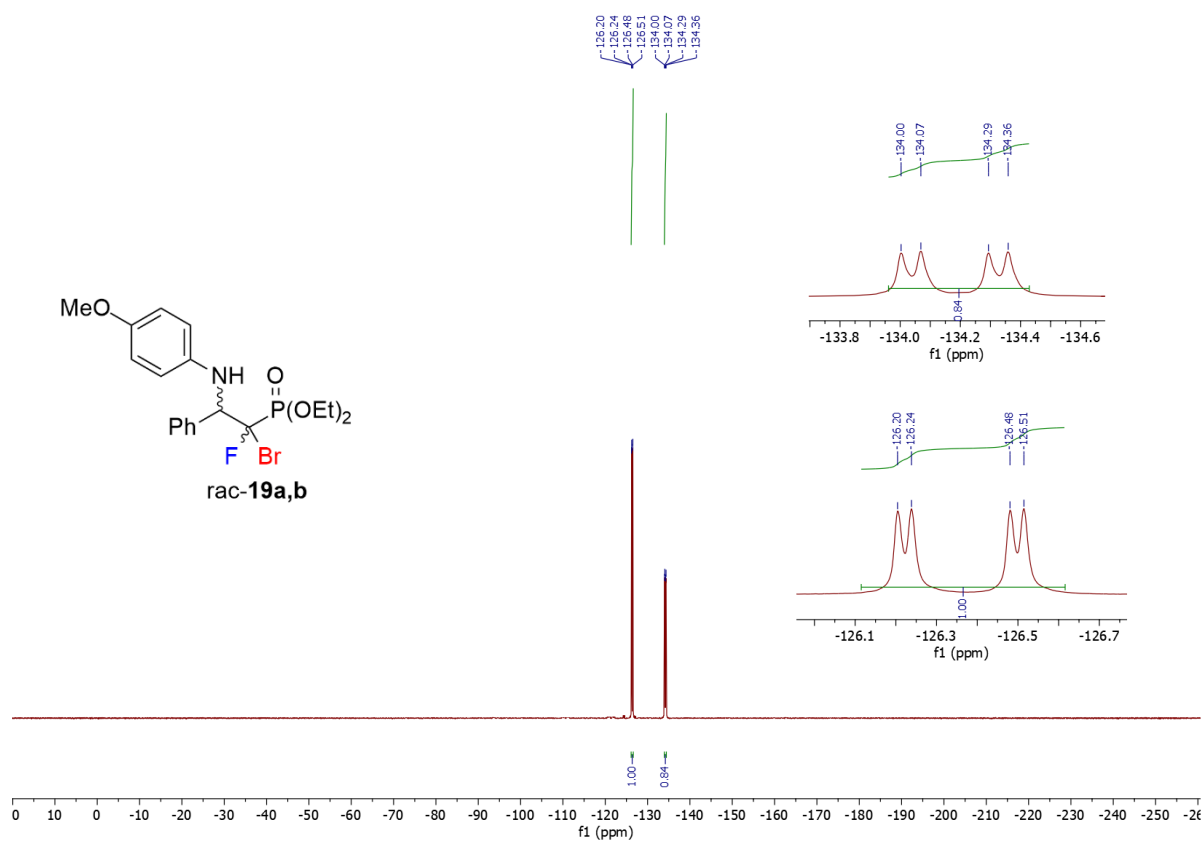

<sup>19</sup>F NMR of **rac-19a,b**  $dr = 1:0.86$

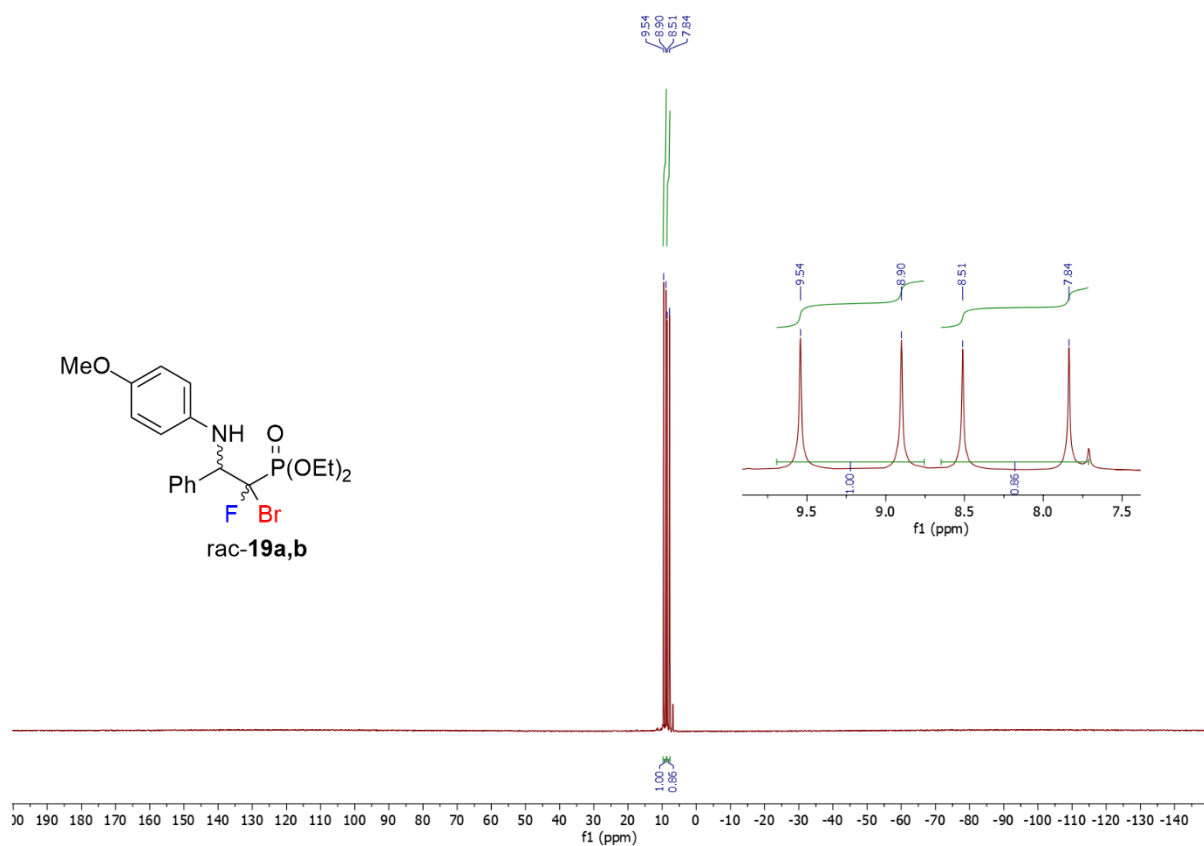

<sup>31</sup>P {<sup>1</sup>H} NMR of **rac-19a,b**  $dr = 1:0.86$

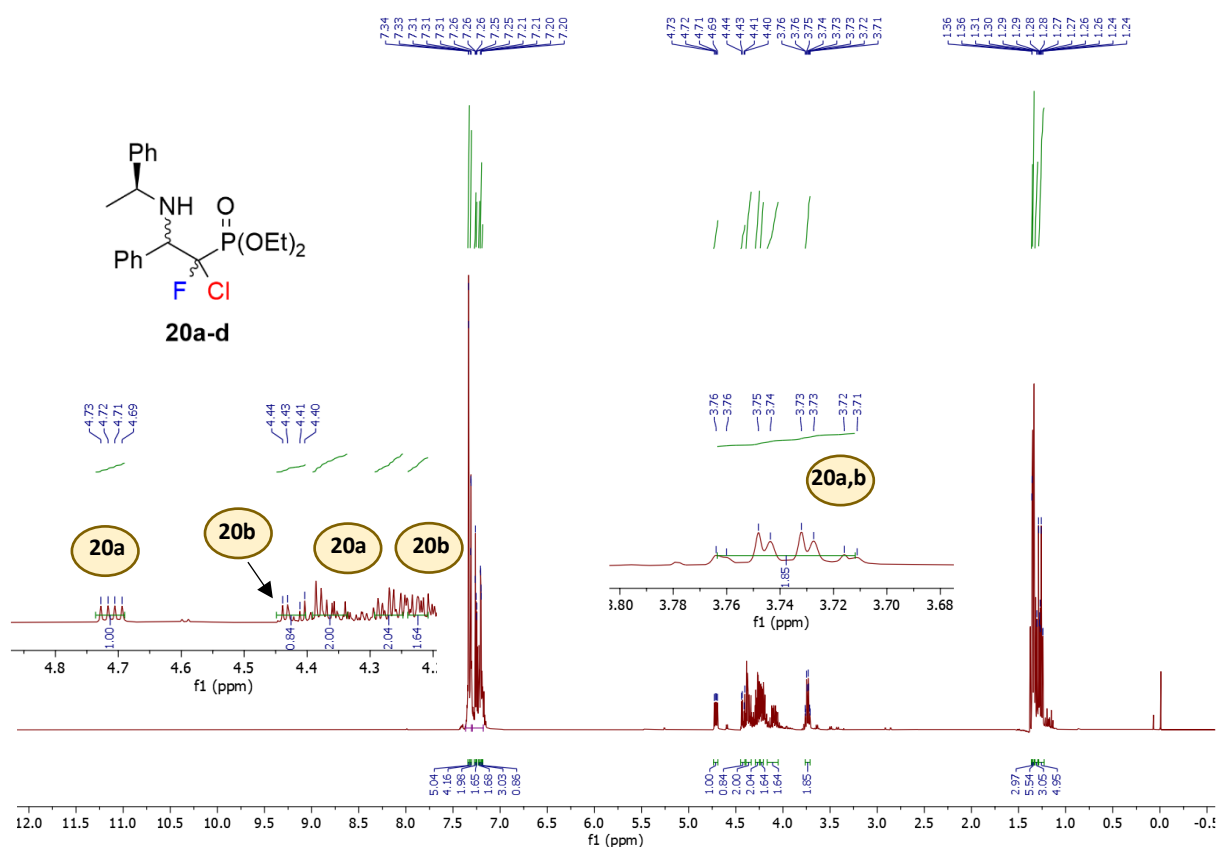

$^1\text{H}$  NMR of **20a-d**  $dr = 1:0.83:0.07:0.11$

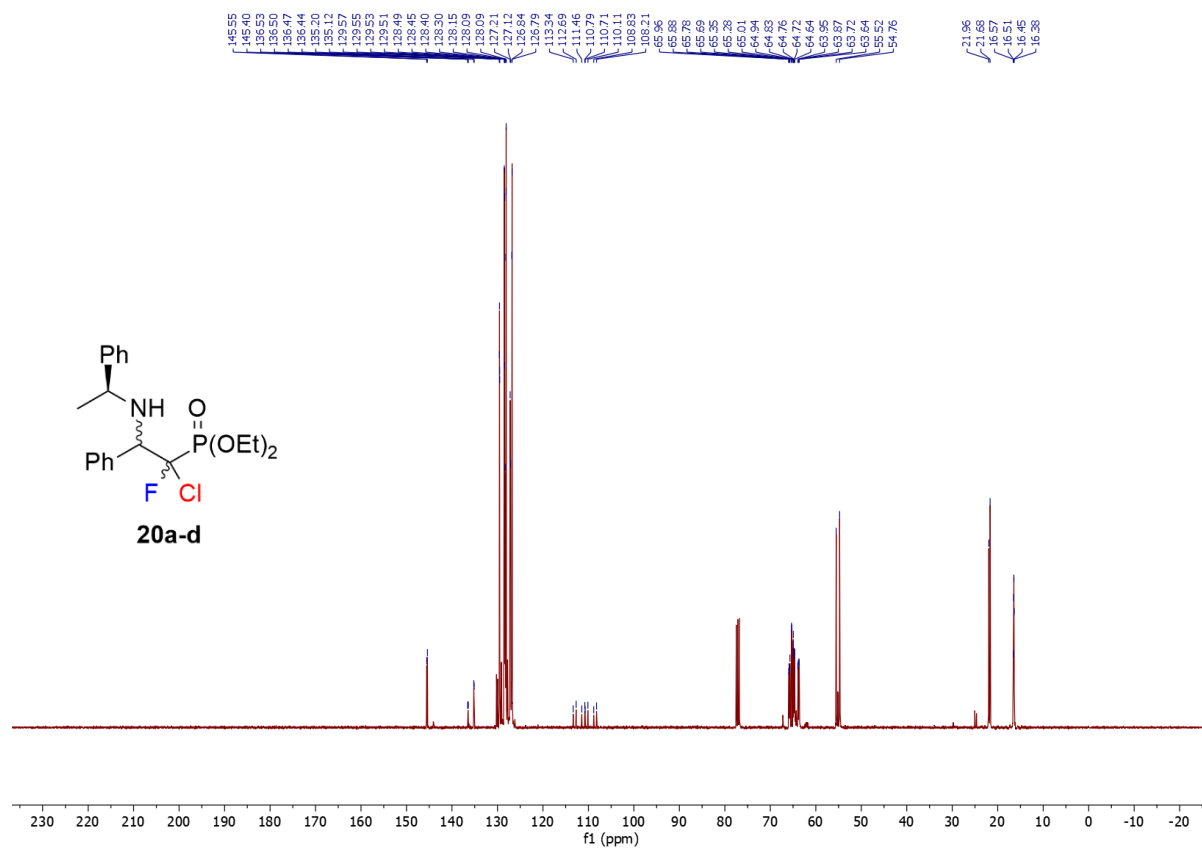

$^{13}\text{C}$  NMR of **20a-d**  $dr = 1:0.83:0.07:0.11$

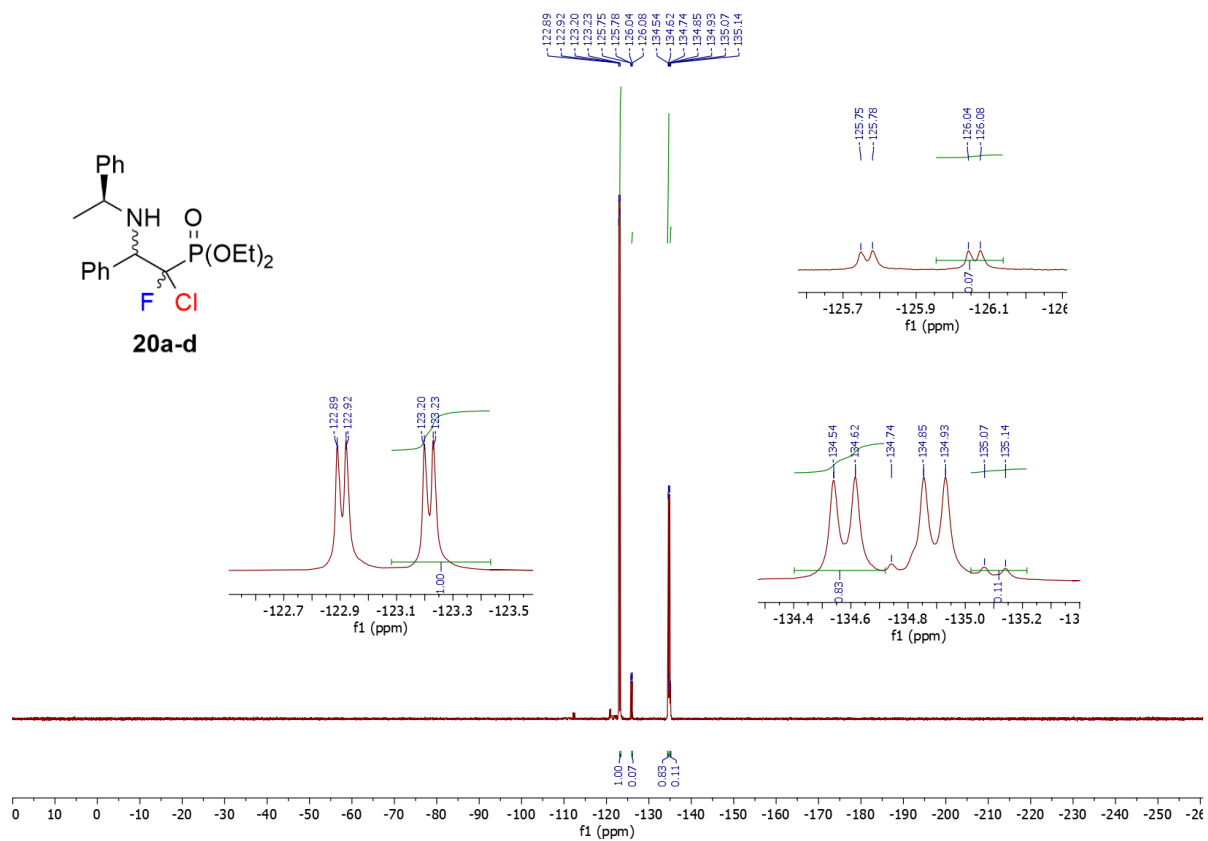

<sup>19</sup>F NMR of **20a-d**  $dr = 1:0.83:0.07:0.11$

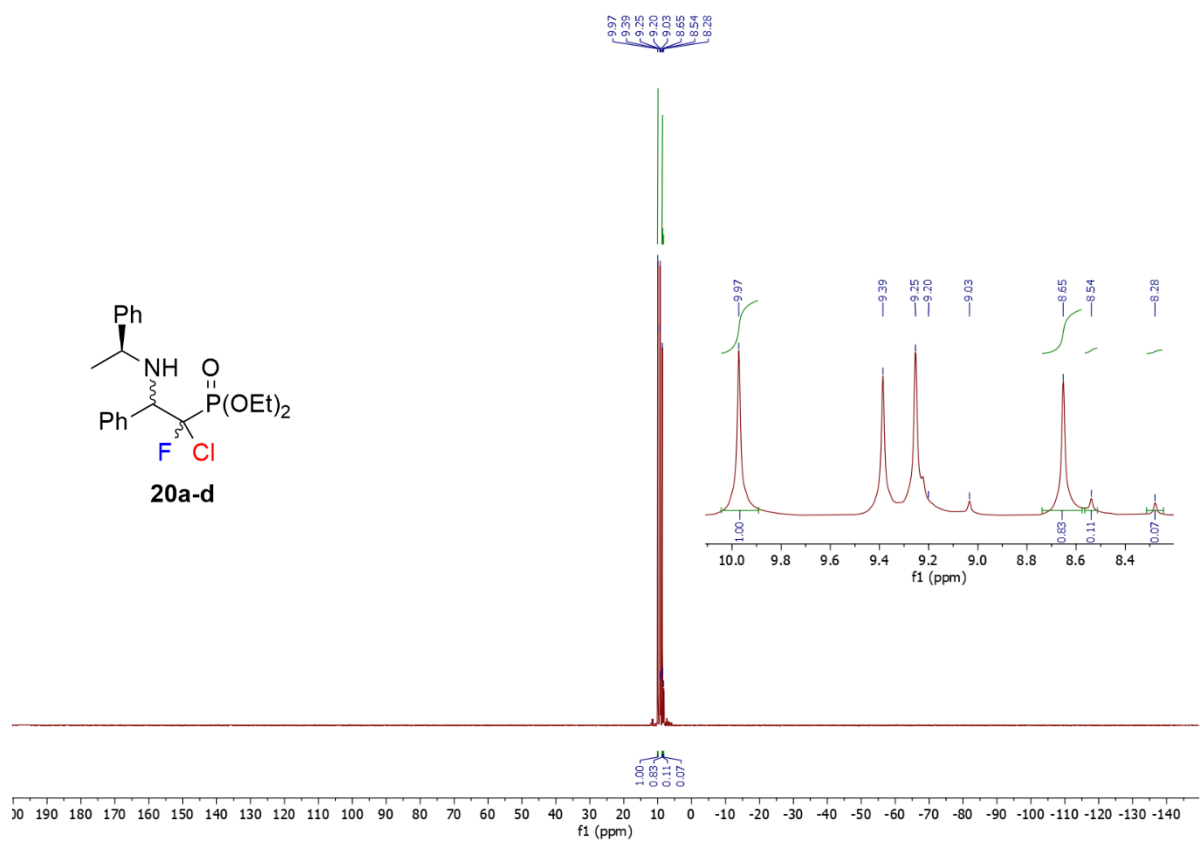

<sup>31</sup>P {<sup>1</sup>H} NMR of **20a-d**  $dr = 1:0.83:0.07:0.11$

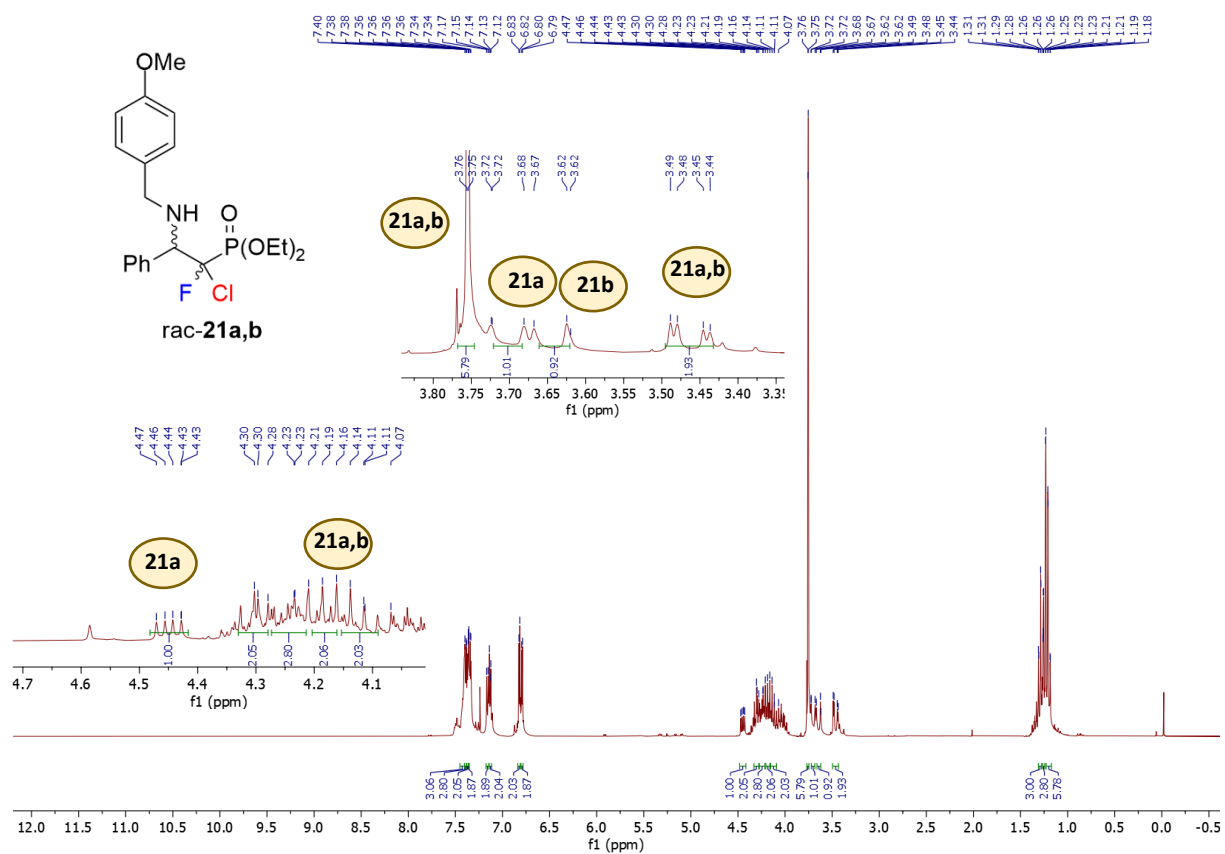

<sup>1</sup>H NMR of **rac-21a,b** *dr* = 1:0.92

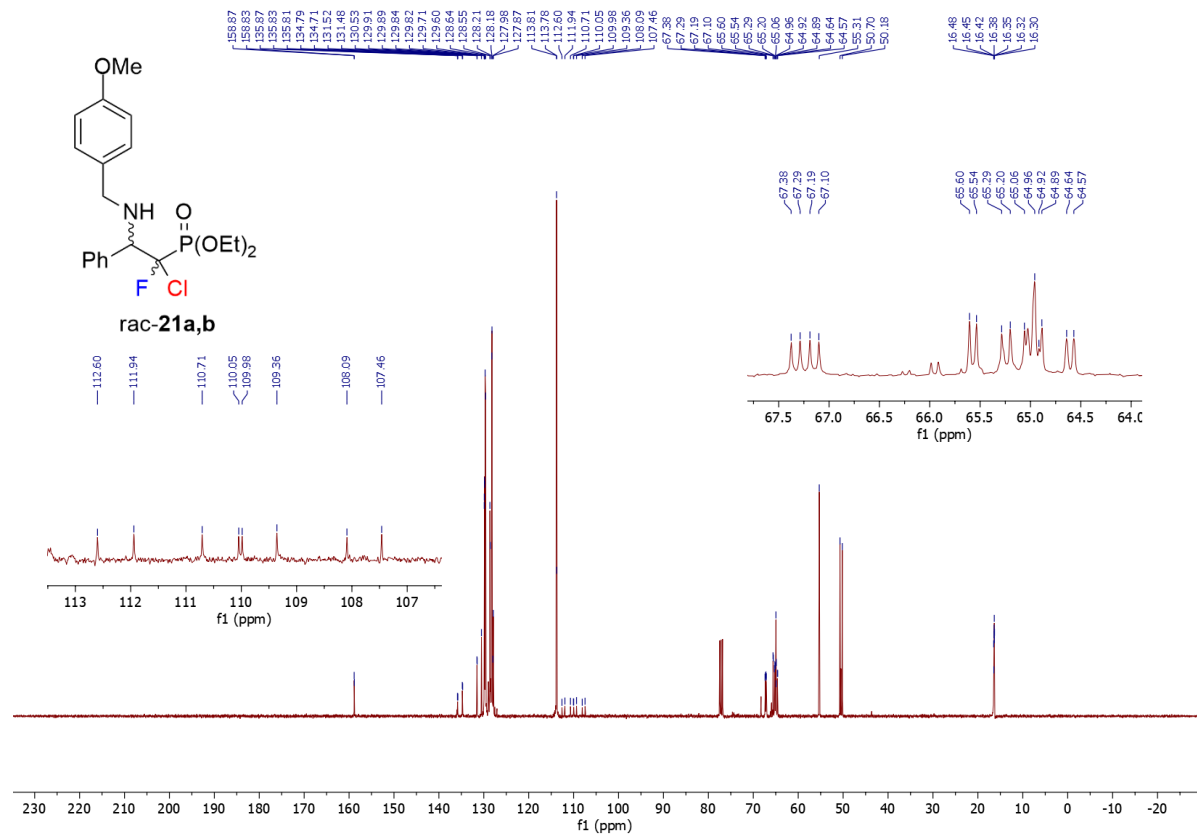

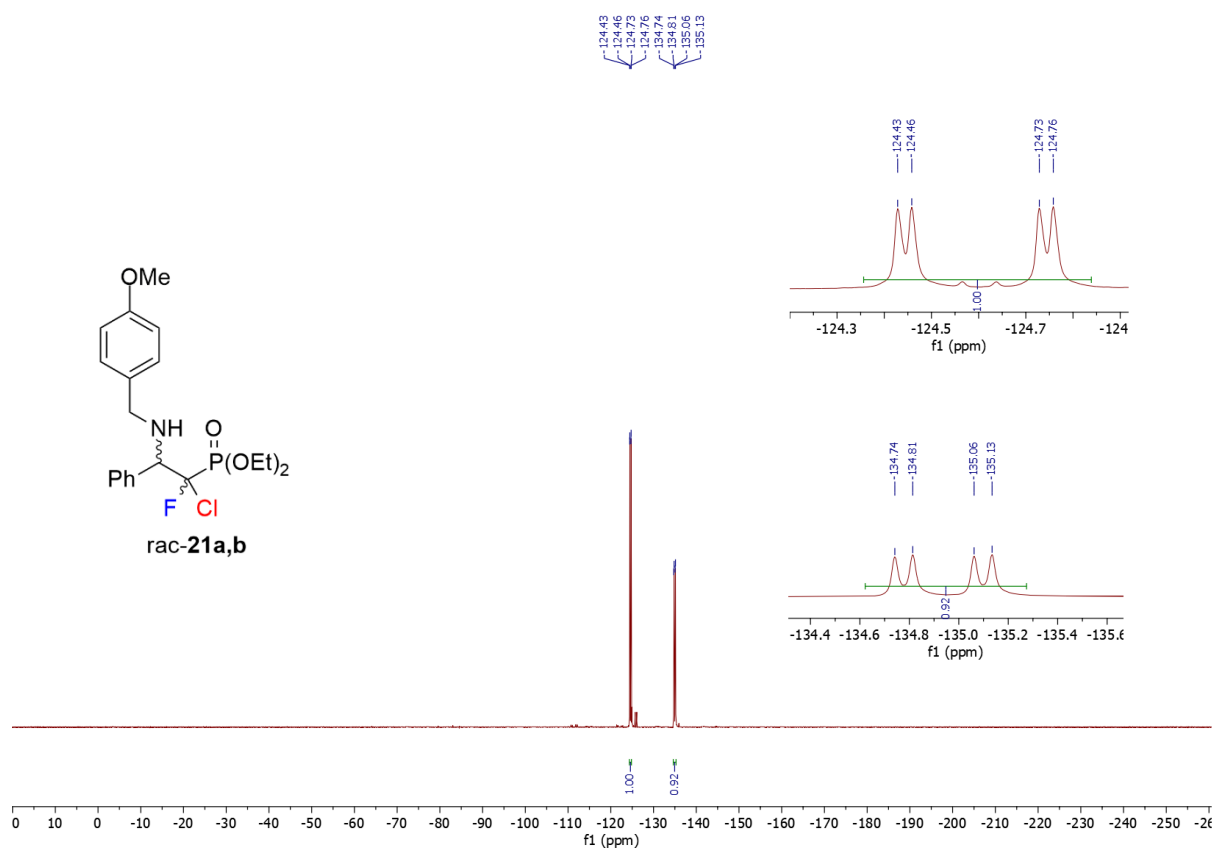

$^{19}\text{F}$  NMR of **rac-21a,b**  $dr = 1:0.92$

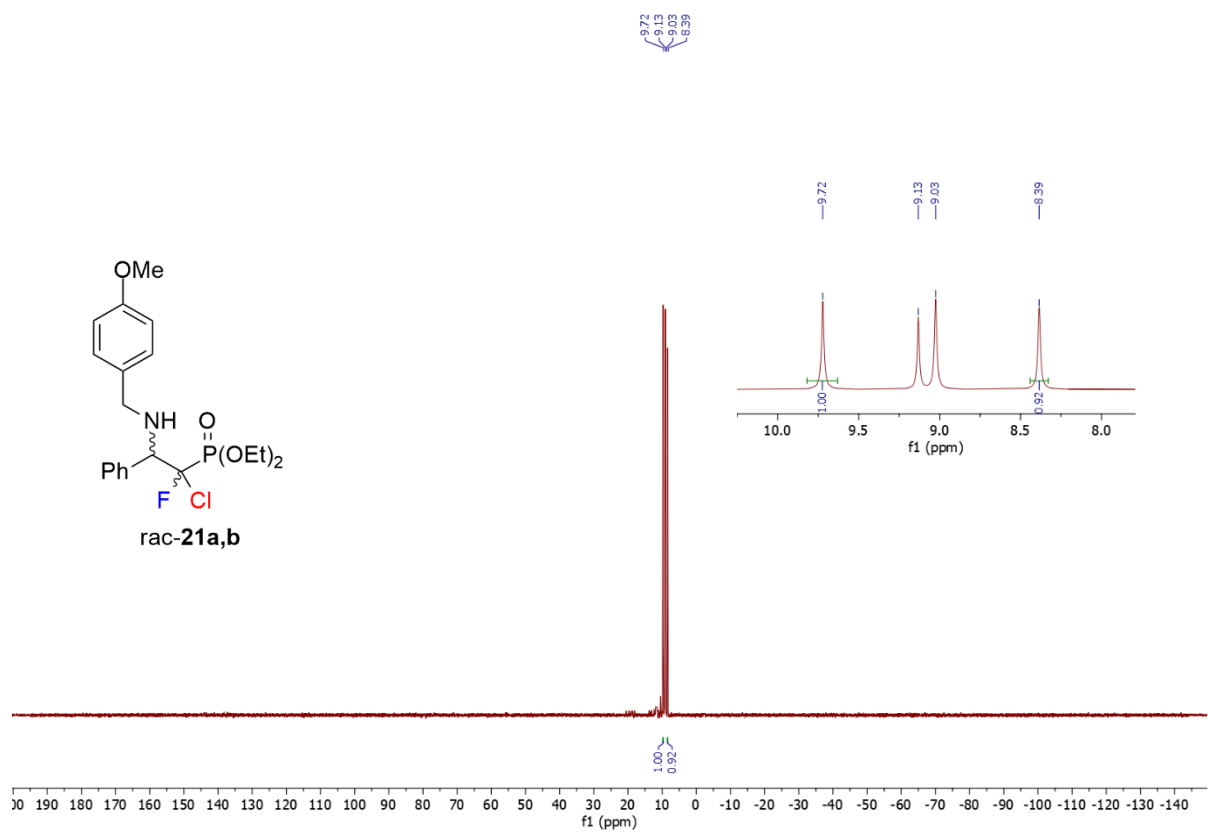

$^{31}\text{P}\{^1\text{H}\}$  NMR of **rac-21a,b**  $dr = 1:0.92$

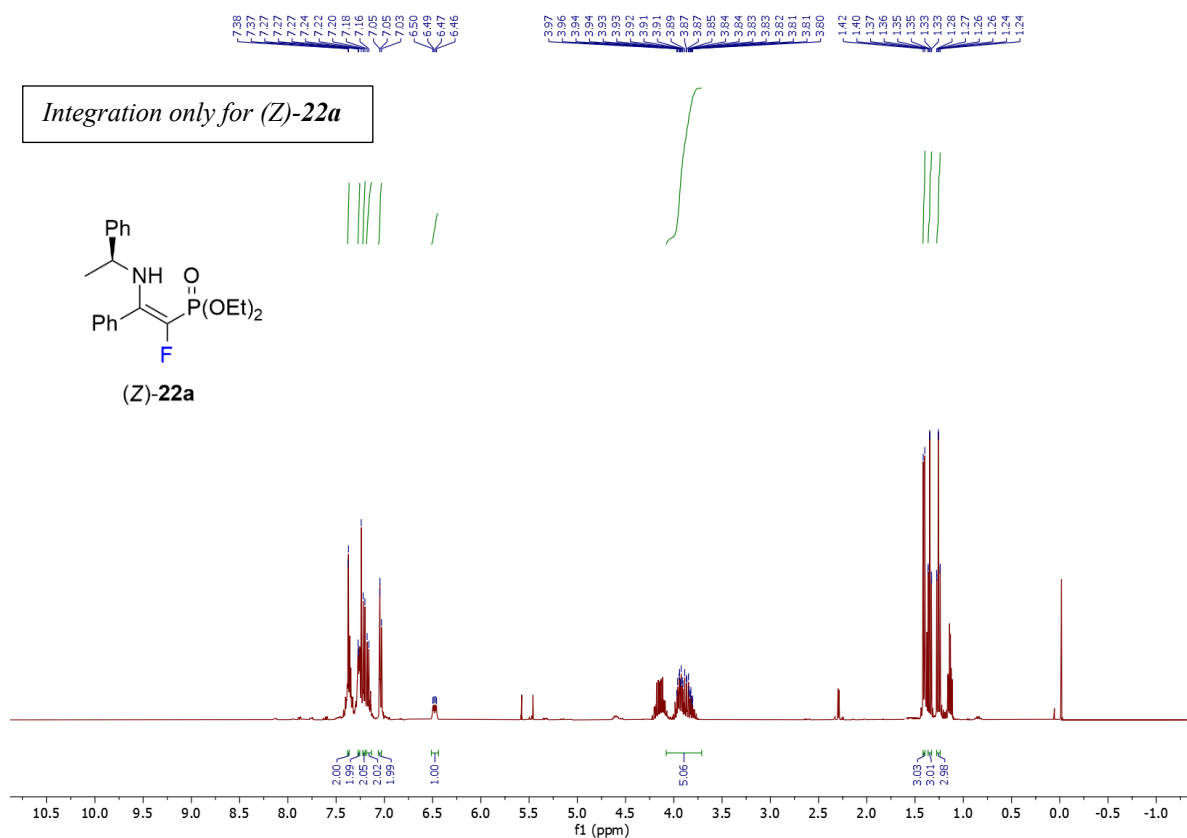

<sup>1</sup>H NMR of enamine (**22a,b**)/imine (**23a,b**) ratio 1:0.05. (Z)-22a/(E)-22b ratio 1:0.31.

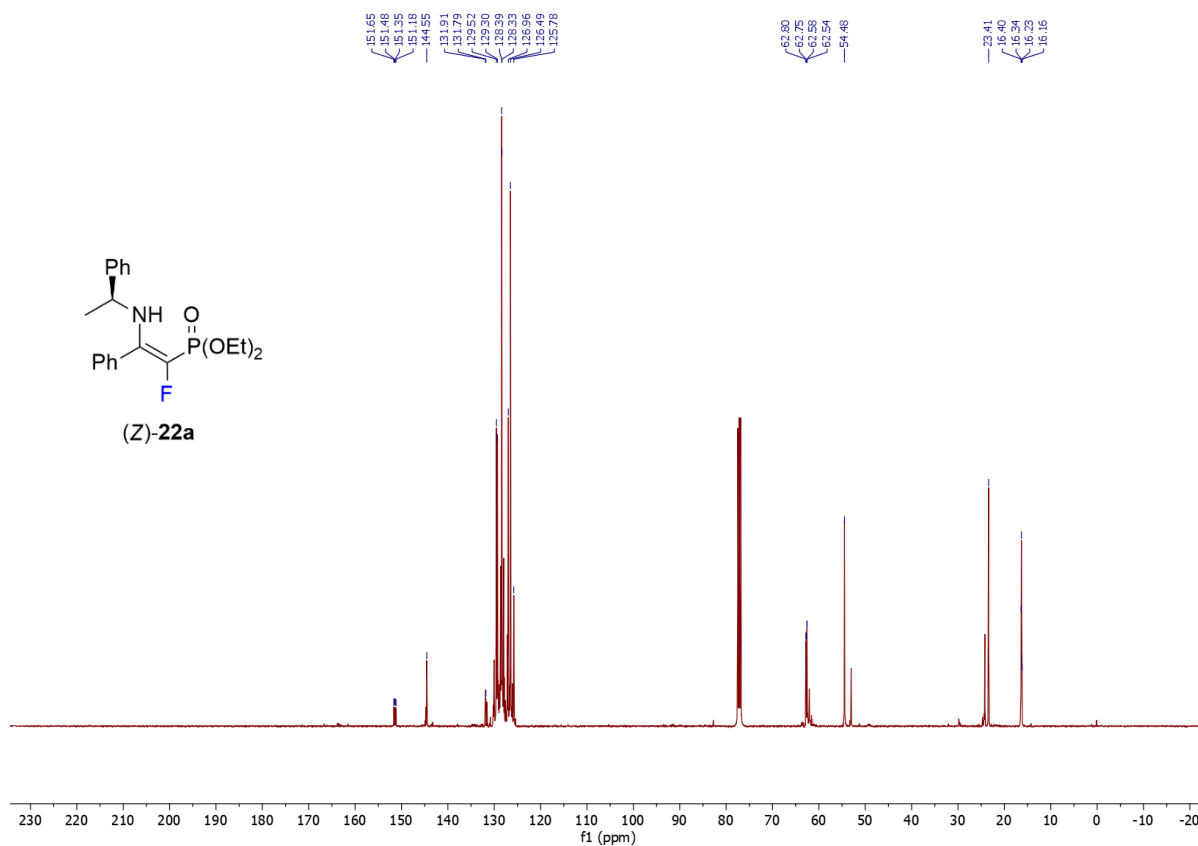

<sup>13</sup>C NMR of enamine (**22a,b**)/imine (**23a,b**) ratio 1:0.05. (Z)-22a/(E)-22b ratio 1:0.31.

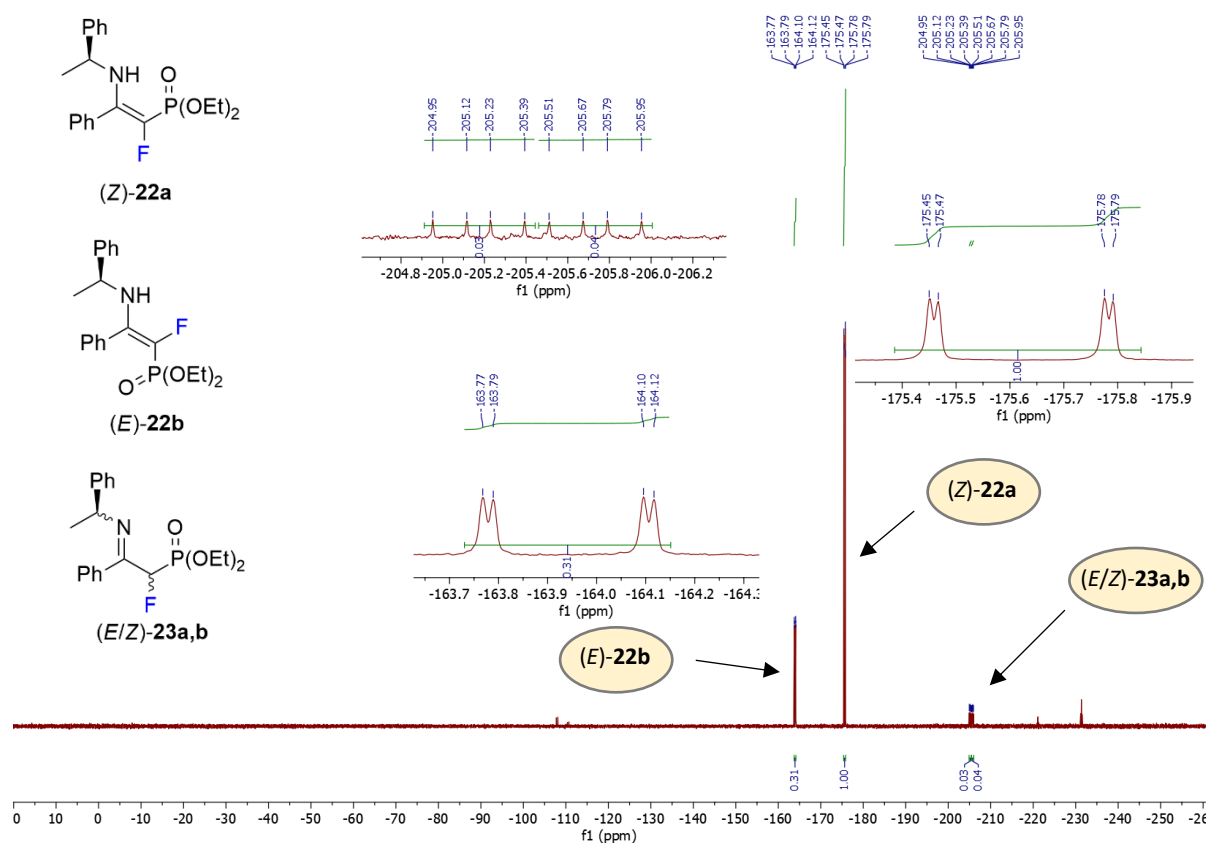

$^{19}\text{F}$  NMR of enamine (22a,b)/imine (23a,b) ratio 1:0.05. (Z)-22a/(E)-22b ratio 1:0.31.

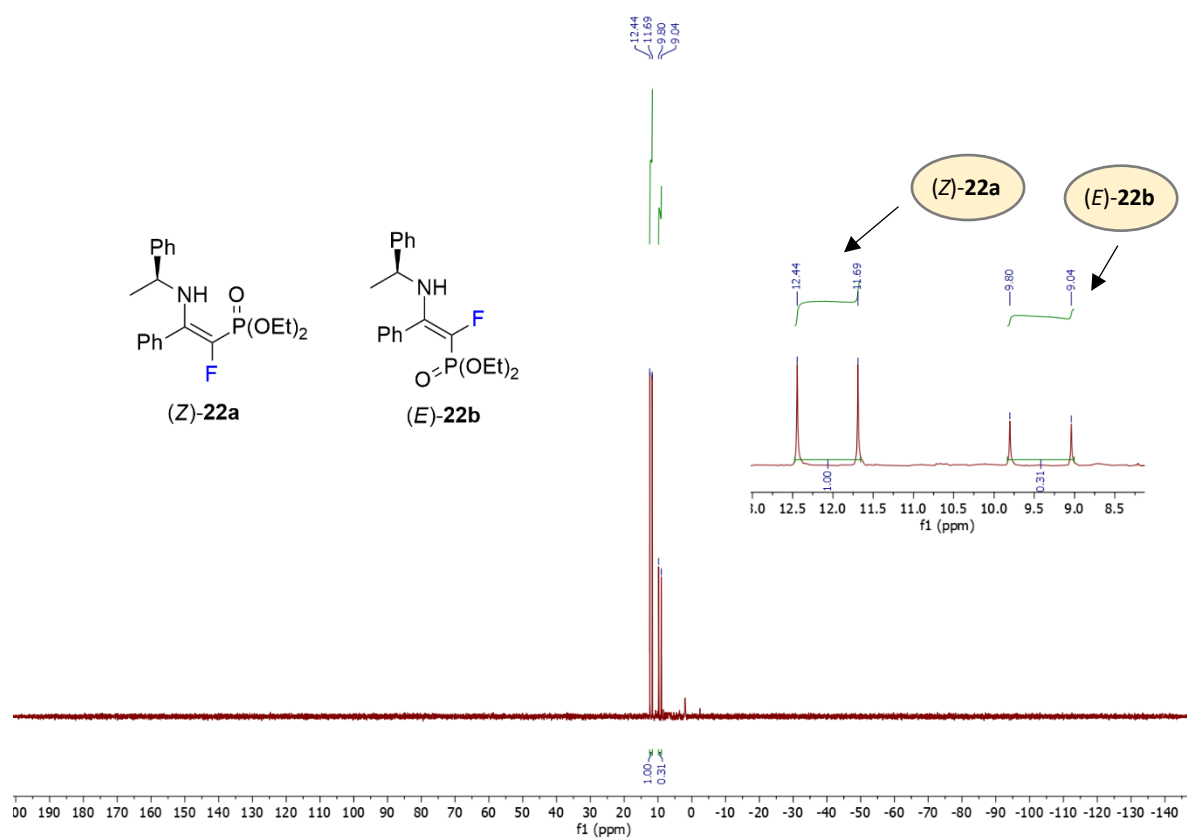

$^{31}\text{P}$  NMR of enamine (22a,b)/imine (23a,b) ratio 1:0.05. (Z)-22a/(E)-22b ratio 1:0.31.

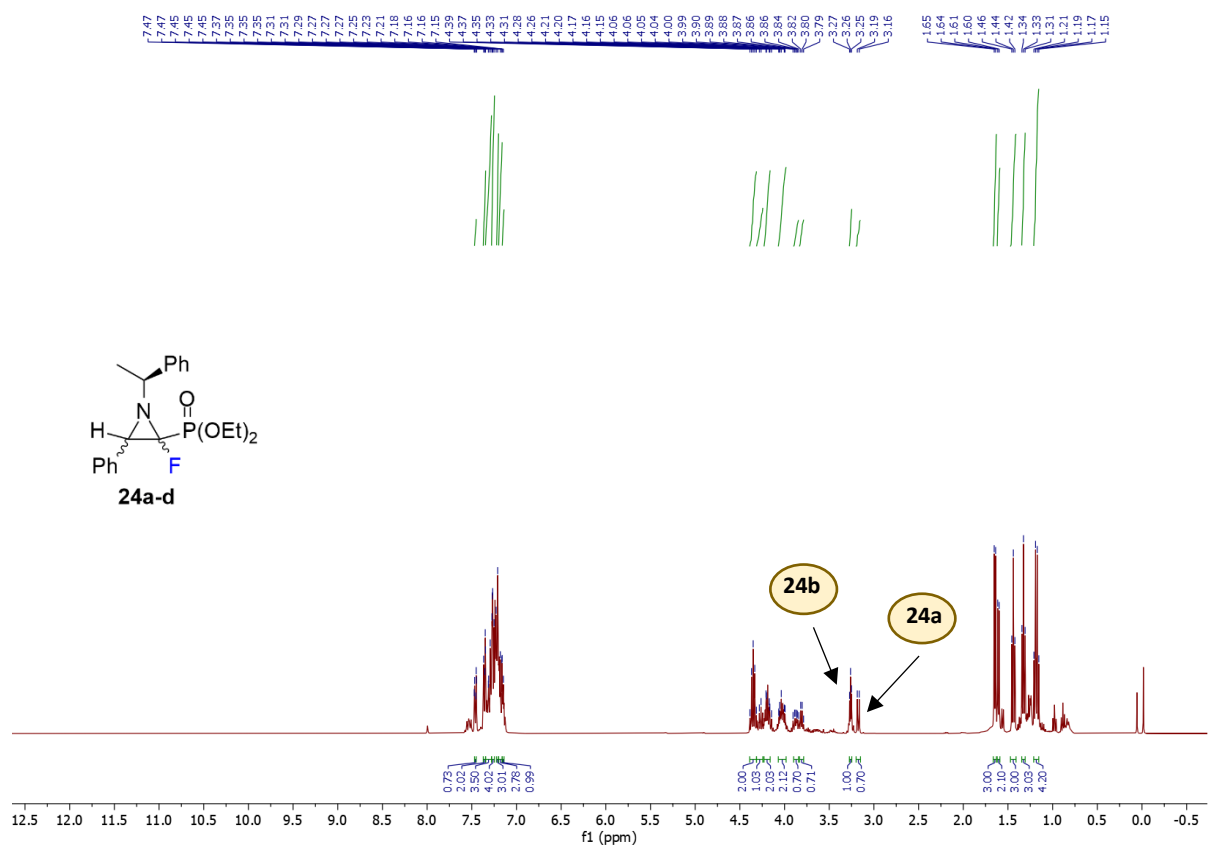

**<sup>1</sup>H NMR of **24a-d**, dr 0.70:1:0.17:0.04**

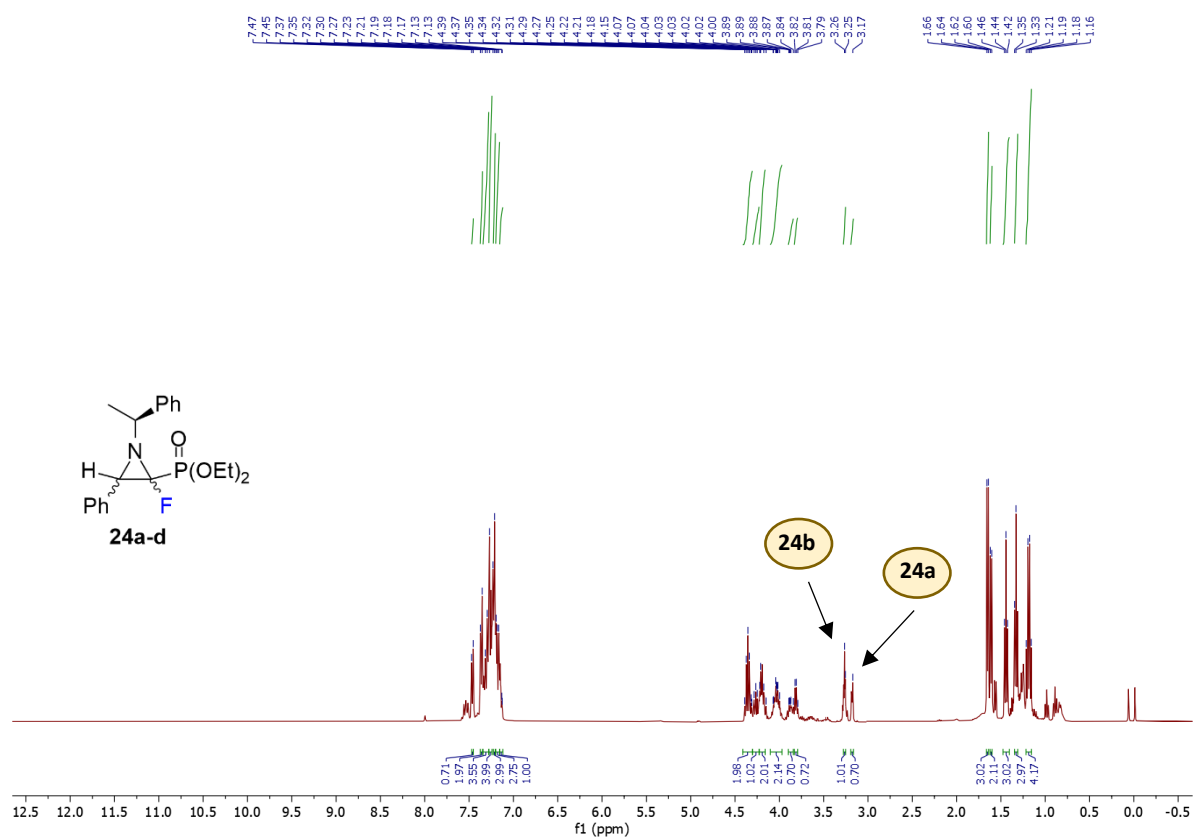

**<sup>1</sup>H{<sup>19</sup>F} NMR of **24a-d**, dr 0.70:1:0.17:0.04**



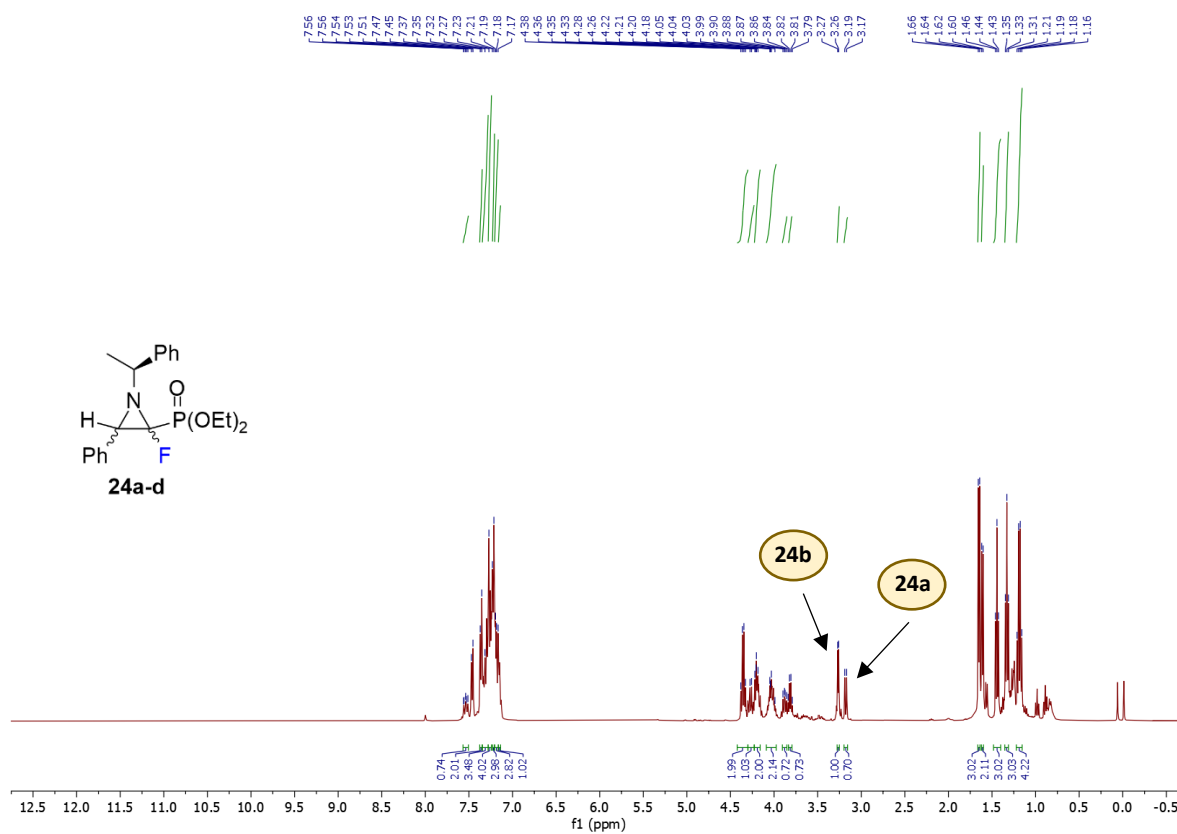

<sup>1</sup>H{<sup>31</sup>P} NMR of **24a-d**, *dr* 0.70:1:0.17:0.04

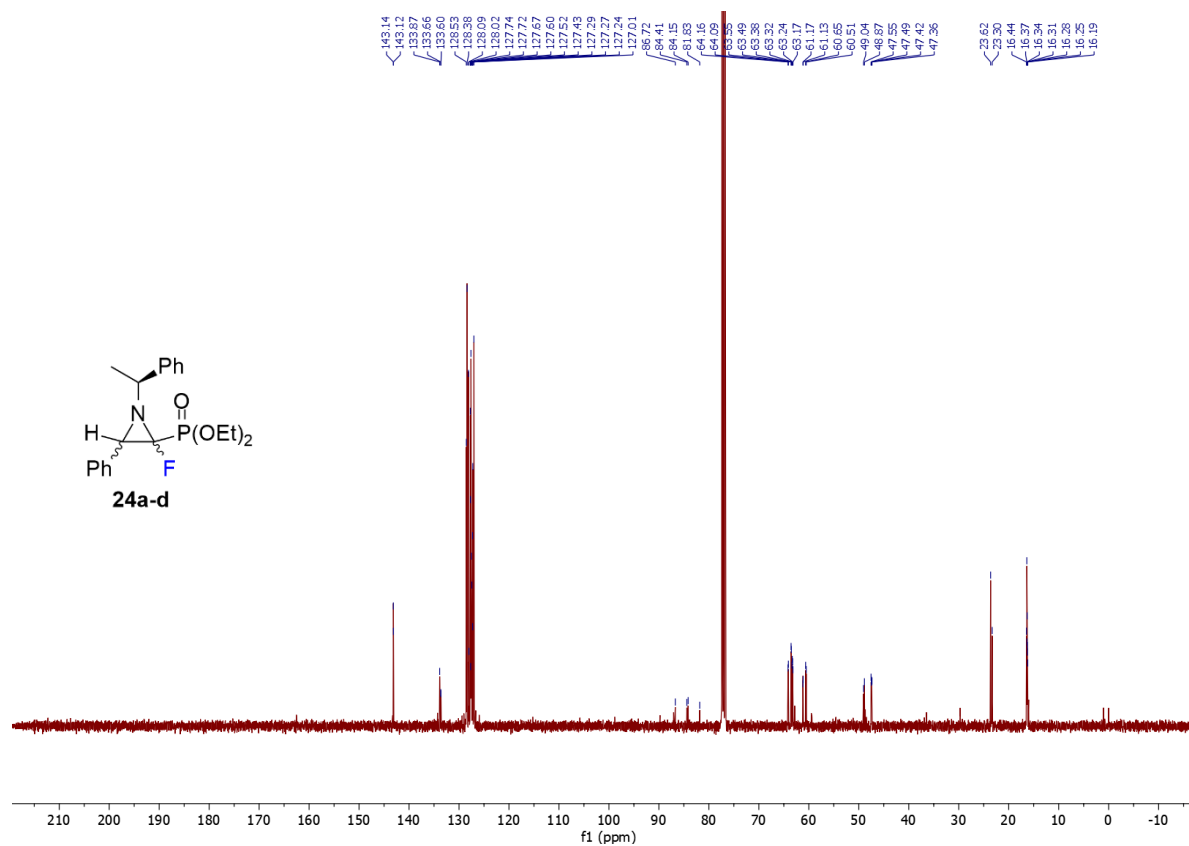

<sup>13</sup>C NMR of **24a-d**, *dr* 0.70:1:0.17:0.04

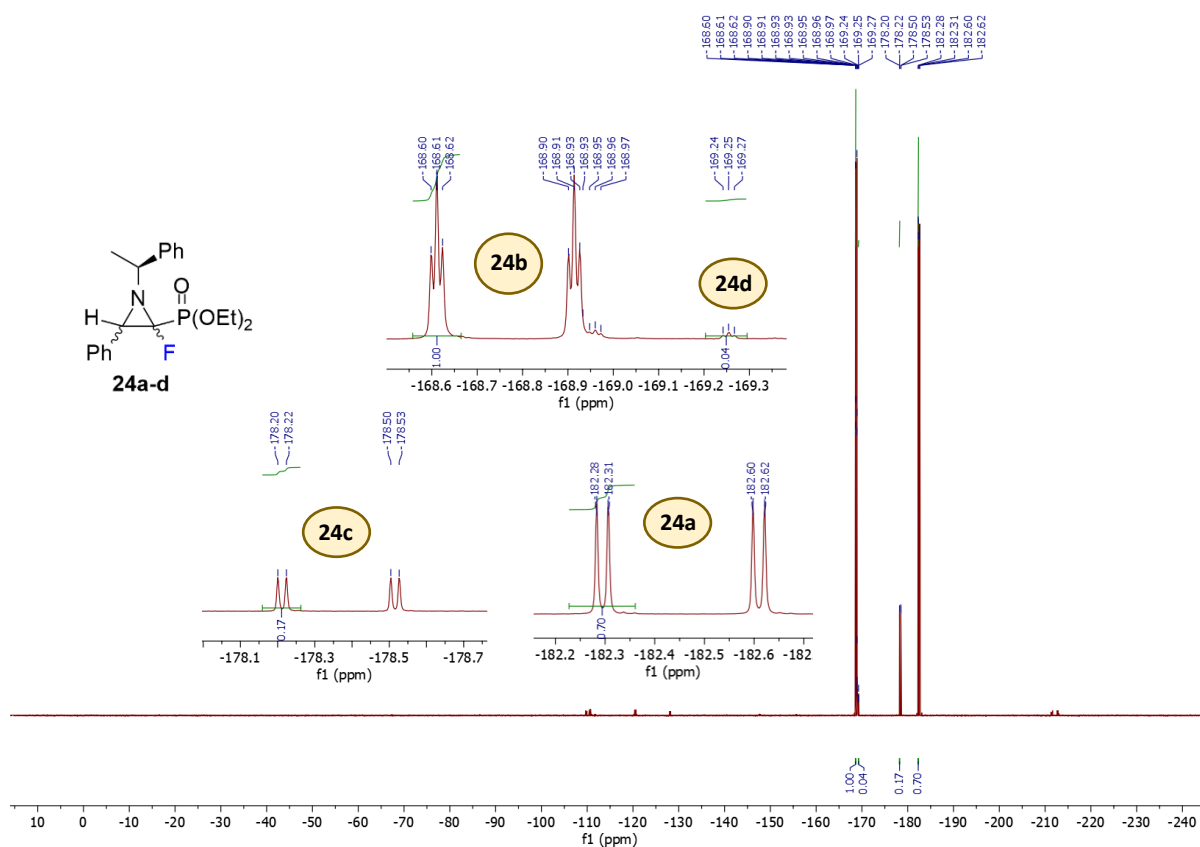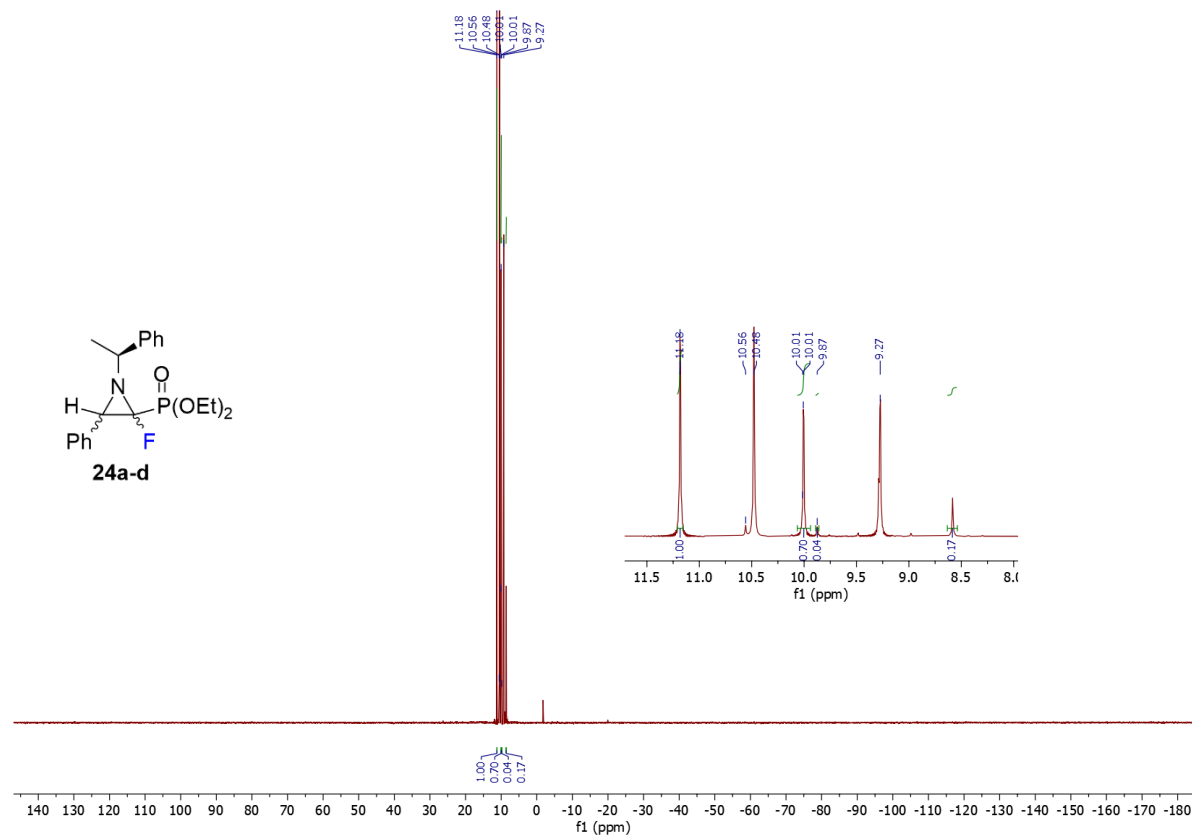

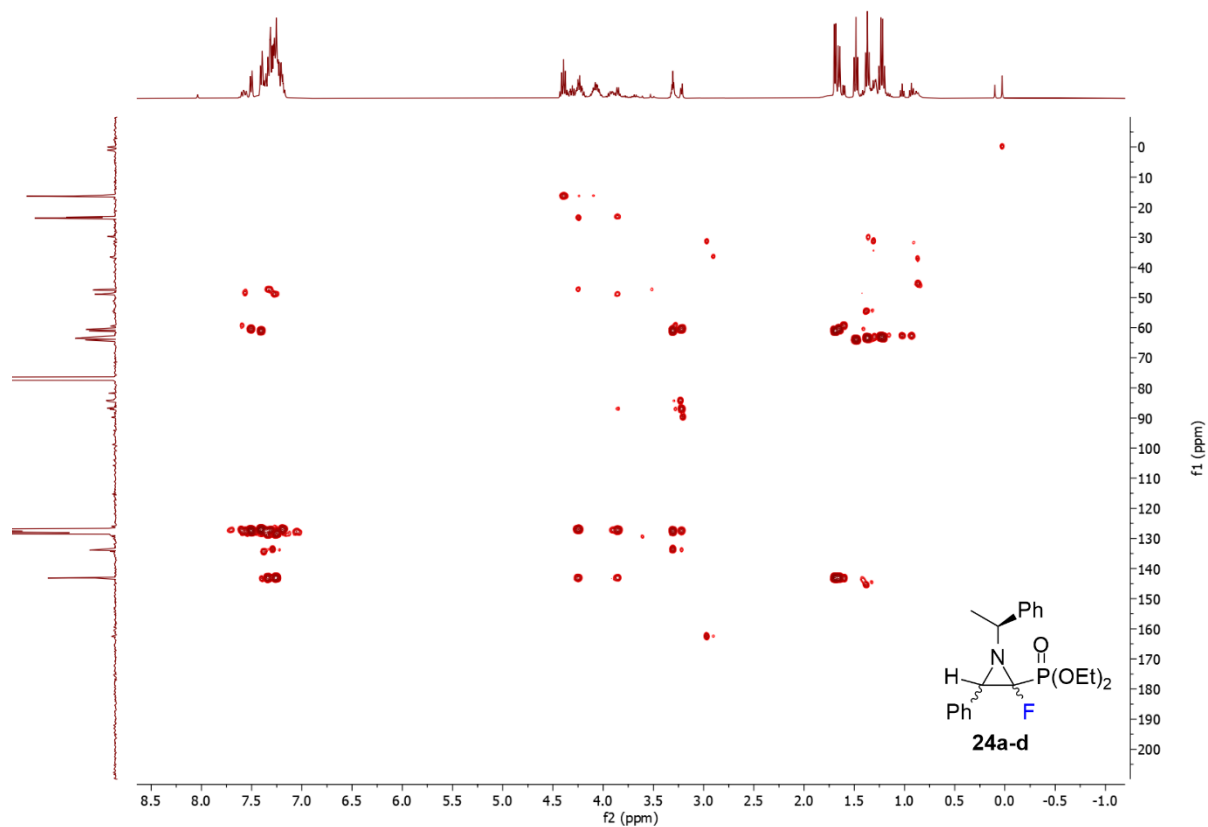

$^1\text{H}$ - $^{13}\text{C}$  HMBC NMR of **24a-d**, *dr* 1:0.70:0.04:0.17

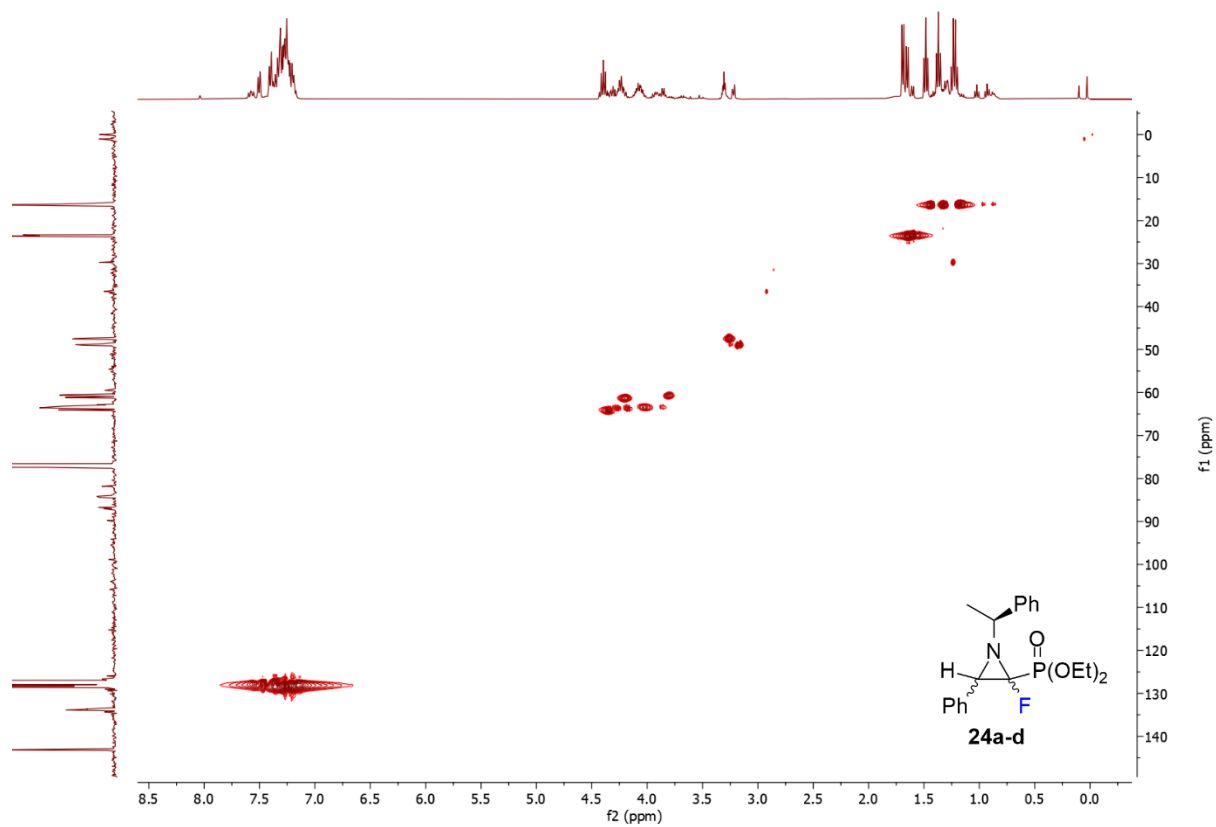

$^1\text{H}$ - $^{13}\text{C}$  HSQC NMR of **24a-d**, *dr* 1:0.70:0.04:0.17

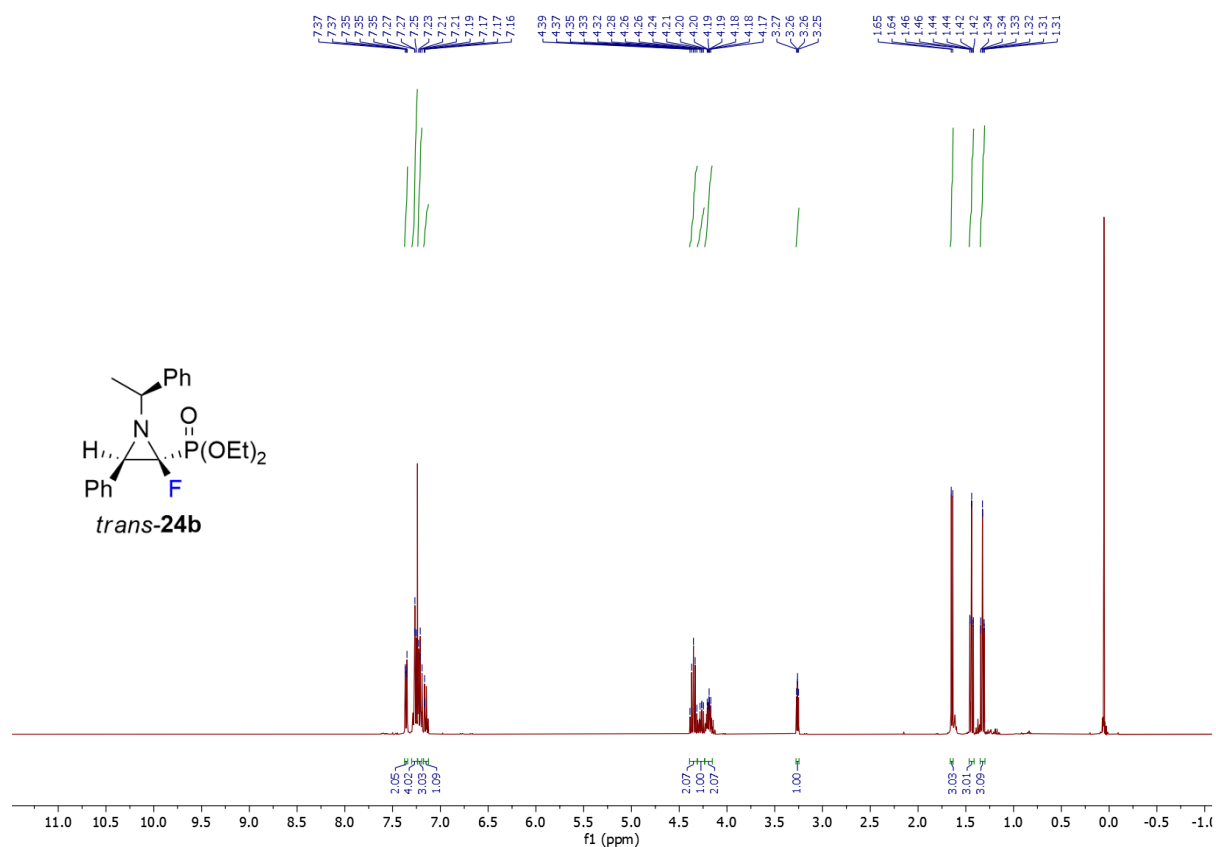

<sup>1</sup>H NMR of *trans*-24b

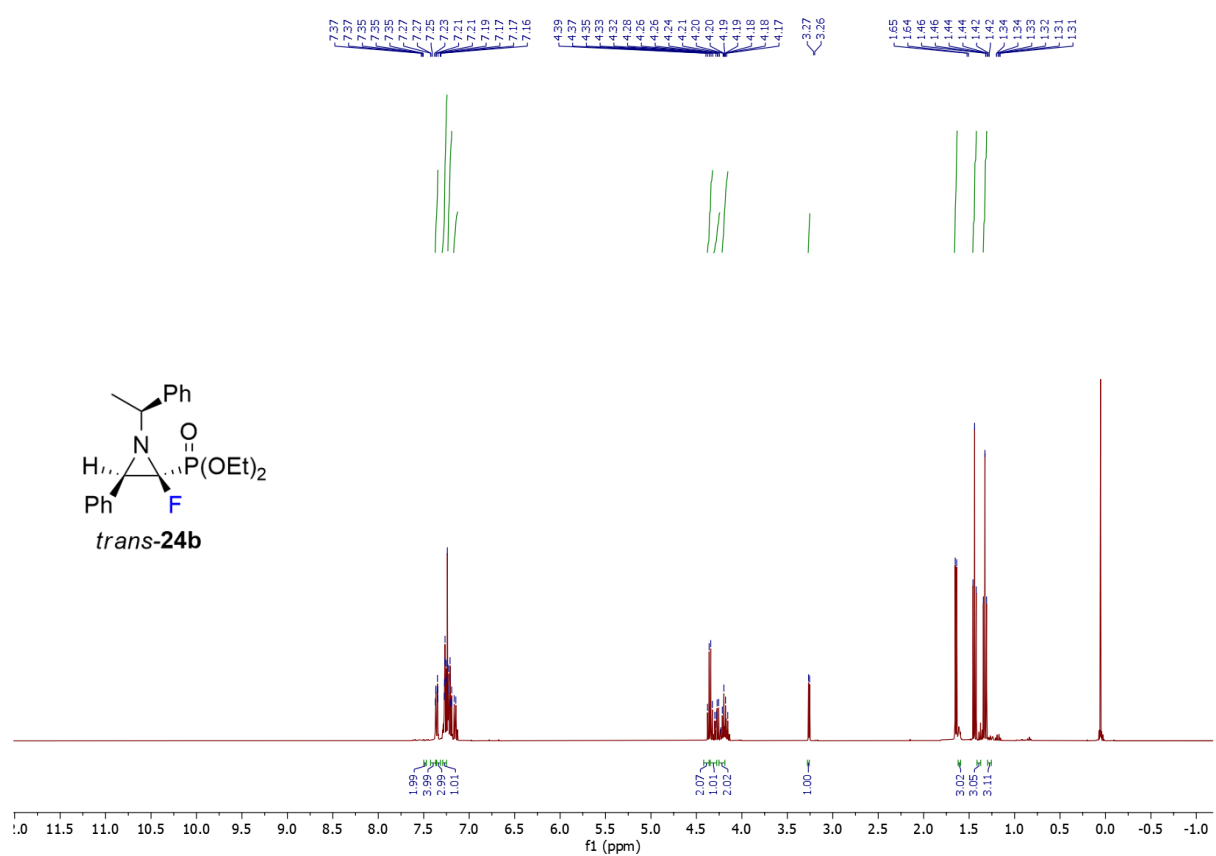

<sup>1</sup>H{<sup>19</sup>F} NMR of *trans*-24b

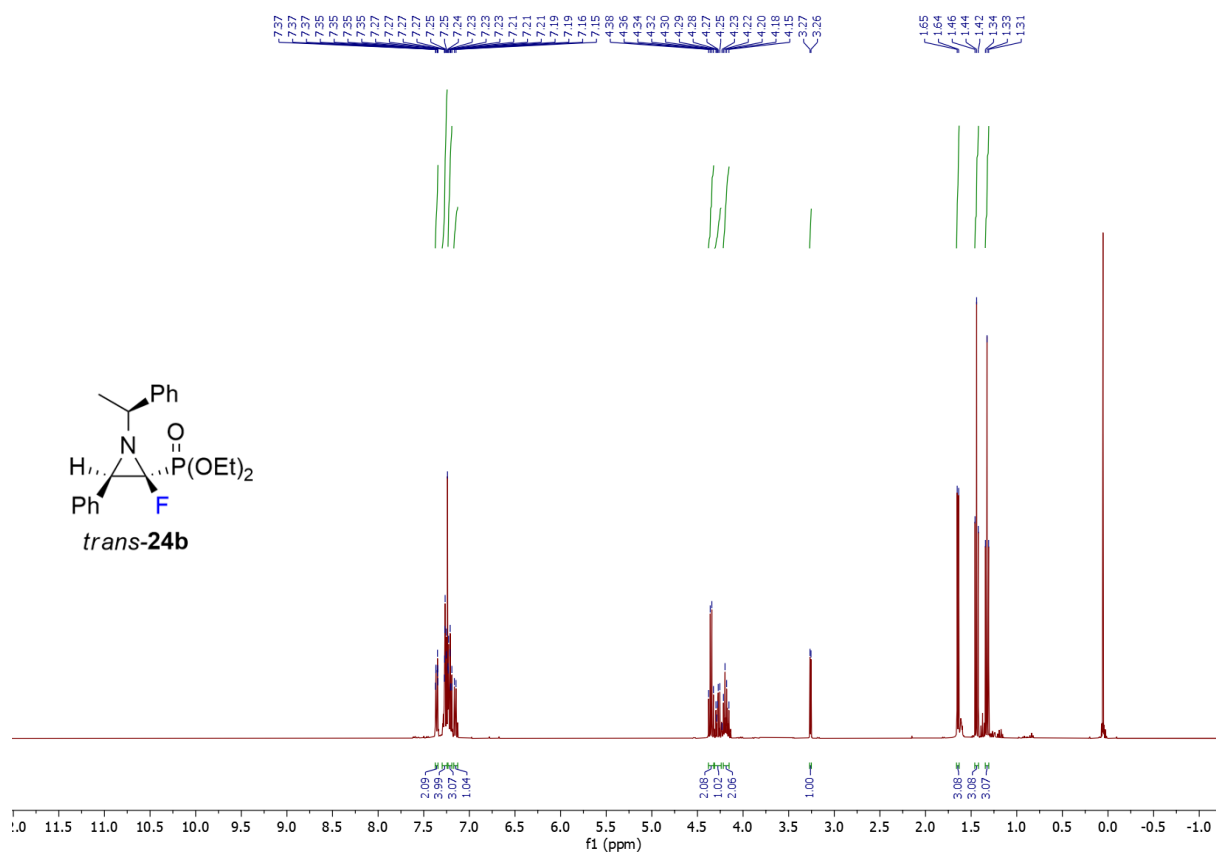

<sup>1</sup>H{<sup>31</sup>P} NMR of *trans*-24b

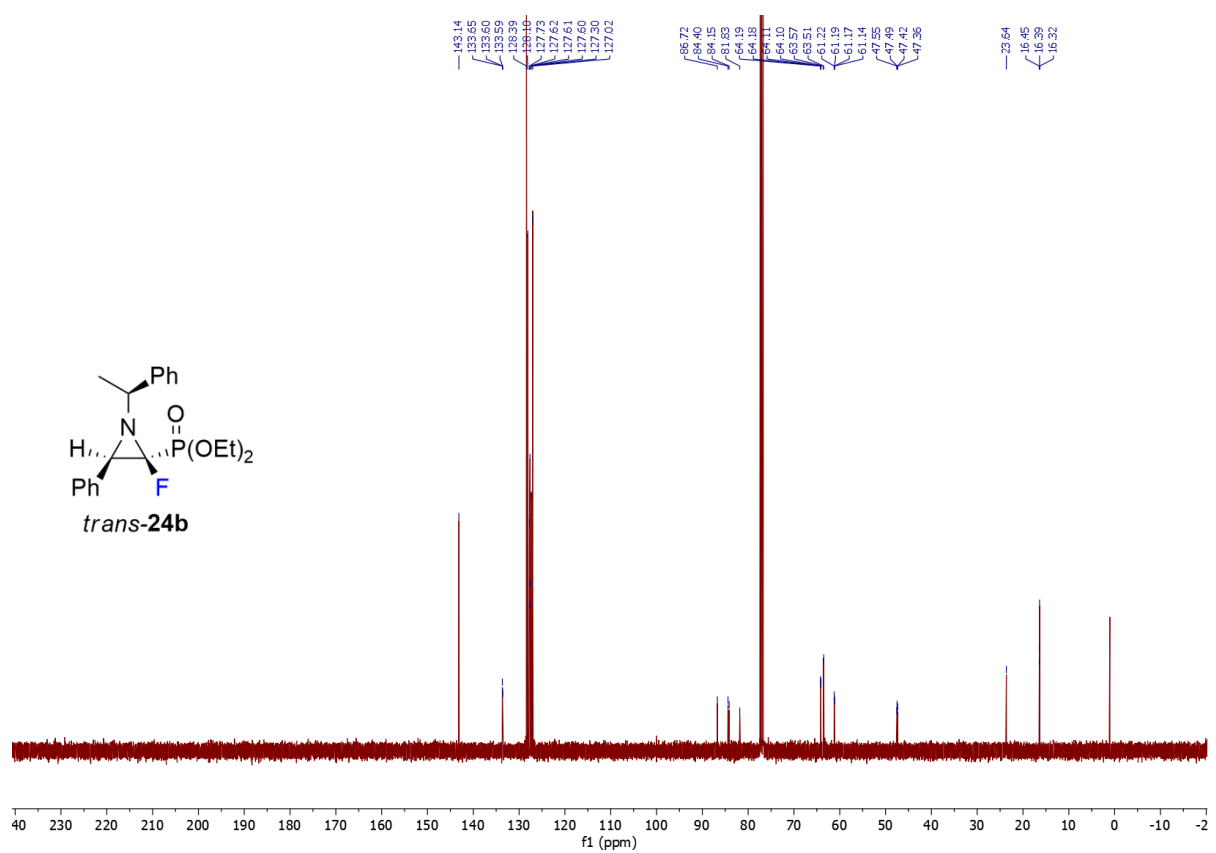

<sup>13</sup>C NMR of *trans*-24b

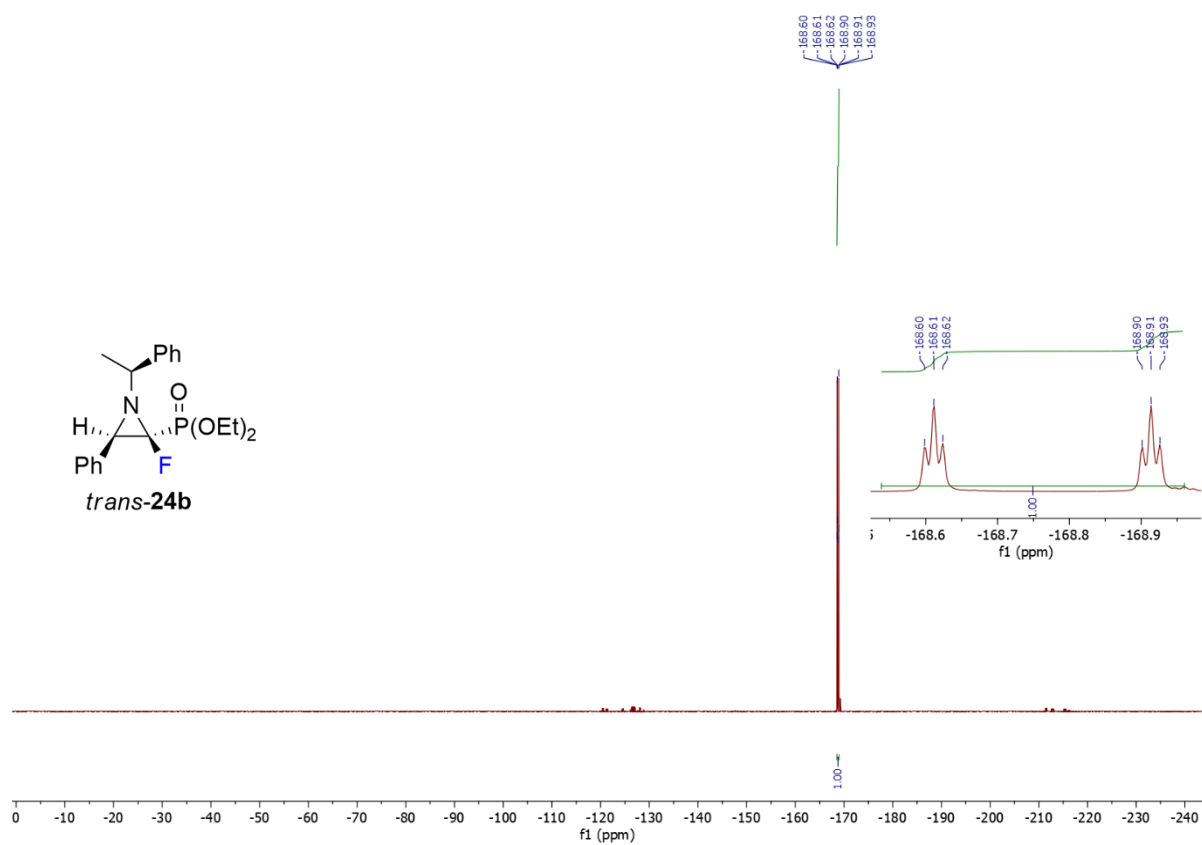

$^{19}\text{F}$  NMR of *trans*-**24b**

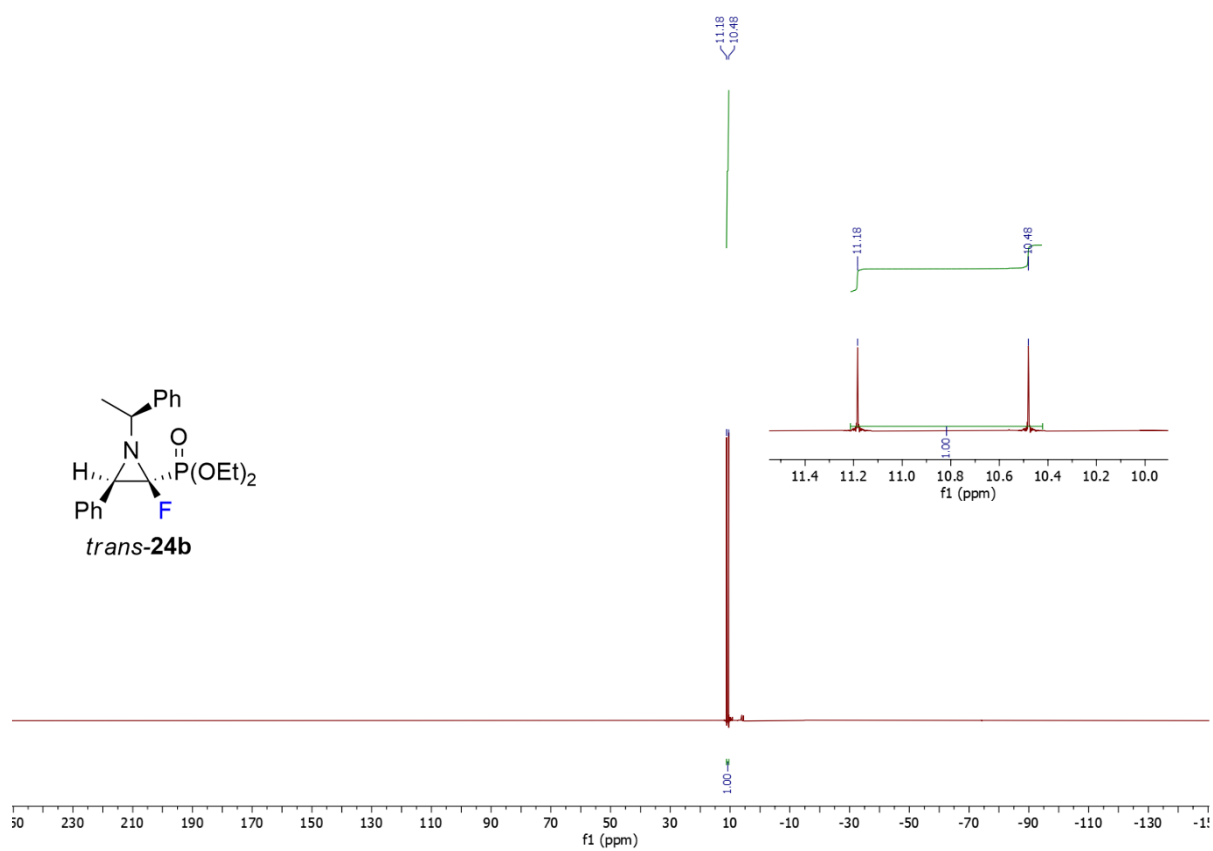

$^{31}\text{P}\{^1\text{H}\}$  NMR of *trans*-**24b**

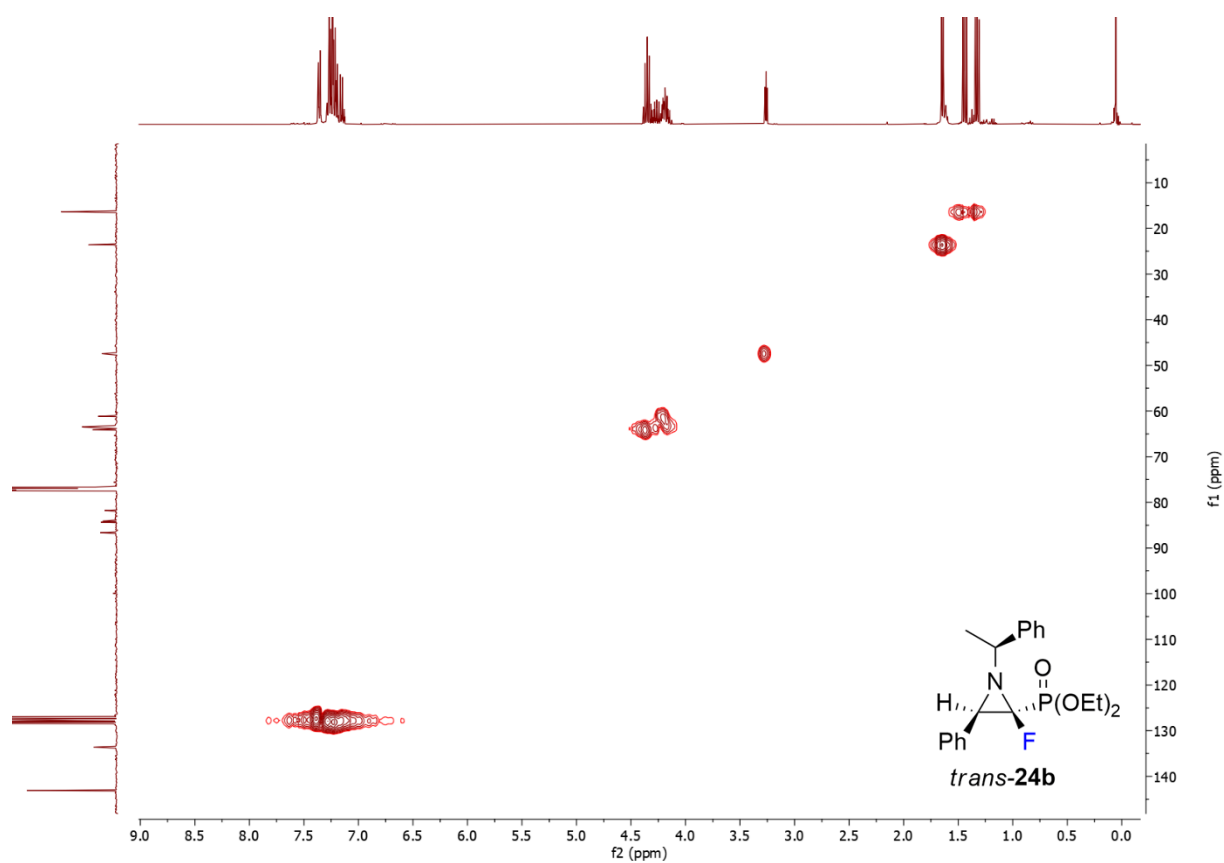

$^1\text{H}$ - $^{13}\text{C}$  HSQC NMR of *trans*-24b

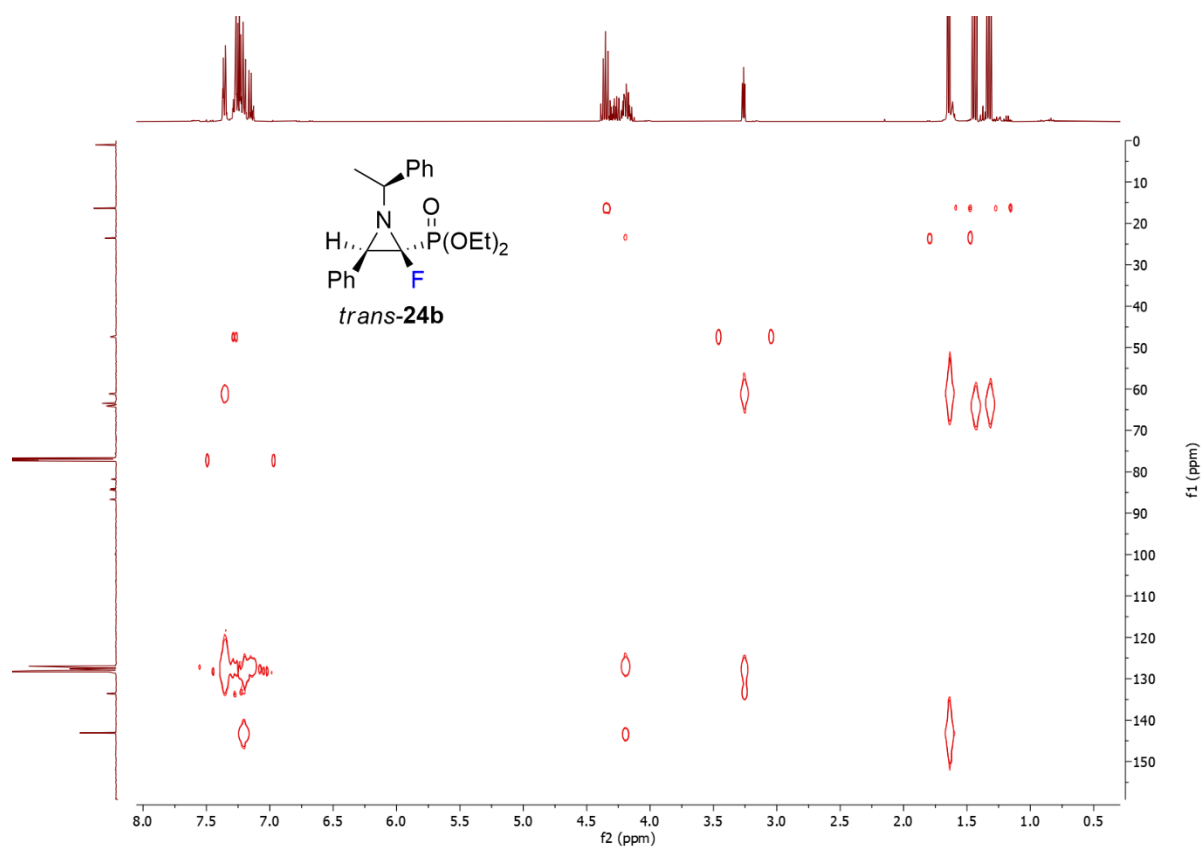

$^1\text{H}$ - $^{13}\text{C}$  HMBC NMR of *trans*-24b

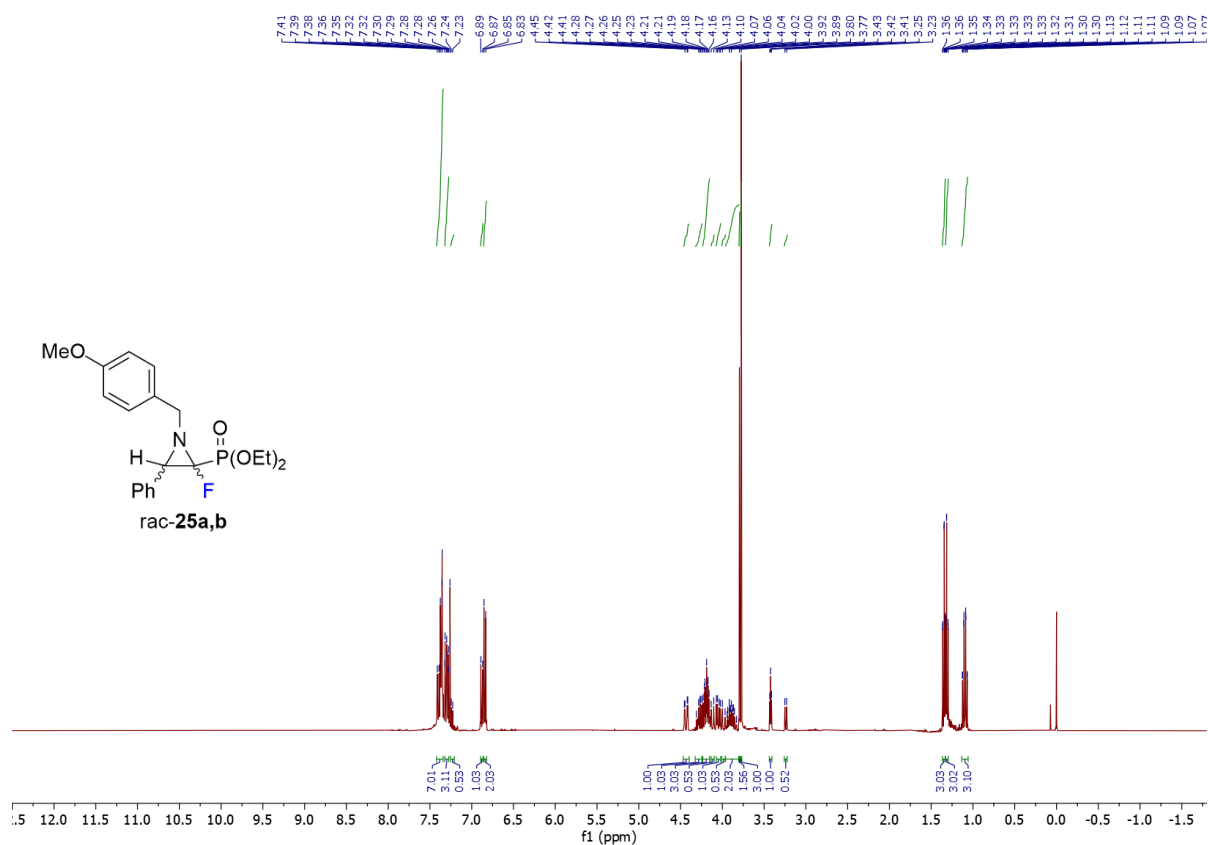

<sup>1</sup>H NMR of rac-25a,b *dr* 0.52:1

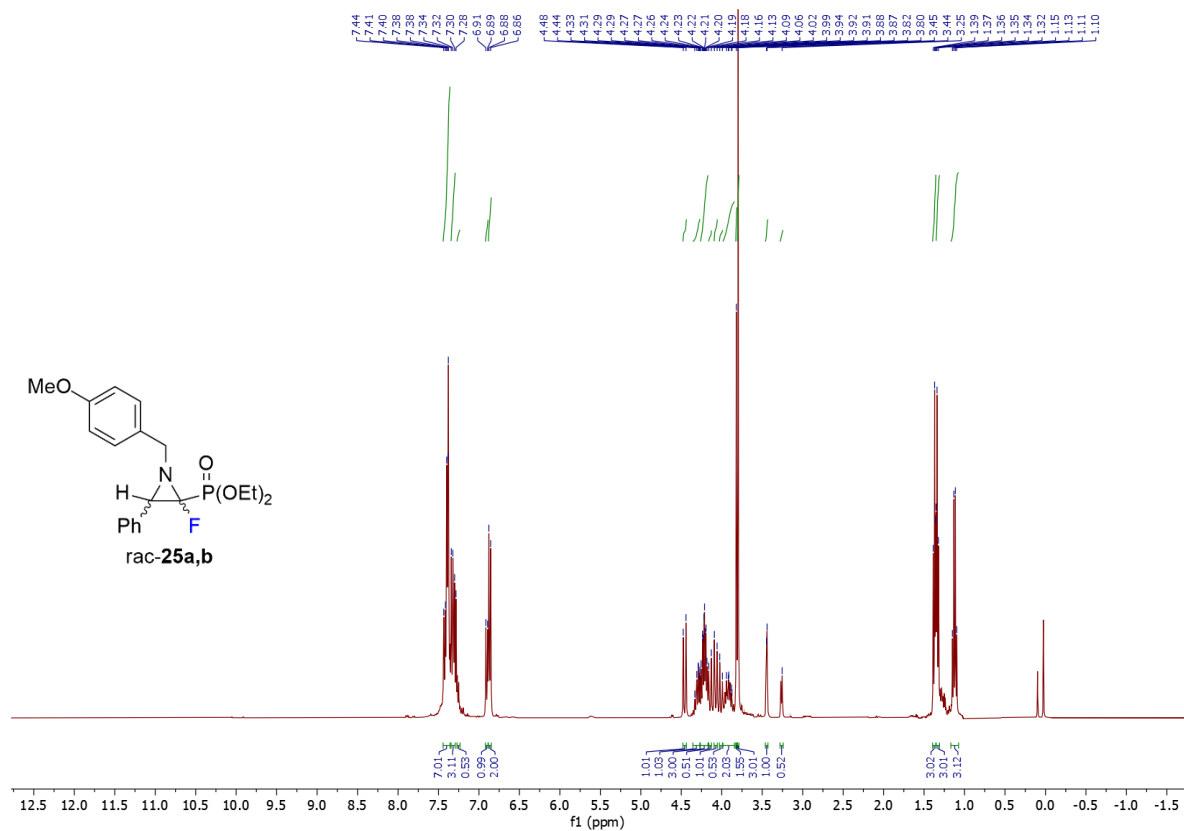

<sup>1</sup>H{<sup>19</sup>F} NMR of rac-25a,b *dr* 0.52:1





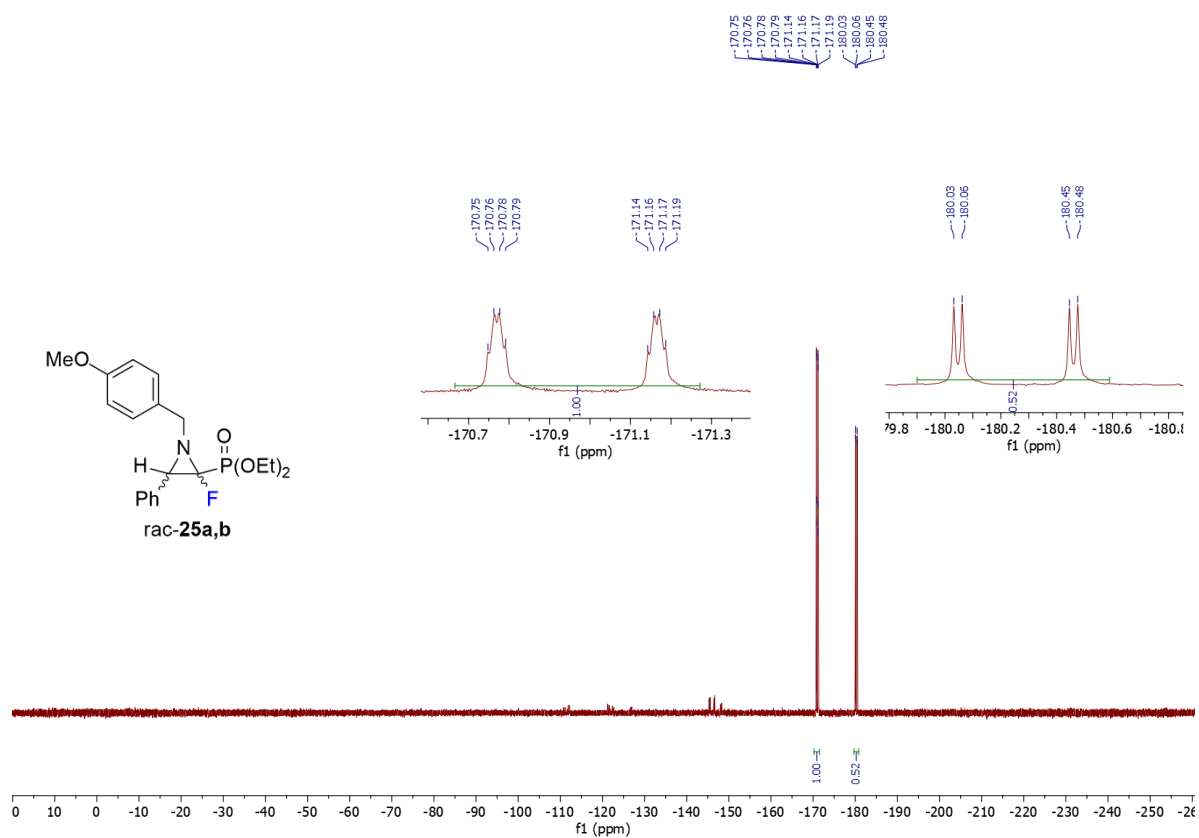

$^{19}\text{F}$  NMR of **rac-25a,b** *dr* 0.52:1

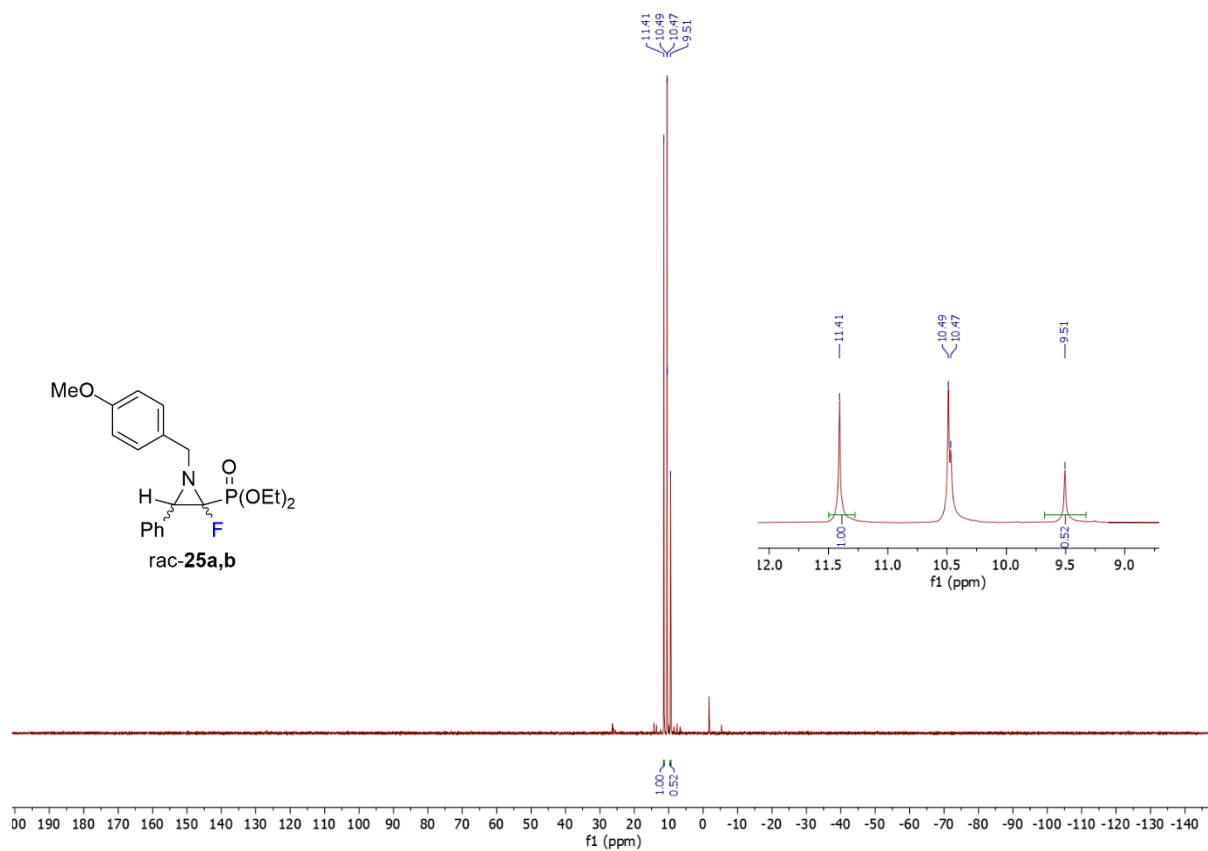

$^{31}\text{P}\{^1\text{H}\}$  NMR of **rac-25a,b** *dr* 0.52:1

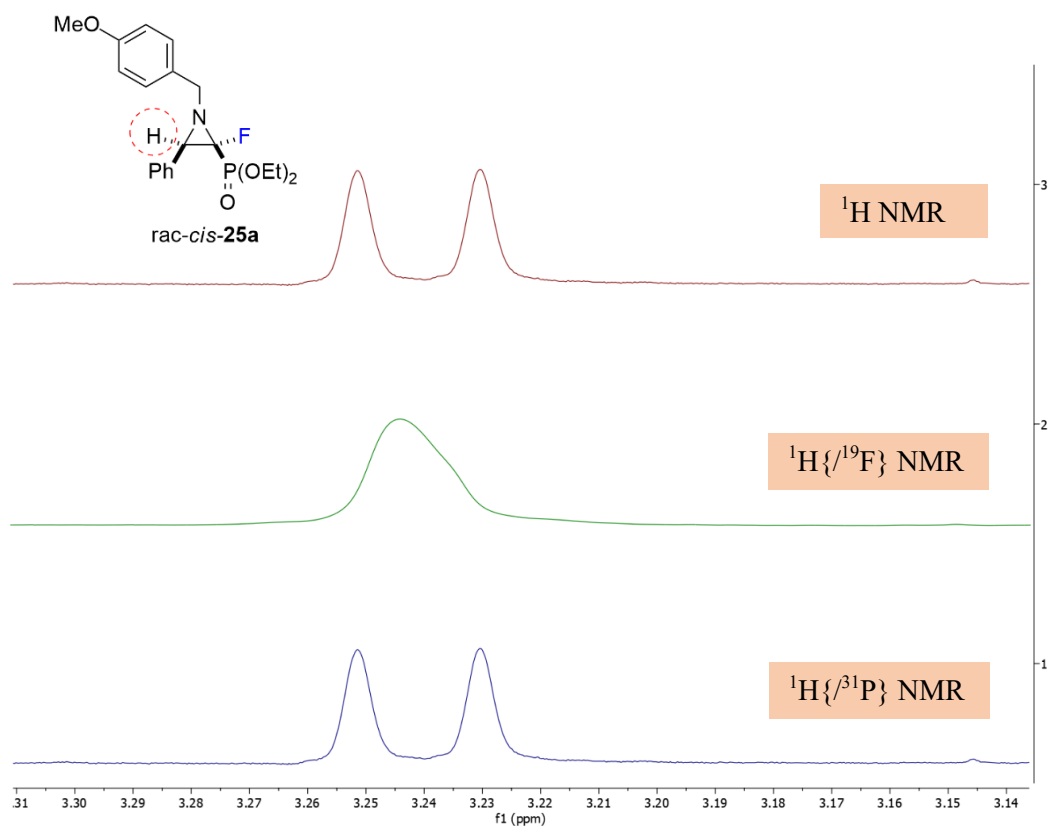

Aziridine proton decoupling of **rac-cis-25a**

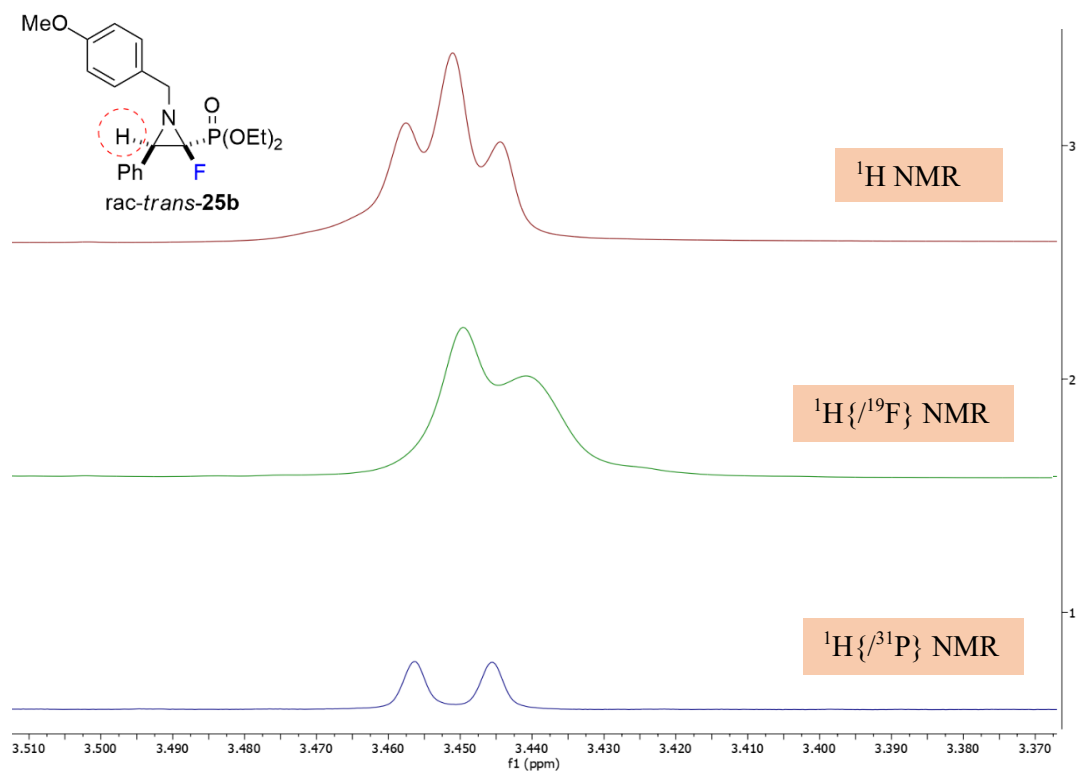

Aziridine proton decoupling of **rac-trans-25b**





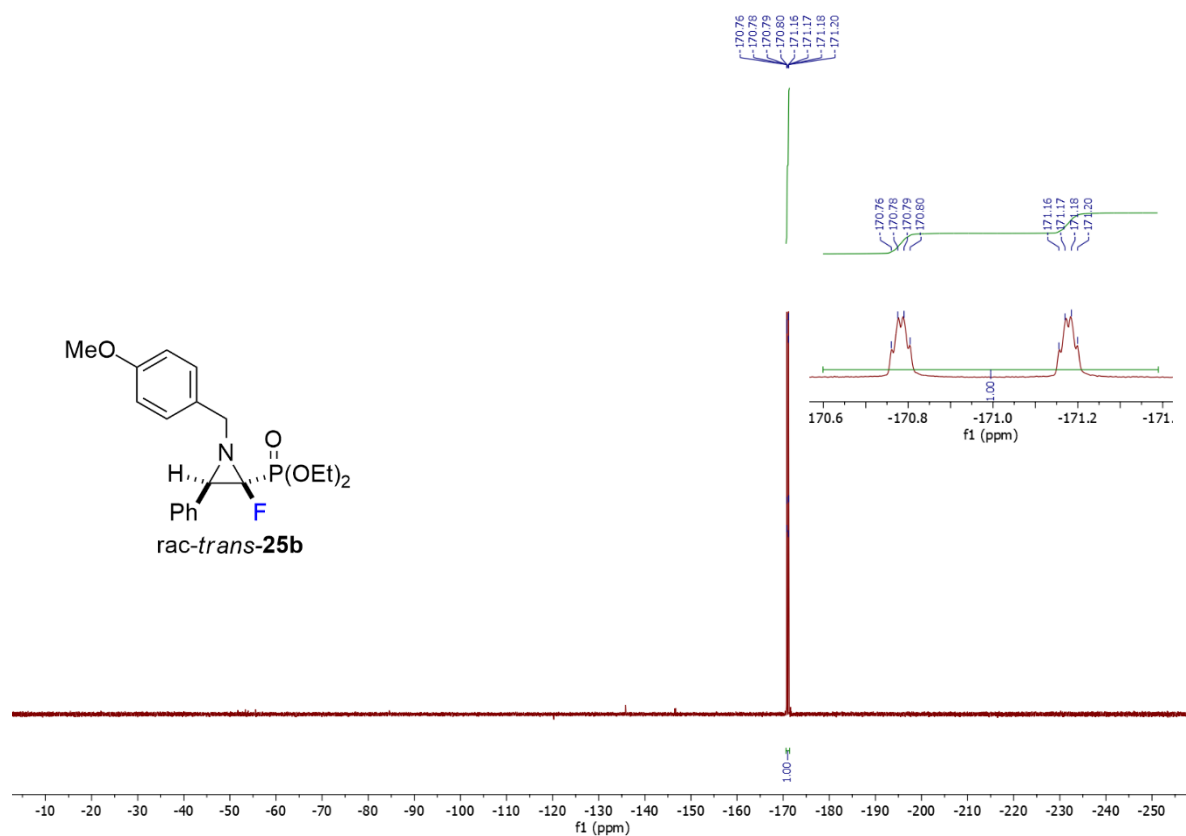

$^{19}\text{F}$  NMR of *rac-trans*-**25b**

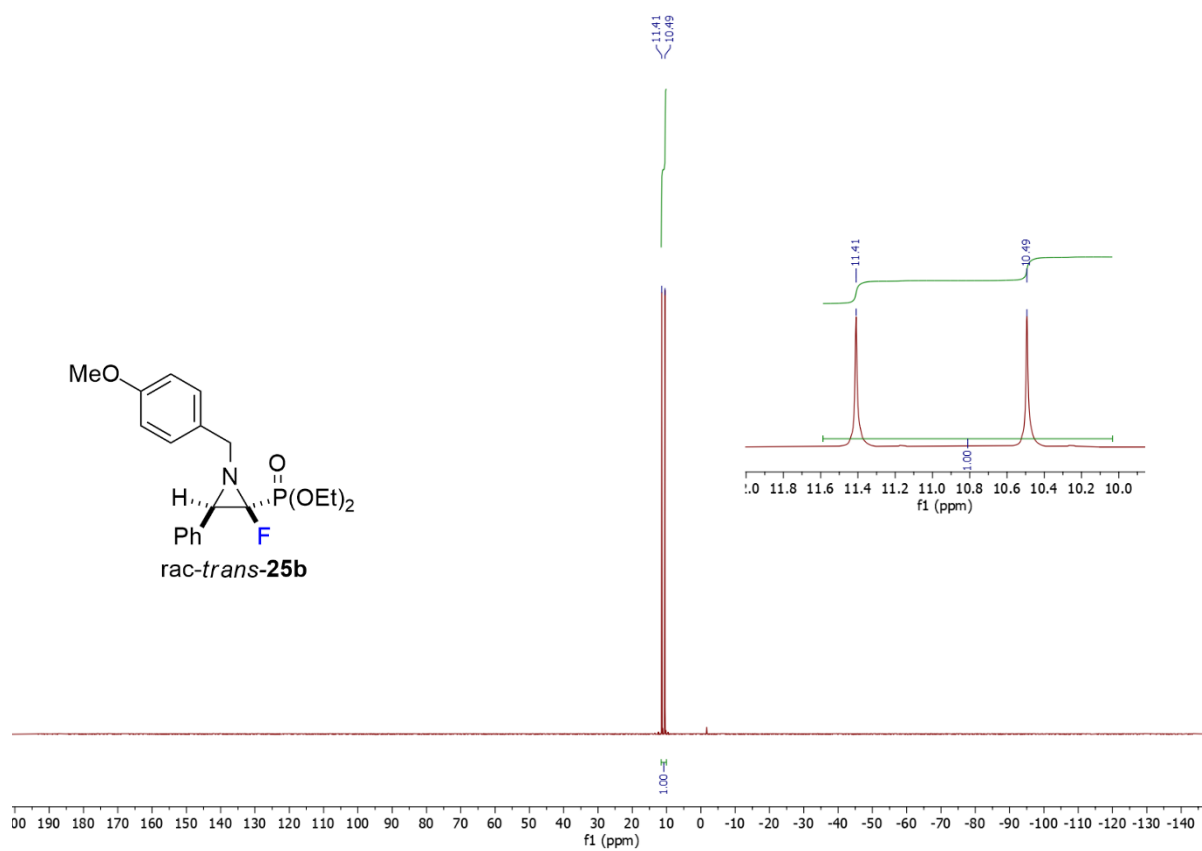

$^{31}\text{P}\{^1\text{H}\}$  NMR of *rac-trans*-**25b**

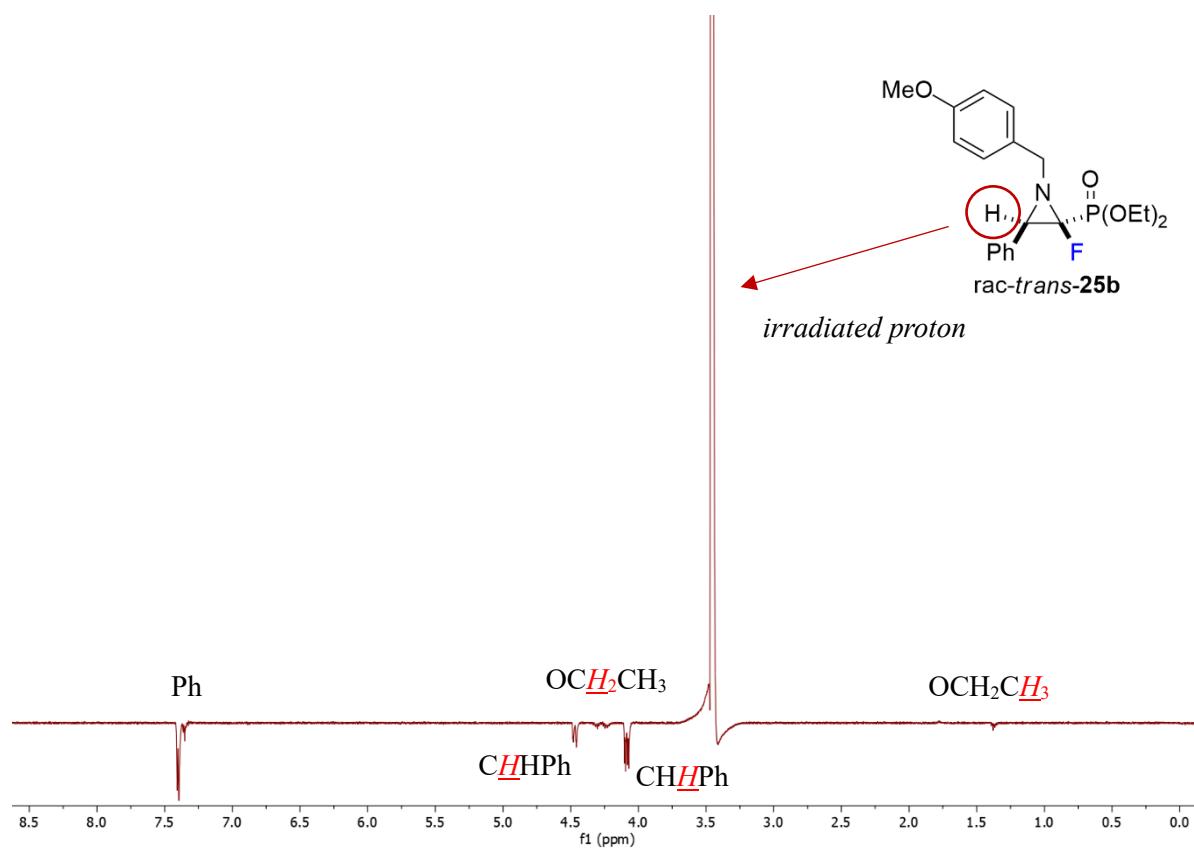

1D  $^1\text{H}$ - $^1\text{H}$  NOE NMR of **rac-trans-25b**

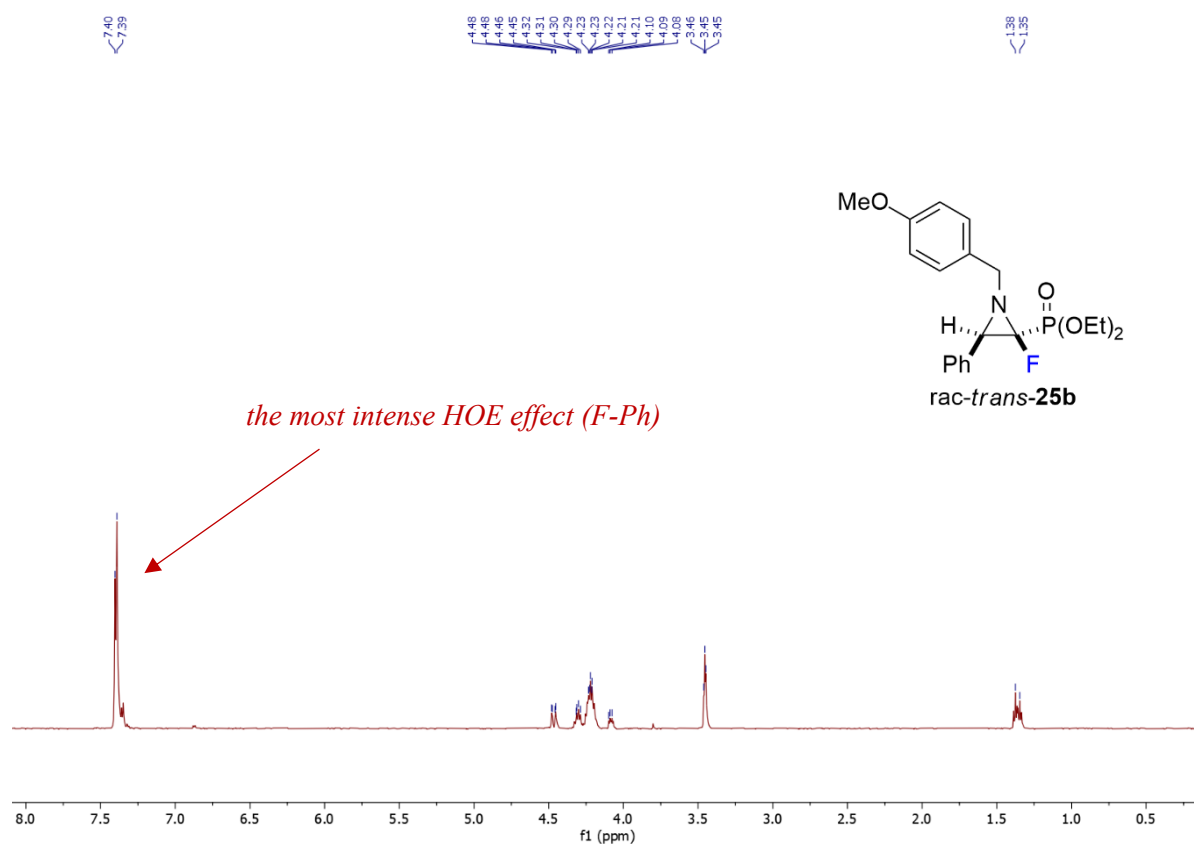

1D  $^1\text{H}$ - $^{19}\text{F}$  NOE NMR of **rac-trans-25b**

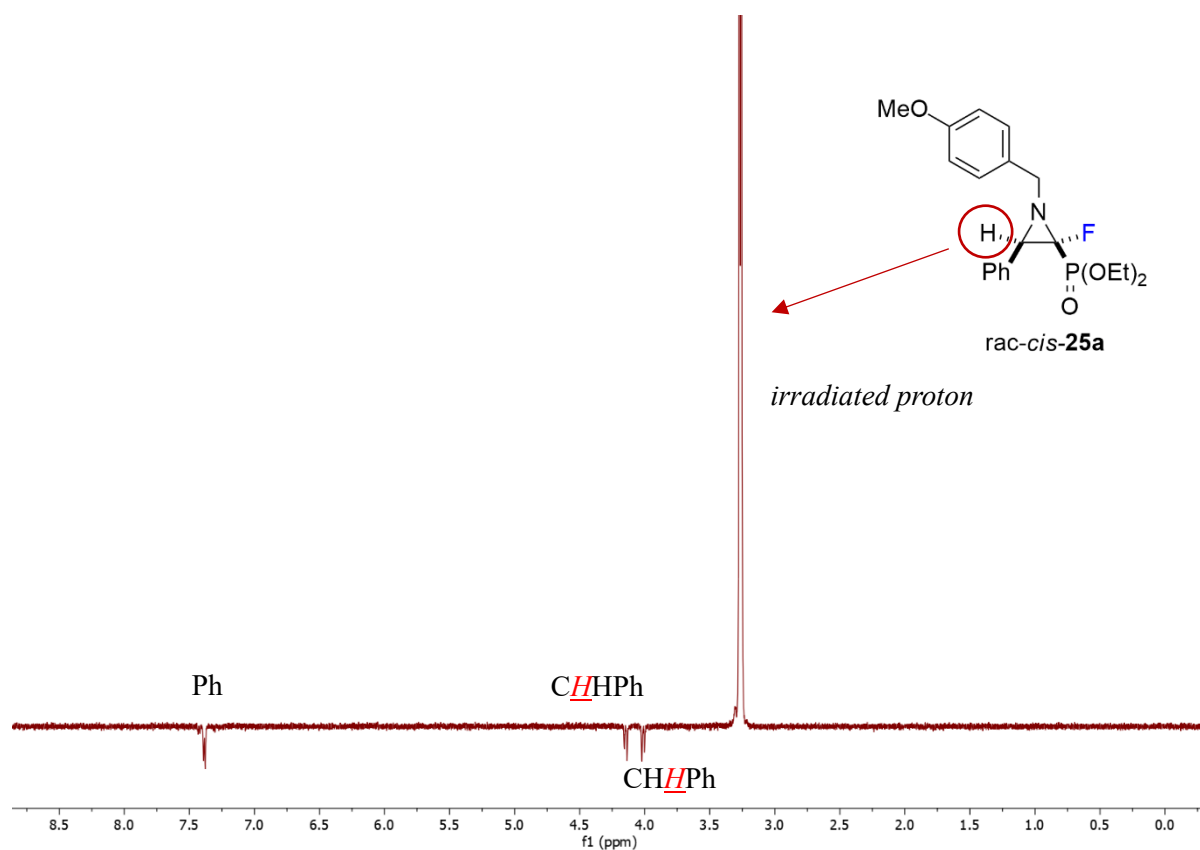

1D <sup>1</sup>H-<sup>1</sup>H NOE NMR of **rac-cis-25a**

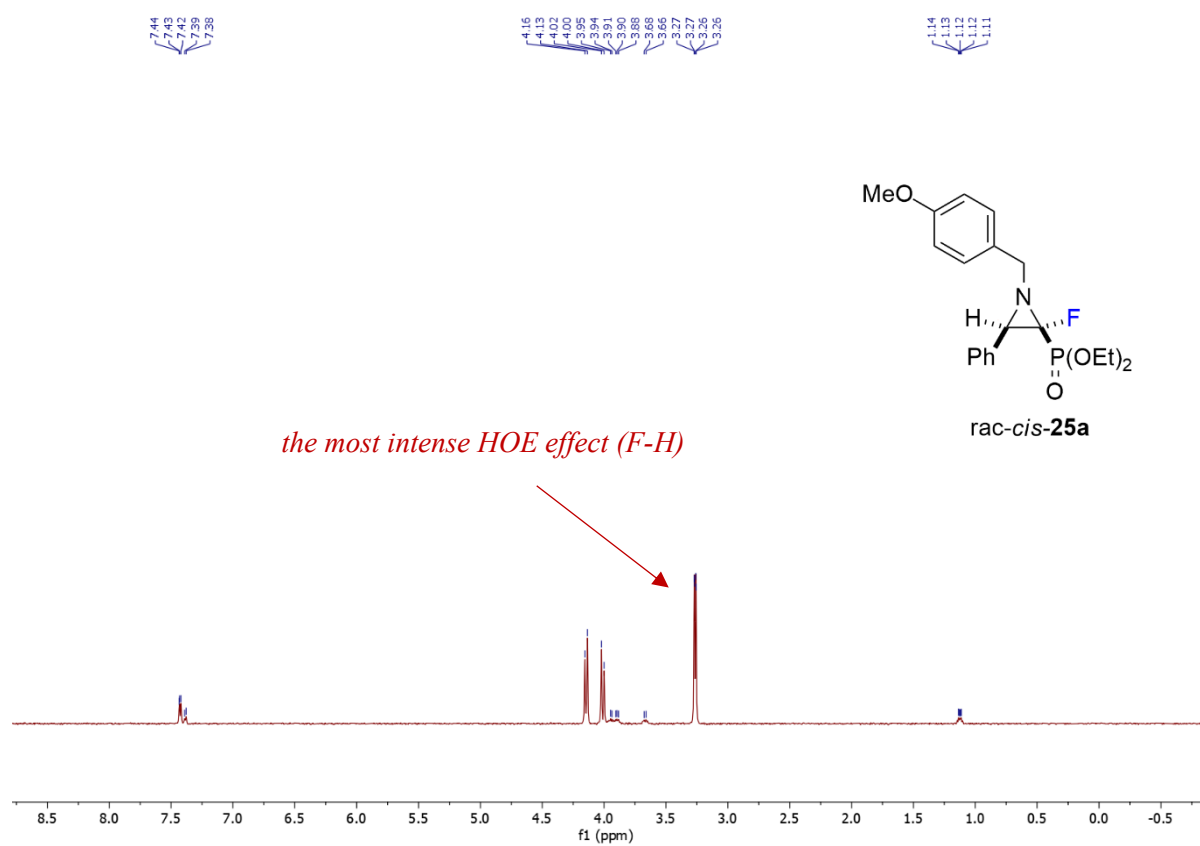

1D <sup>1</sup>H-<sup>19</sup>F NOE NMR of **rac-cis-25a**



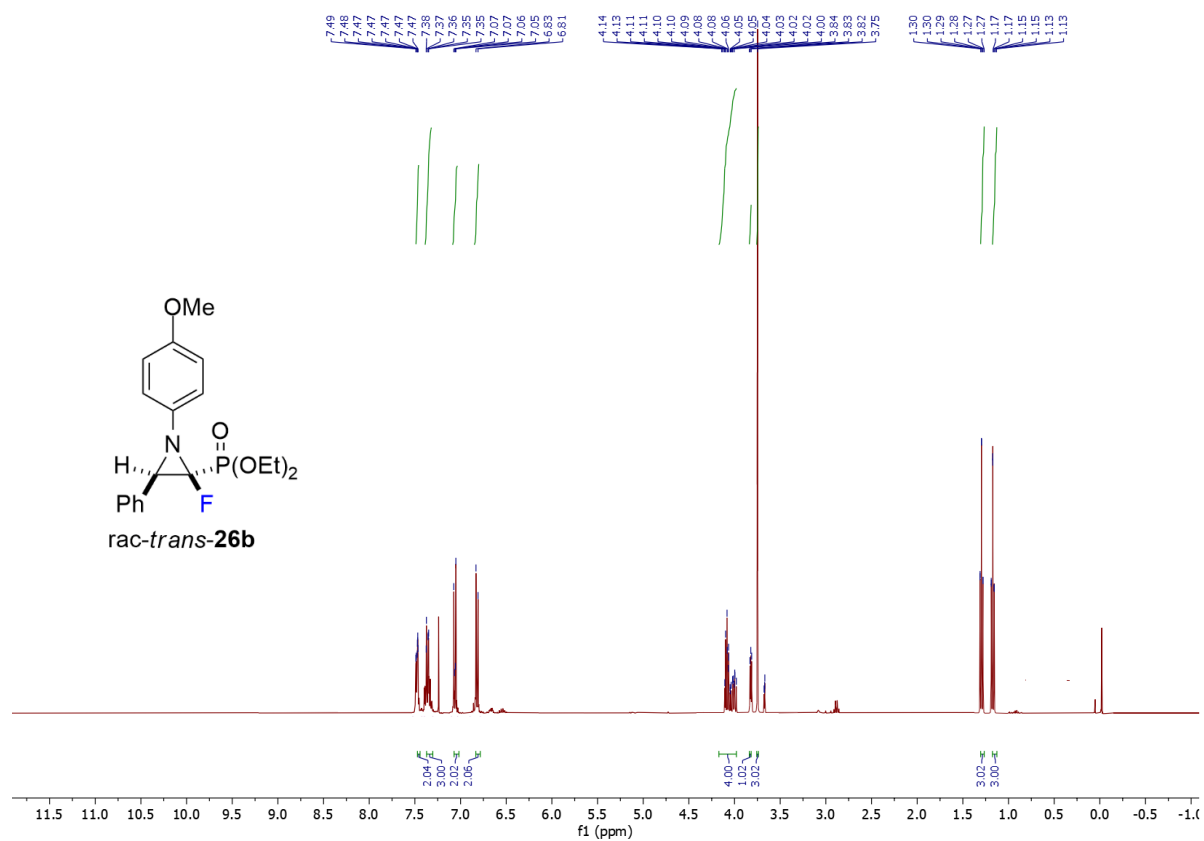

<sup>1</sup>H NMR of *rac-trans*-26b

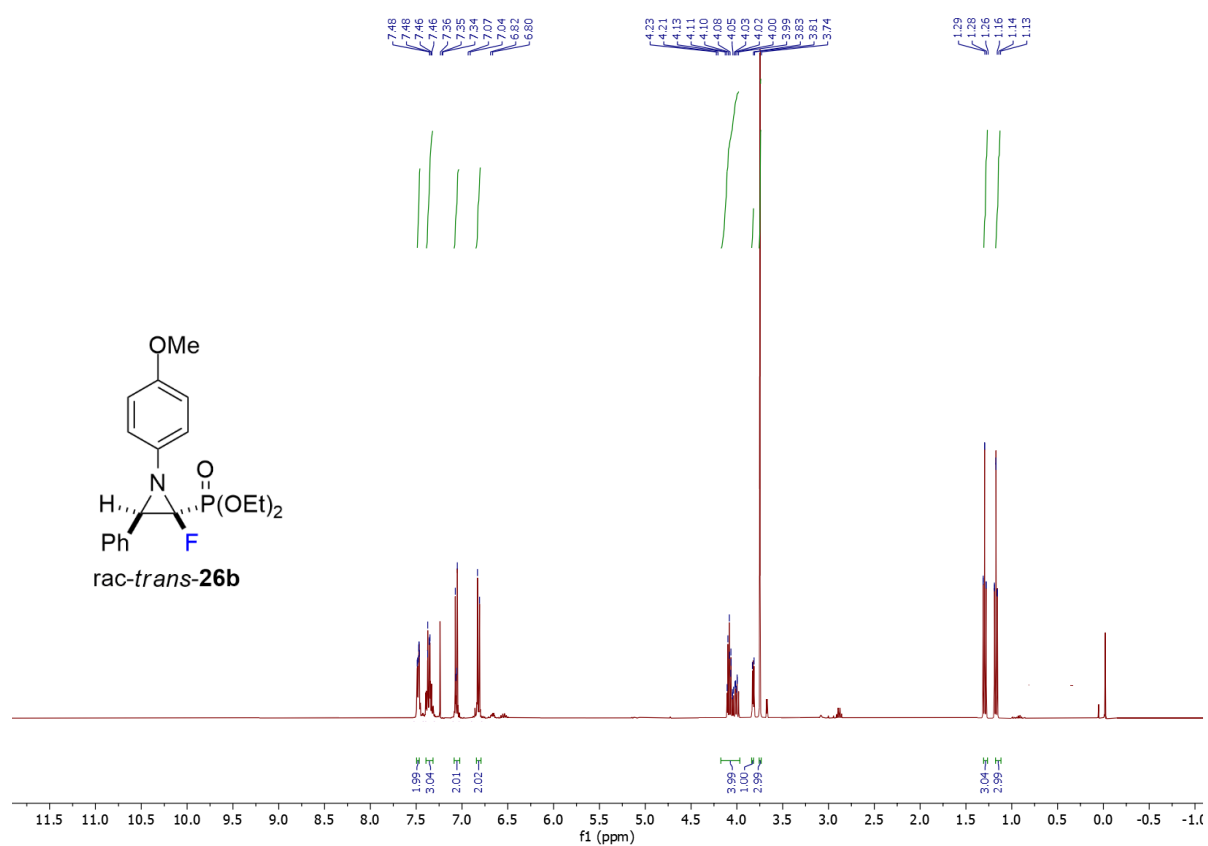

<sup>1</sup>H{<sup>31</sup>P} NMR of *rac-trans*-26b

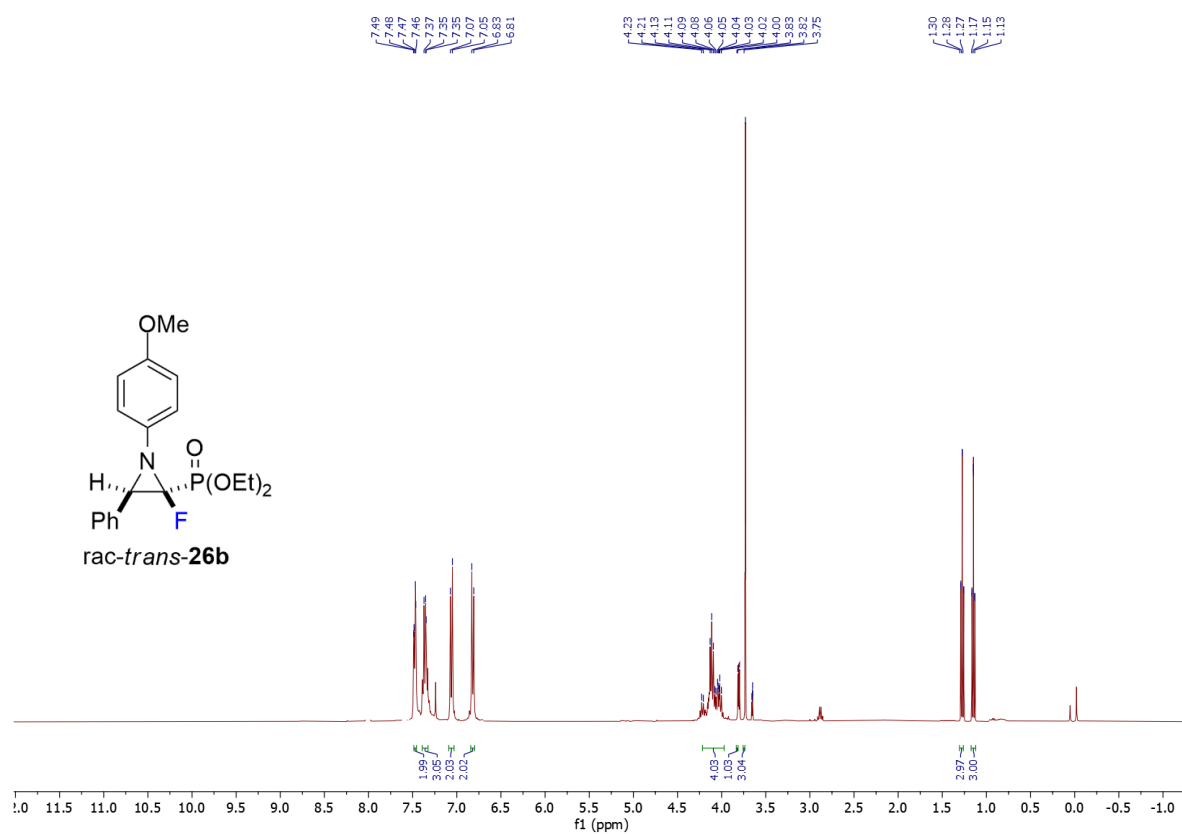

$^1\text{H}\{^{19}\text{F}\}$  NMR of *rac-trans*-**26b**

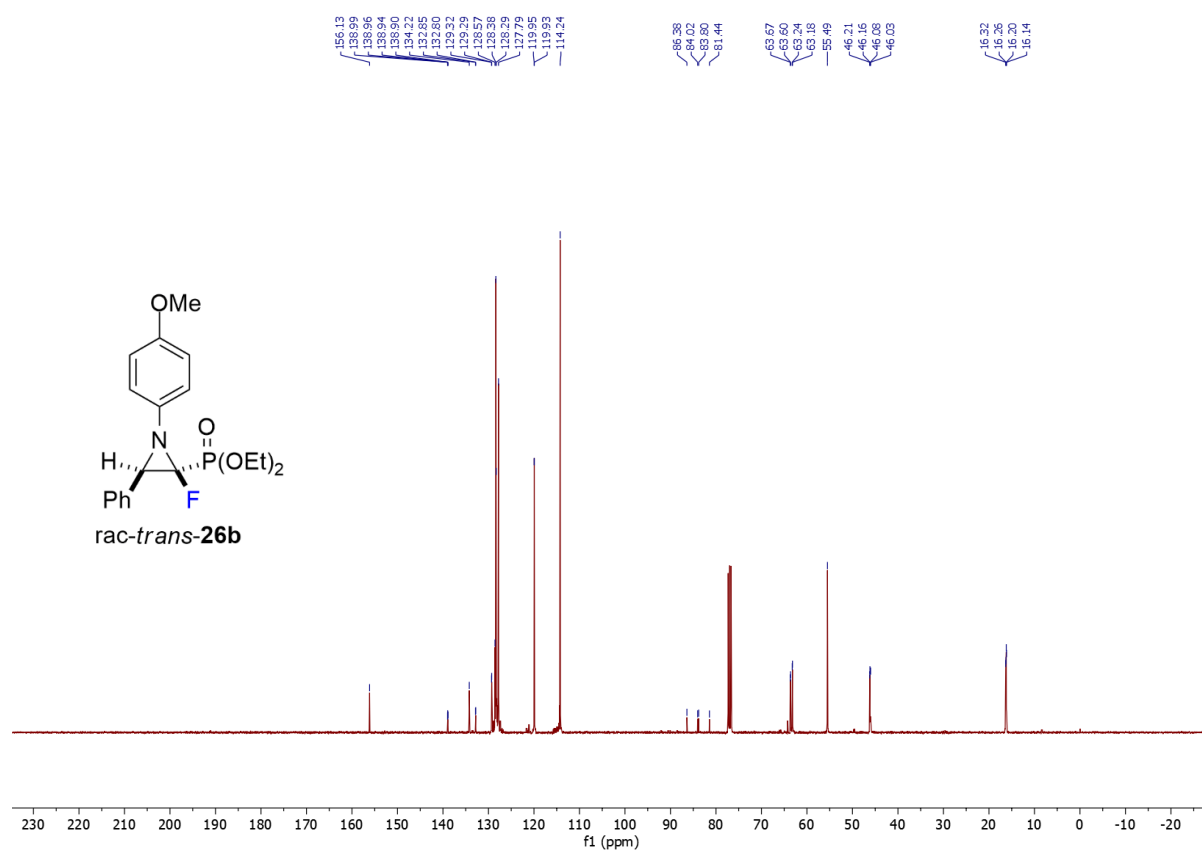

$^{13}\text{C}$  NMR of *rac-trans*-**26b**

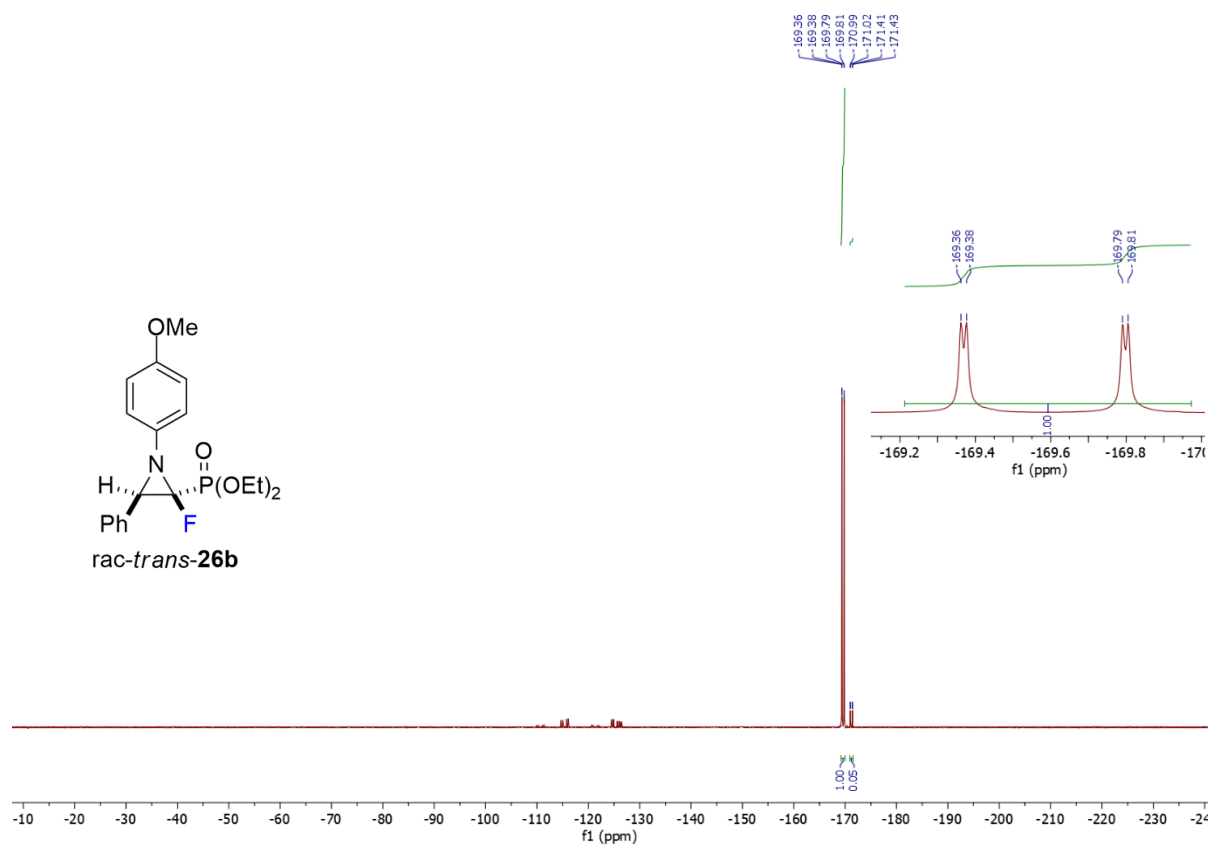

$^{19}\text{F}$  NMR of *rac-trans*-**26b**

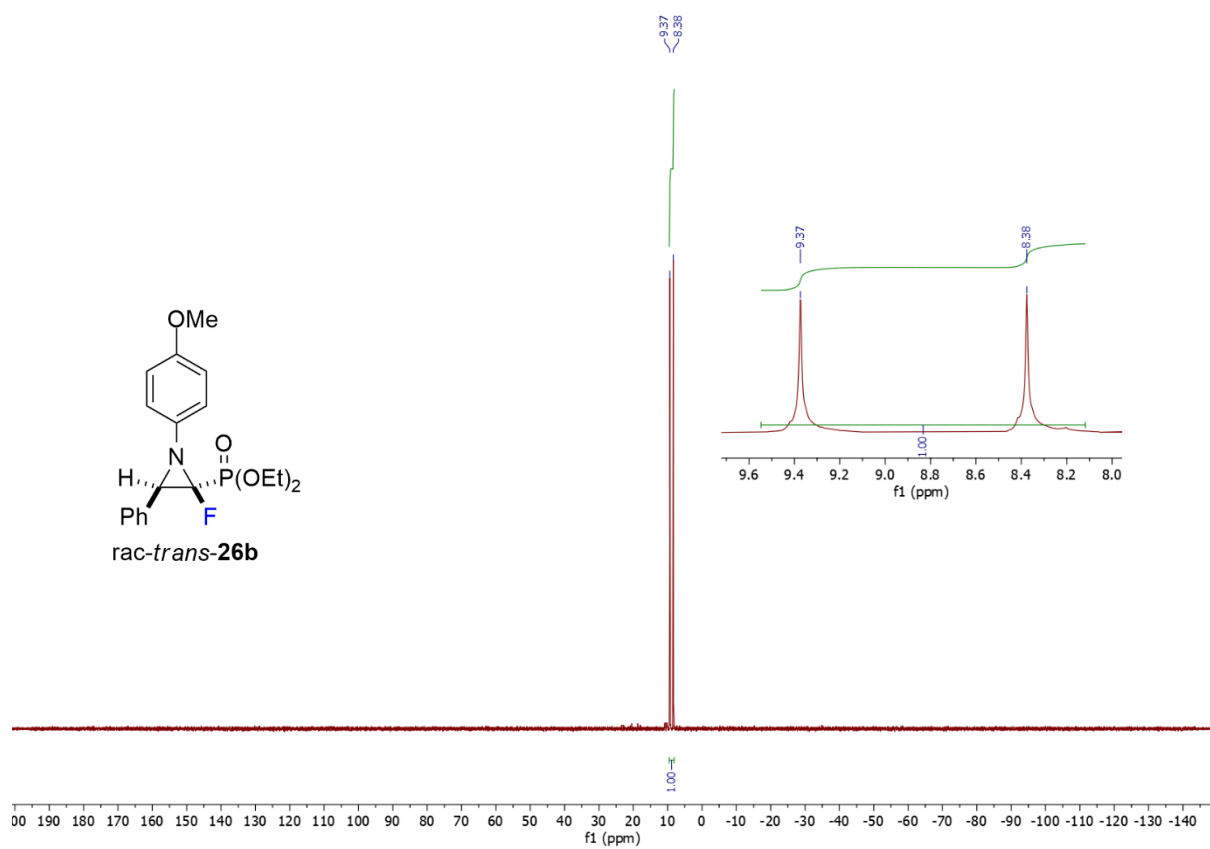

$^{31}\text{P}\{^1\text{H}\}$  NMR of *rac-trans*-**26b**

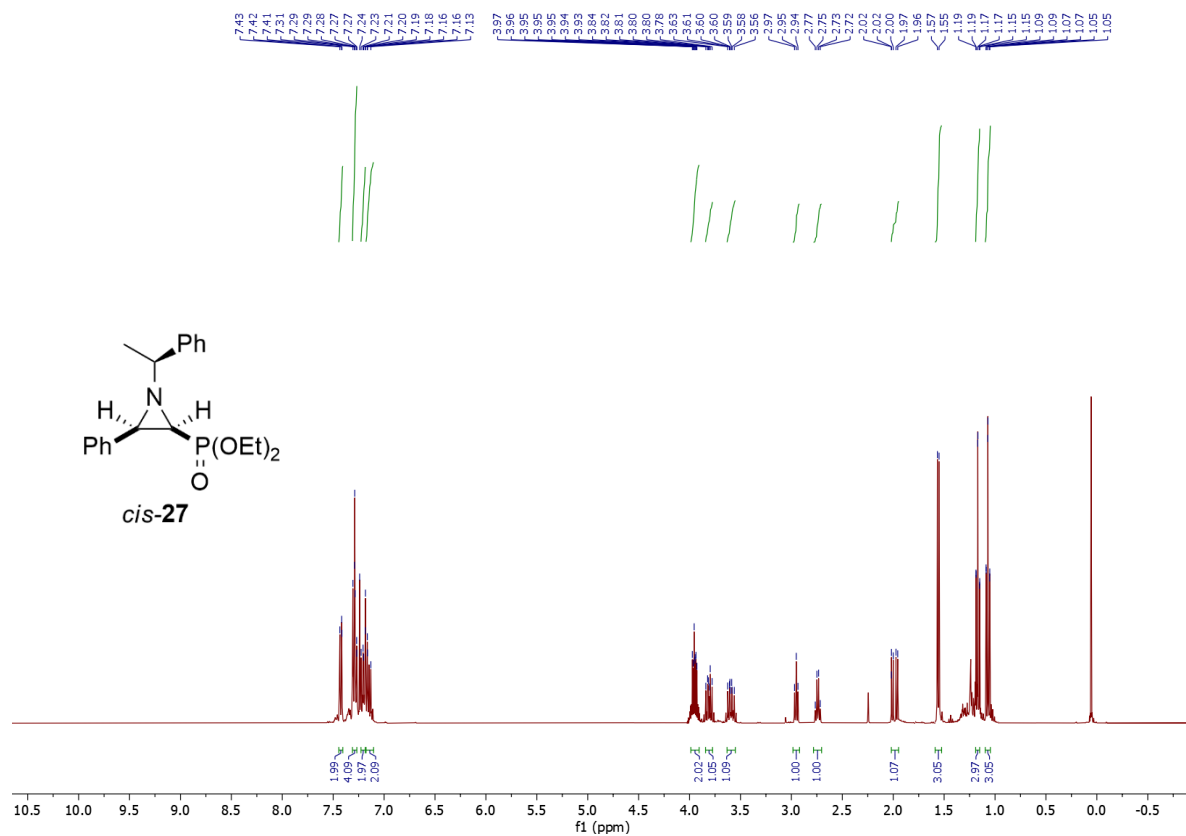

<sup>1</sup>H NMR of *cis*-27

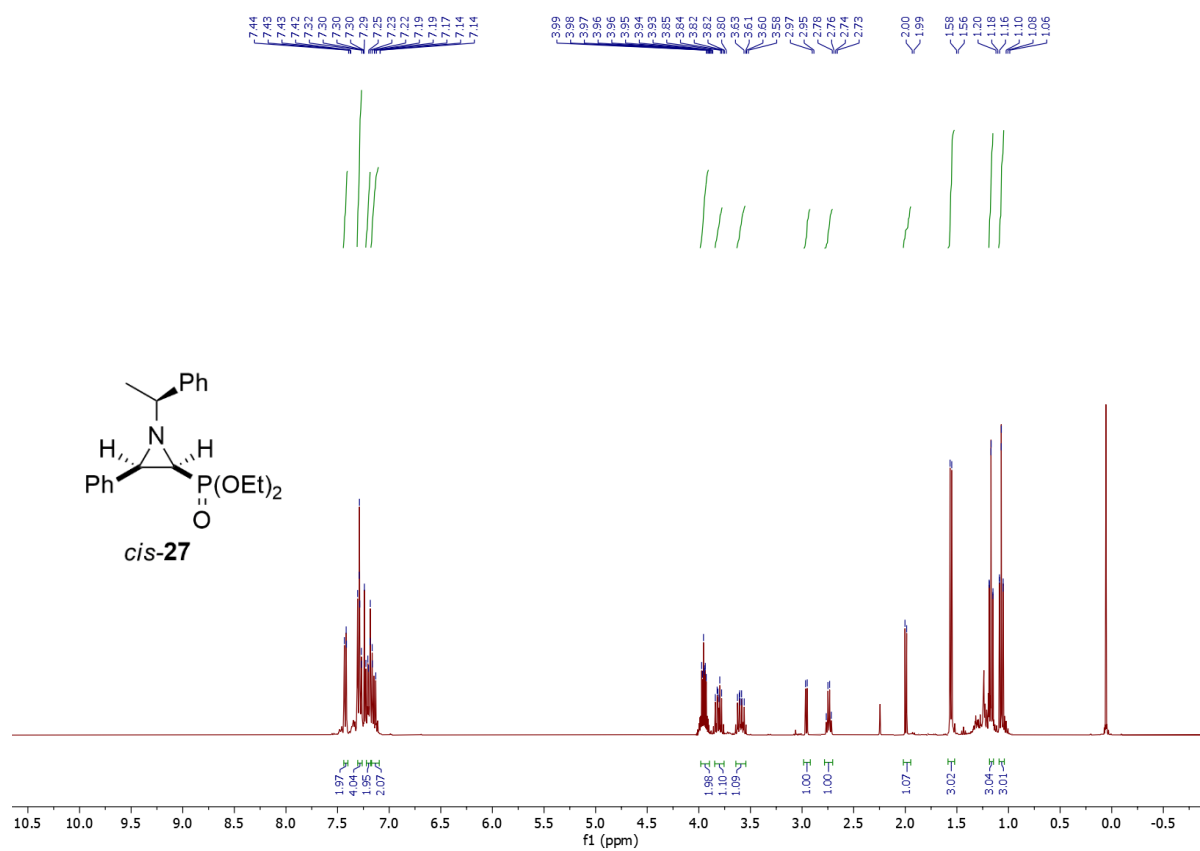

<sup>1</sup>H{<sup>31</sup>P} NMR of *cis*-27

**$^1\text{H}$  NMR of *cis*-27**

Chemical structure of *cis*-27 is shown above the NMR spectrum. The structure is a bicyclic phosphazene derivative. The nitrogen atom is bonded to a phenyl group (Ph) and a chiral center (C). The phosphorus atom is bonded to two ethoxy groups (OEt) and a chiral center (C). The protons  $\text{H}_a$  and  $\text{H}_b$  are labeled on the chiral centers.

$^1\text{H}$  NMR spectrum of *cis*-27 in  $\text{CDCl}_3$ . The spectrum shows several multiplets. A blue circle labeled  $\text{H}_b$  points to a multiplet at approximately 2.95 ppm. A red circle labeled  $\text{H}_a$  points to a multiplet at approximately 1.95 ppm. The x-axis is labeled  $f1$  (ppm) and ranges from 3.10 to 1.80.

**Chemical structure of *cis*-27:**

CC(C1=CC=CC=C1)N2C(=C(C=C2)C(=O)OP(=O)(OCC)OCC)C1=CC=CC=C1

***cis*-27**

**<sup>13</sup>C NMR spectrum (CDCl<sub>3</sub>):**

The spectrum shows the following chemical shifts (ppm):

- 143.56
- 138.95
- 138.54
- 138.54
- 128.05
- 127.69
- 127.51
- 127.18
- 127.09
- 71.88
- 71.82
- 62.13
- 61.77
- 61.84
- 61.78
- 46.30
- 46.24
- 39.86
- 29.12
- 16.42
- 16.39
- 16.35
- 16.33

The spectrum displays a complex pattern of peaks, with a prominent cluster of signals between 127 and 144 ppm, likely corresponding to the aromatic and carbonyl regions. A sharp peak is observed at approximately 71 ppm, and another significant signal is present around 62 ppm. The aliphatic region (below 50 ppm) shows several distinct peaks, including a triplet-like signal around 46 ppm and a smaller signal around 39 ppm. The CDCl<sub>3</sub> solvent triplet is visible at 77 ppm.

## 57

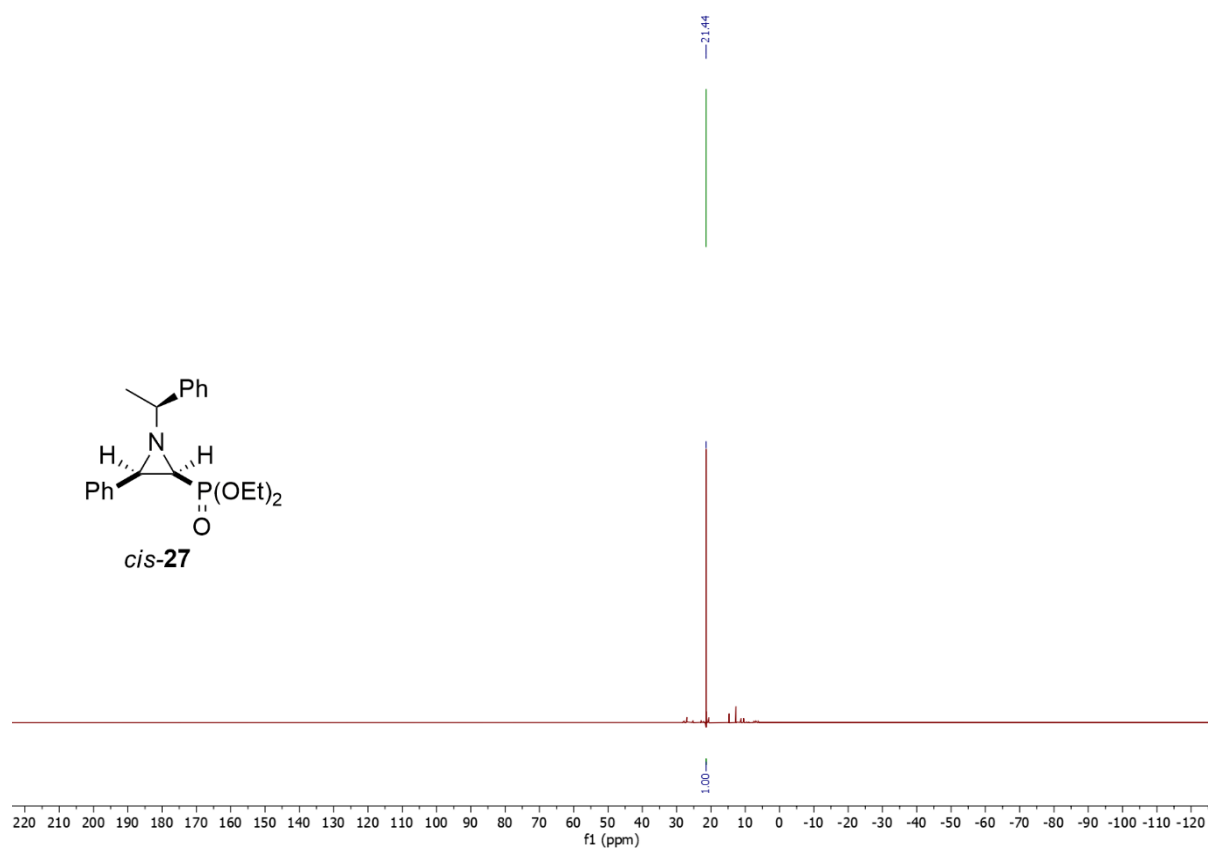

$^{31}\text{P}\{^1\text{H}\}$  NMR of *cis*-27

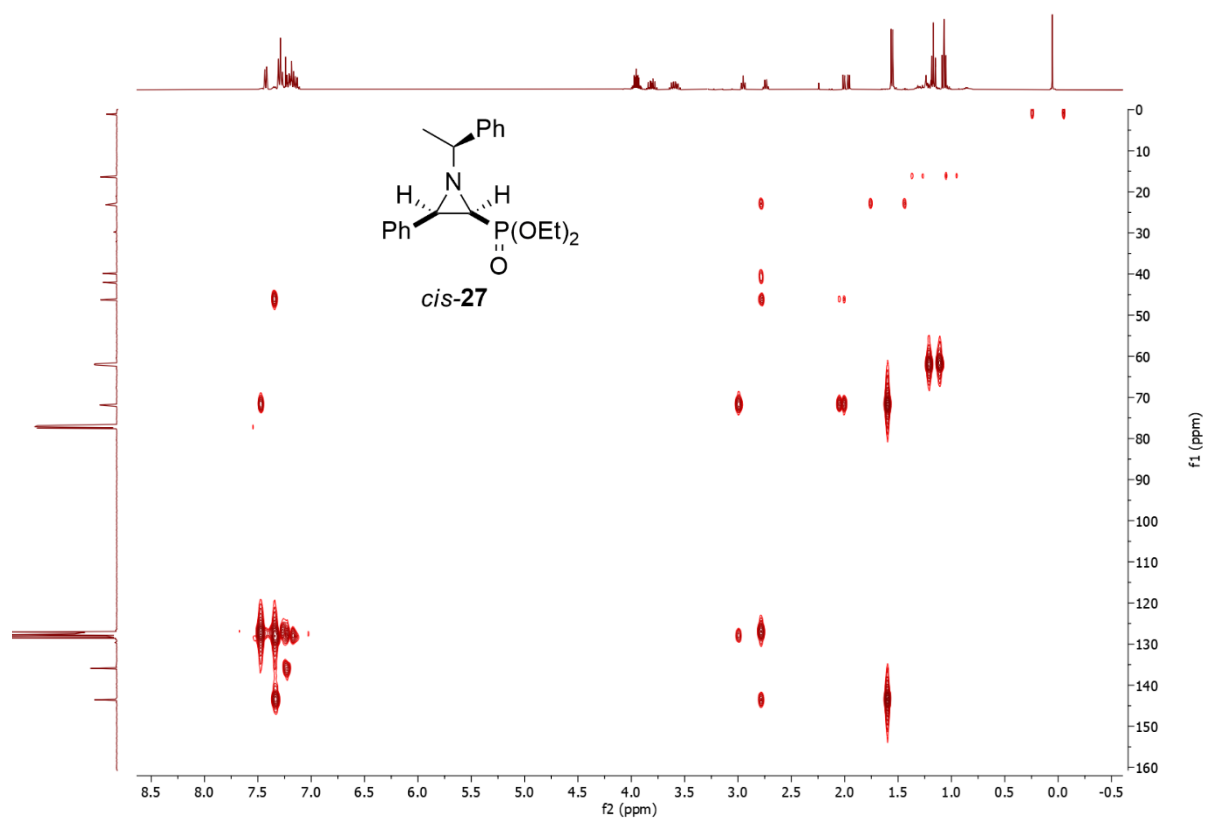

$^1\text{H}$ - $^{13}\text{C}$  HMBC NMR of *cis*-27

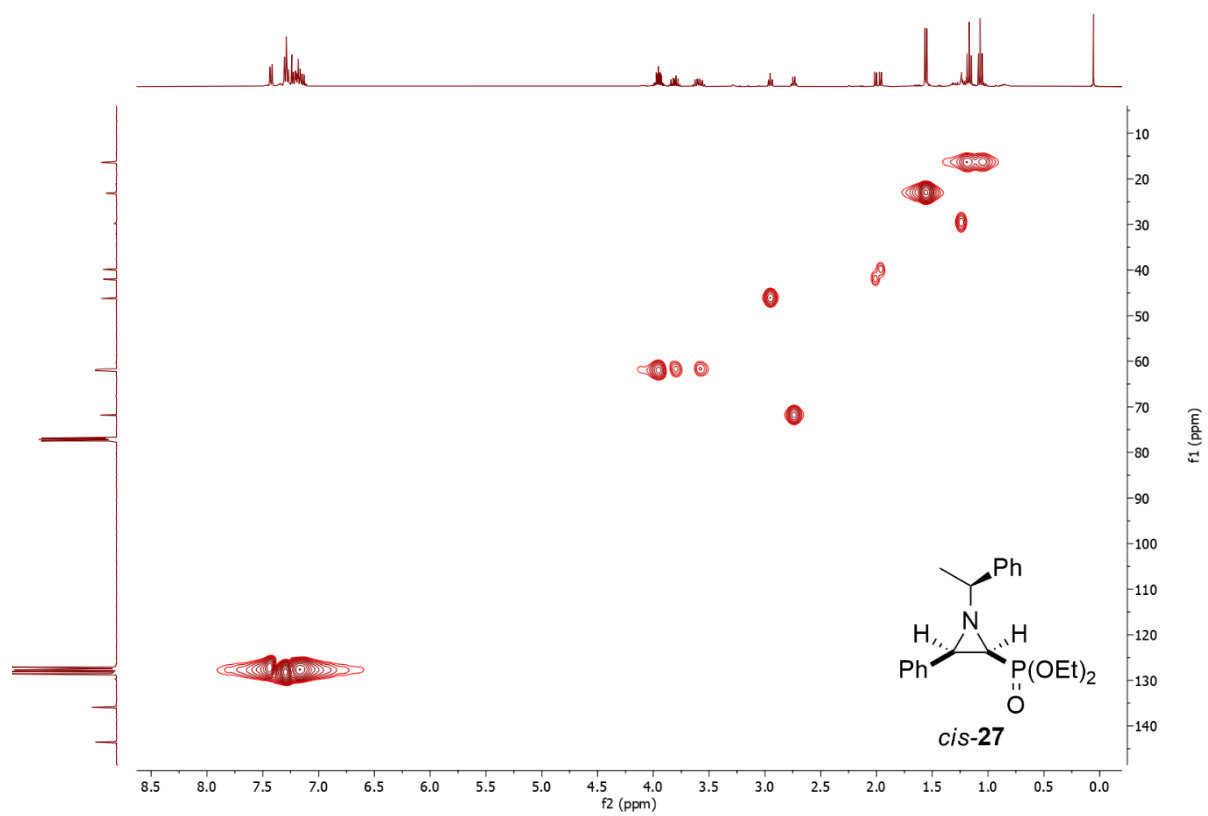

$^1\text{H}$ - $^{13}\text{C}$  HSQC NMR of *cis*-27

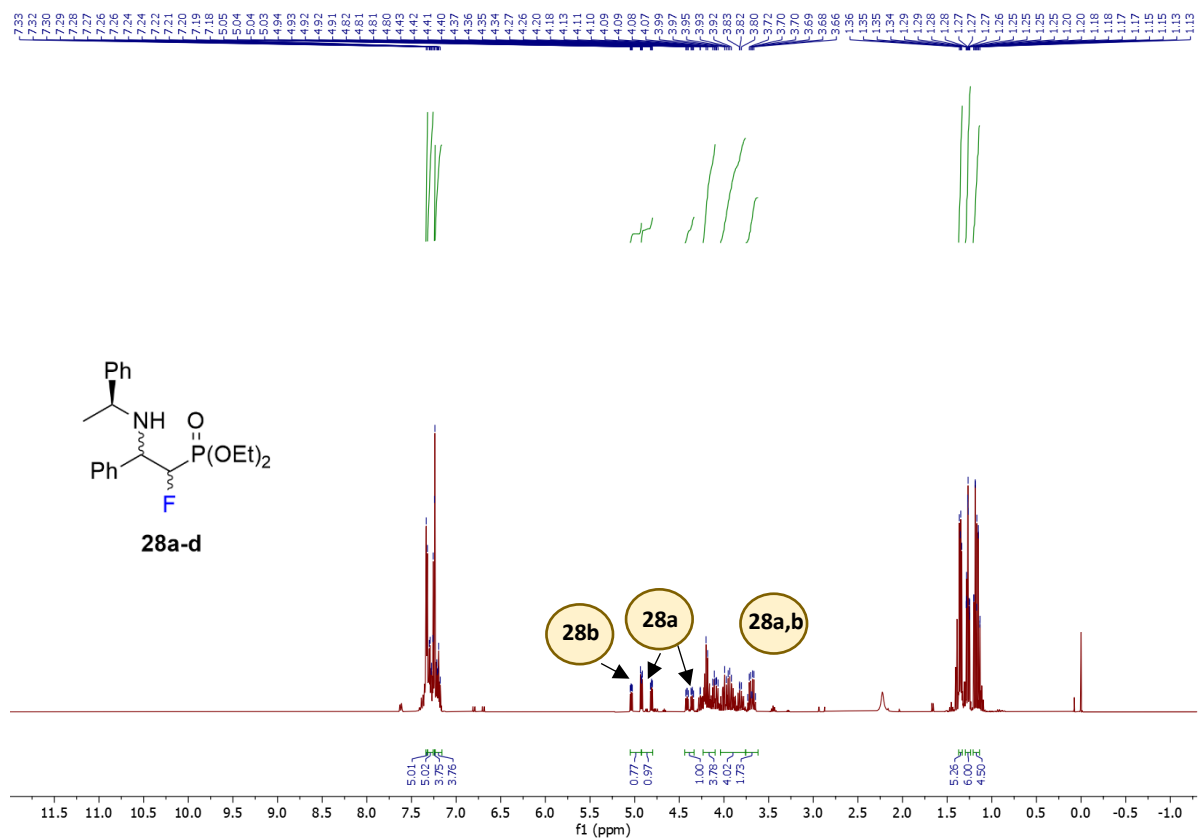

<sup>1</sup>H NMR of **28a-d** *dr* 1:0.75:0.09:0.05

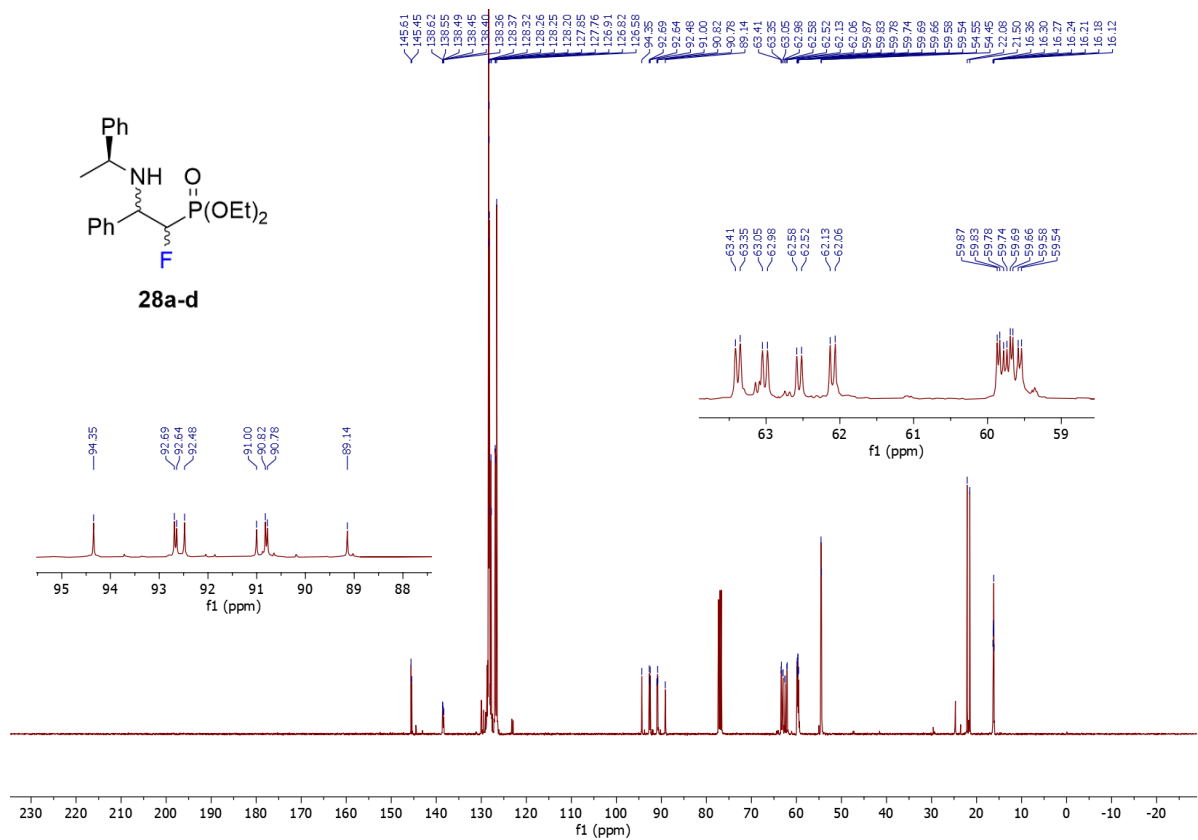

<sup>13</sup>C NMR of **28a-d** *dr* 1:0.75:0.09:0.05



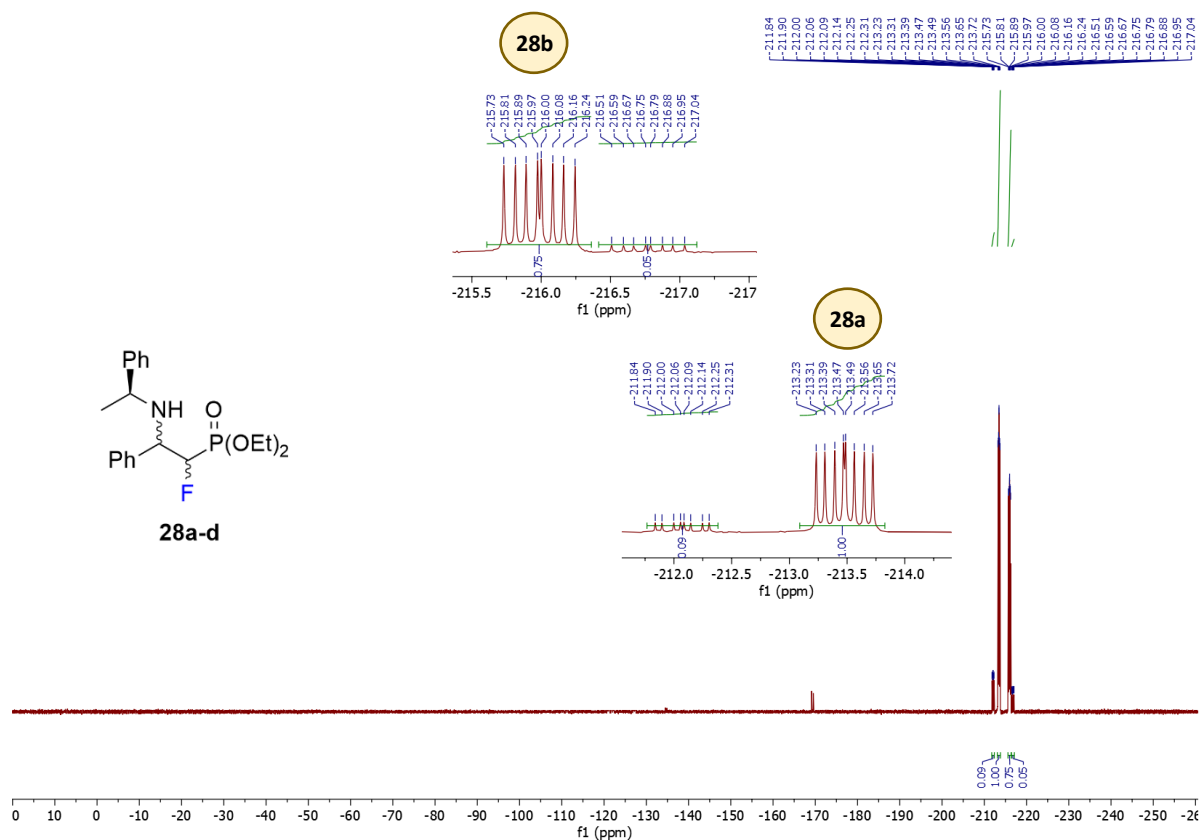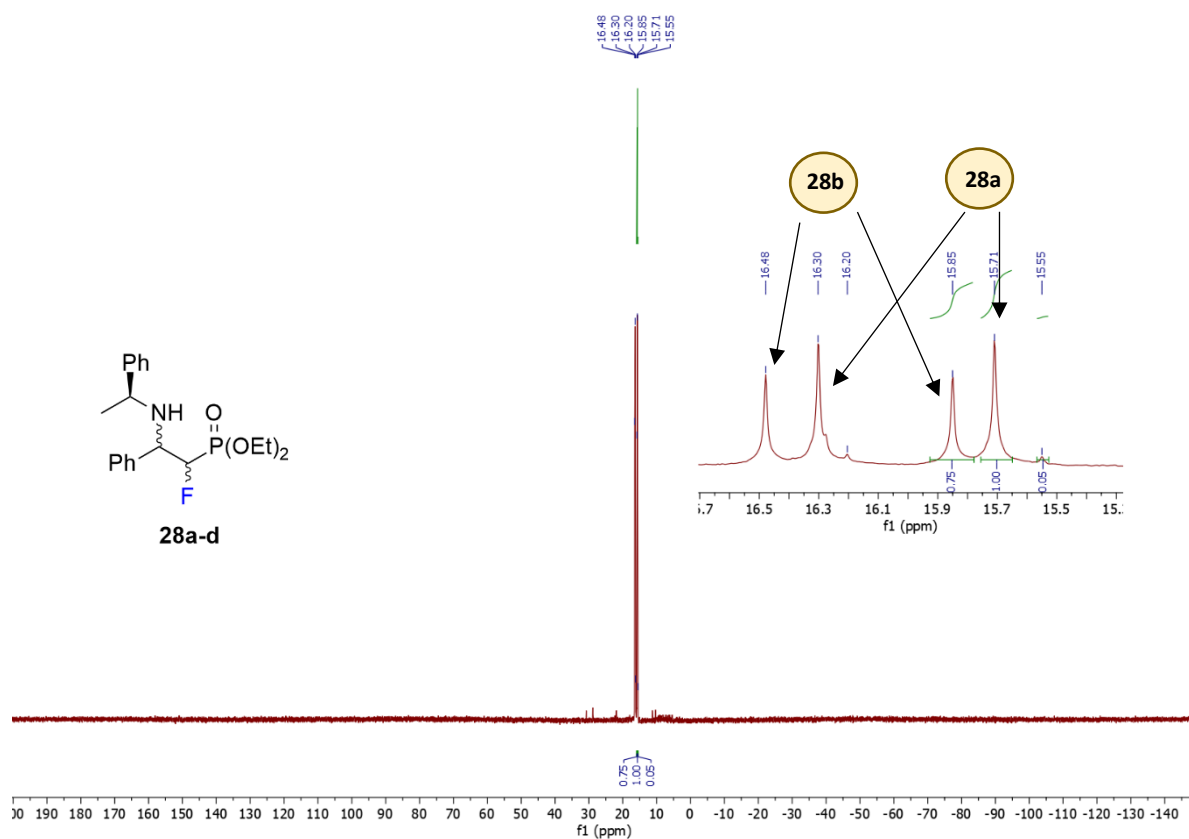

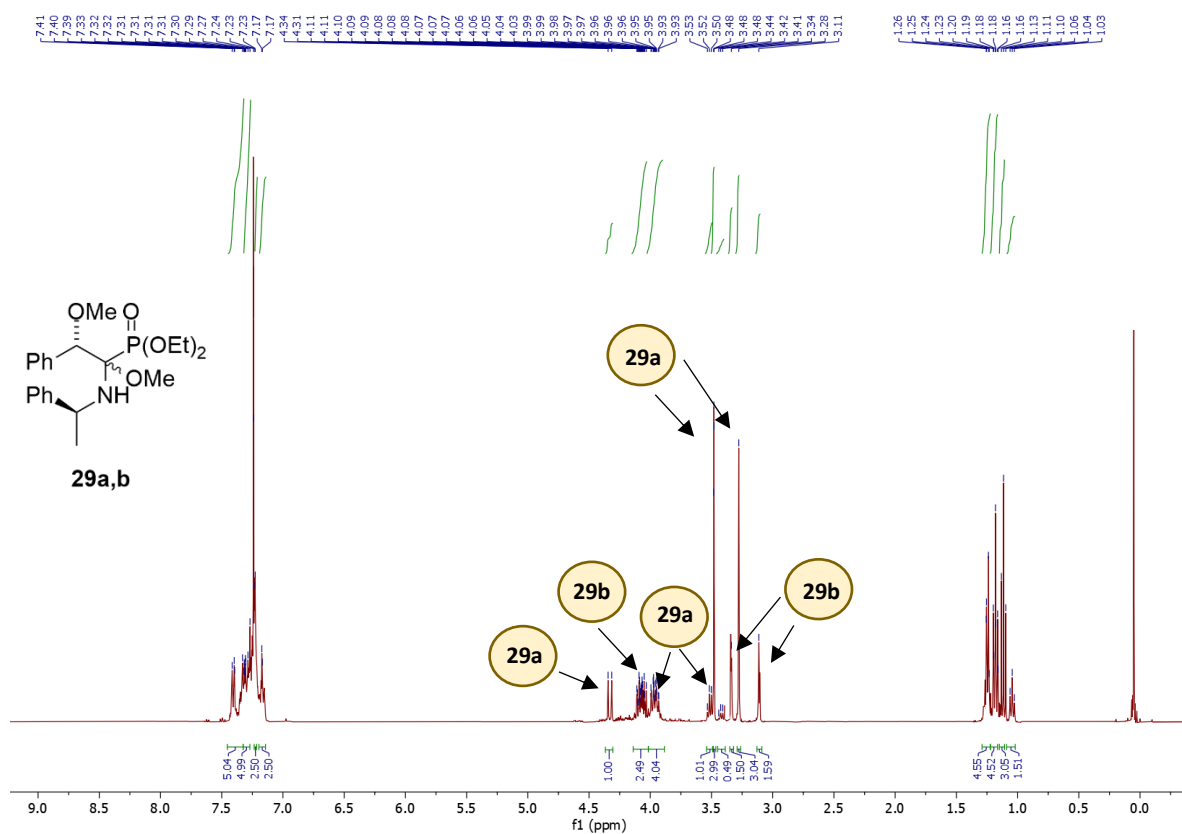

<sup>1</sup>H NMR of **29a,b** *dr* 1:0.5

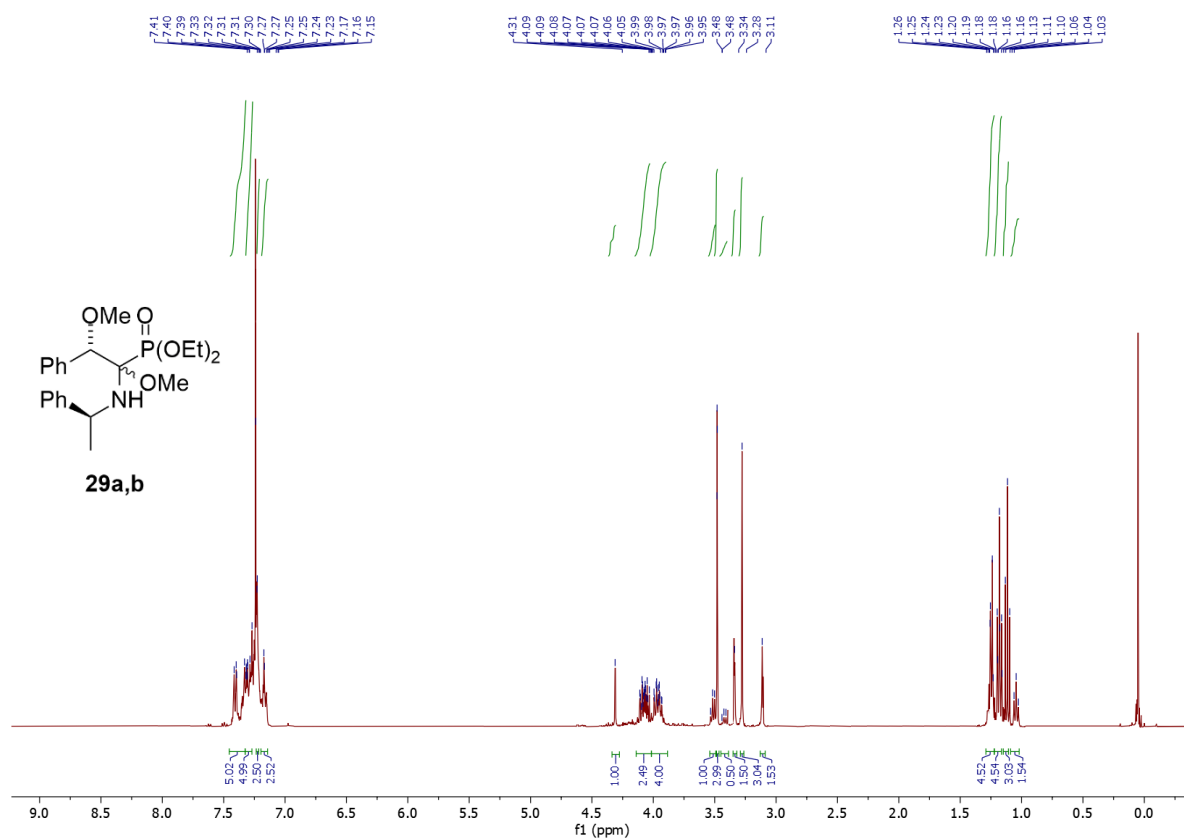

<sup>1</sup>H {<sup>31</sup>P} NMR of **29a,b** *dr* 1:0.5

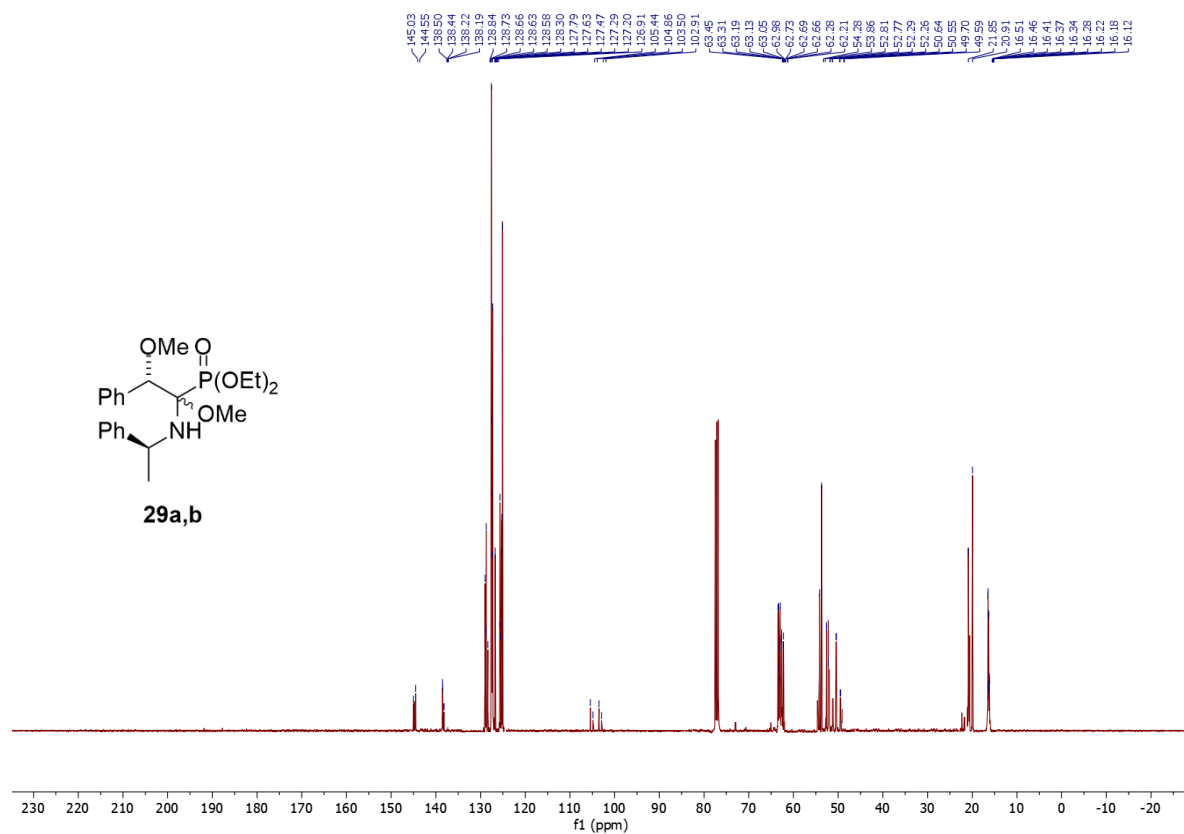

$^{13}\text{C}$  NMR of **29a,b** *dr* 1:0.5

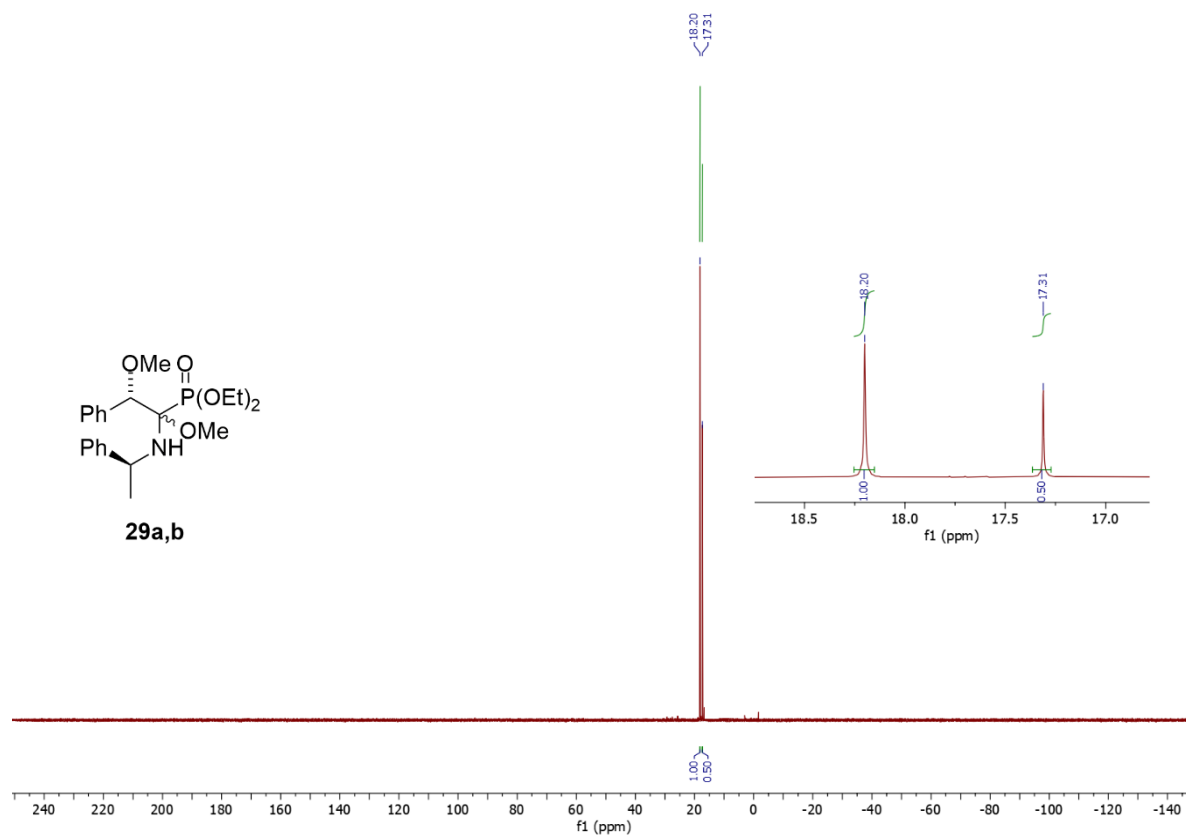

$^{31}\text{P}\{^1\text{H}\}$  NMR of **29a,b** *dr* 1:0.5

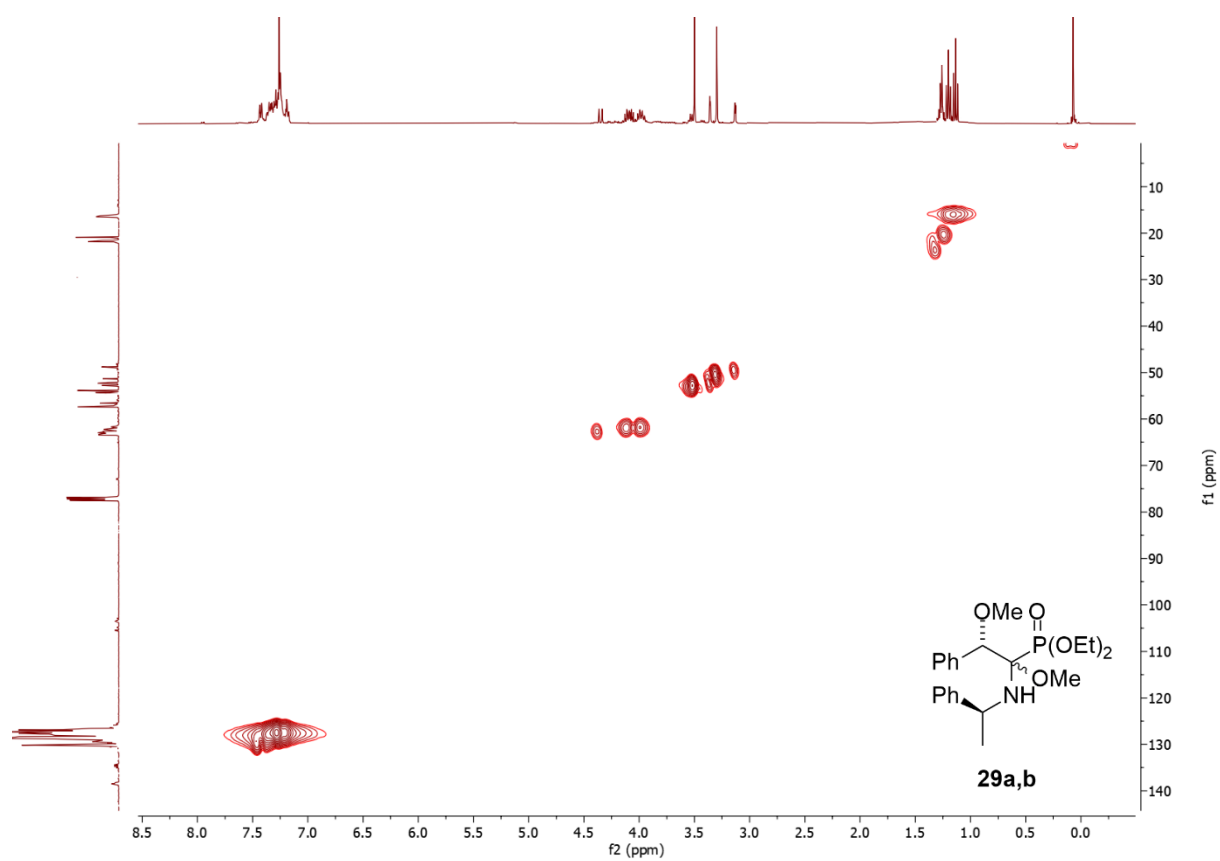

$^1\text{H}$ - $^{13}\text{C}$  HSQC NMR of **29a,b** *dr* 1:0.5

|        | Comp.      | $^{19}\text{F}$ NMR*         | $^{31}\text{P}$ NMR* | $\text{C}=\text{N}/\text{CH}(\text{Ph})\text{CF}$<br>( $^{13}\text{C}$ NMR)* | $\text{CFP}$ ( $^{13}\text{C}$ NMR)* | $\text{CHPhCF}$ ( $^1\text{H}$ NMR)* |
|--------|------------|------------------------------|----------------------|------------------------------------------------------------------------------|--------------------------------------|--------------------------------------|
| Imines | <b>10a</b> | -129.08 (d, $J$ 82.2)        | 7.37 (d, $J$ 82.1)   | 164.44 (dd, $J$ 27.0, 6.0)                                                   | 100.05 (dd, $J$ 269.8, 187.5)        | -                                    |
|        | <b>10b</b> | -128.65 (d, $J$ 82.3)        | 7.93 (d, $J$ 82.3)   | 164.64 (dd, $J$ 28.3, 5.9)                                                   | 99.78 (dd, $J$ 269.3, 187.2)         | -                                    |
|        | <b>11a</b> | -128.52 (d, $J$ 82.1)        | 7.38 (d, $J$ 82.1)   | 164.45 (dd, $J$ 27.1, 6.1)                                                   | 100.99 (dd, $J$ 269.7, 187.4)        | -                                    |
|        | <b>11b</b> | -128.13 (d, $J$ 82.3)        | 7.42 (d, $J$ 82.4)   | 164.63 (dd, $J$ 28.4, 5.9)                                                   | 99.14 (dd, $J$ 269.1, 187.0)         | -                                    |
|        | <b>12</b>  | -129.07 (d, $J$ 81.2)        | 7.98 (d, $J$ 81.4)   | 166.67 (dd, $J$ 27.7, 6.1)                                                   | 99.97 (dd, $J$ 269.7, 187.6)         | -                                    |
|        | <b>13</b>  | -128.49 (d, $J$ 81.7)        | 7.30 (d, $J$ 81.5)   | 164.12 (dd, $J$ 28.4, 5.9)                                                   | 100.17 (dd, $J$ 270.1, 187.2)        | -                                    |
|        | <b>14a</b> | -125.59 (d, $J$ 86.2)        | 8.02 (d, $J$ 86.0)   | 163.55 (dd, $J$ 28.1, 6.5)                                                   | 105.89 (dd, $J$ 260.7, 189.9)        | -                                    |
|        | <b>14b</b> | -125.39 (d, $J$ 87.0)        | 7.54 (d, $J$ 87.0)   | 163.75 (dd, $J$ 28.6, 6.8)                                                   | 105.77 (dd, $J$ 259.9, 193.0)        | -                                    |
|        | <b>15</b>  | -125.57 (d, $J$ 85.6)        | 8.09 (d, $J$ 86.0)   | 165.78 (dd, $J$ 27.9, 6.7)                                                   | 105.94 (dd, $J$ 260.5, 193.5)        | -                                    |
| Amines | <b>16a</b> | -125.06 (dd, $J$ 82.3, 10.2) | 9.77 (d, $J$ 82.0)   | 64.12 (dd, $J$ 22.0, 7.5)                                                    | 107.44 (dd, $J$ 270.1, 184.3)        | 4.58 (dd, $J$ 10.2, 4.7)             |
|        | <b>16b</b> | -135.38 (dd, $J$ 84.6, 22.1) | 9.25 (d, $J$ 84.7)   | 66.47 (dd, $J$ 18.2, 7.9)                                                    | 107.62 (dd, $J$ 274.2, 183.1)        | 4.37 (dd, $J$ 22.0, 3.5)             |
|        | <b>16c</b> | -128.26 (dd, $J$ 78.0, 10.2) | 9.06 (d, $J$ 77.9)   | only diagnostic signals ( $^{19}\text{F}$ , $^{31}\text{P}$ NMR)             |                                      |                                      |
|        | <b>16d</b> | -135.49 (dd, $J$ 88.4, 20.9) | <i>masked</i>        |                                                                              |                                      |                                      |
|        | <b>17a</b> | -125.04 (dd, $J$ 82.1, 10.1) | 9.25 (d, $J$ 82.0)   | 64.05 (dd, $J$ 21.9, 7.5)                                                    | 107.39 (dd, $J$ 270.1, 184.4)        | 4.58 (dd, $J$ 10.2, 4.7)             |
|        | <b>17b</b> | -135.36 (dd, $J$ 84.6, 22.0) | 8.73 (d, $J$ 84.6)   | 66.42 (dd, $J$ 18.2, 8.0)                                                    | 107.57 (dd, $J$ 274.0, 182.8)        | 4.34 (dd, $J$ 22.1, 3.2)             |
|        | <b>17c</b> | -128.25 (dd, $J$ 77.9, 10.2) | 8.56 (d, $J$ 78.0)   | only diagnostic signals ( $^{19}\text{F}$ , $^{31}\text{P}$ NMR)             |                                      |                                      |
|        | <b>17d</b> | <i>masked</i>                | 8.40 (d, $J$ 86.9)   |                                                                              |                                      |                                      |
|        | <b>18a</b> | -126.81 (dd, $J$ 79.5, 9.4)  | 9.52 (d, $J$ 79.5)   | 65.24 (dd, $J$ 21.5, 7.9)                                                    | 106.46 (dd, $J$ 270.2, 183.8)        | <i>masked</i>                        |
|        | <b>18b</b> | -135.34 (dd, $J$ 85.7, 20.6) | 8.93 (d, $J$ 85.7)   | 67.72 (dd, $J$ 18.4, 8.2)                                                    | 106.64 (dd, $J$ 272.9, 184.4)        | <i>masked</i>                        |
|        | <b>19a</b> | -126.36 (dd, $J$ 78.1, 9.7)  | 9.22 (d, $J$ 77.9)   | 63.30 (dd, $J$ 23.4, 6.9)                                                    | 105.61 (dd, $J$ 271.6, 183.6)        | <i>masked</i>                        |
|        | <b>19b</b> | -135.34 (dd, $J$ 82.1, 18.6) | 8.17 (d, $J$ 82.1)   | 66.49 (dd, $J$ 19.7, 7.6)                                                    | 105.37 (dd, $J$ 274.0, 181.3)        | <i>masked</i>                        |
|        | <b>20a</b> | -123.06 (dd, $J$ 87.4, 8.8)  | 9.61 (d, $J$ 87.4)   | 63.80 (dd, $J$ 23.3, 8.1)                                                    | 110.45 (dd, $J$ 260.4, 191.5)        | 4.71 (dd, $J$ 8.9, 4.6)              |
|        | <b>20b</b> | -134.74 (dd, $J$ 89.0, 21.5) | 9.02 (d, $J$ 89.2)   | 65.83 (dd, $J$ 18.6, 8.7)                                                    | 111.08 (dd, $J$ 265.2, 190.1)        | 4.41 (dd, $J$ 21.3, 3.3)             |
|        | <b>20c</b> | -125.91 (dd, $J$ 83.2, 9.2)  | 8.89 (d, $J$ 83.3)   | only diagnostic signals ( $^{19}\text{F}$ , $^{31}\text{P}$ NMR)             |                                      |                                      |
|        | <b>20d</b> | -134.88 (dd, $J$ 91.3, 21.0) | 8.66 (d, $J$ 91.5)   |                                                                              |                                      |                                      |
|        | <b>21a</b> | -124.54 (dd, $J$ 84.8, 8.3)  | 9.37 (d, $J$ 84.7)   | 65.07 (dd, $J$ 22.1, 8.6)                                                    | 109.70 (dd, $J$ 260.8, 191.2)        | 4.45 (dd, $J$ 8.4, 4.4)              |

|            |                           |                                   |                           |                                                                 |                                    |                        |
|------------|---------------------------|-----------------------------------|---------------------------|-----------------------------------------------------------------|------------------------------------|------------------------|
| Aziridines | <b>21b</b>                | -134.91 (dd, <i>J</i> 90.6, 20.5) | 8.76 (d, <i>J</i> 90.8)   | 67.24 (dd, <i>J</i> 18.8, 8.9)                                  | 110.35 (dd, <i>J</i> 264.0, 191.1) | <i>masked</i>          |
|            | <i>cis</i> - <b>24a</b>   | -182.45 (dd, <i>J</i> 118.5, 8.7) | 9.64 (d, <i>J</i> 118.8)  | 48.96 (dd, <i>J</i> 19.1, 1.6)                                  | 87.05 (dd, <i>J</i> 274.2, 272.1)  | 3.18 (d, <i>J</i> 8.7) |
|            | <i>trans</i> - <b>24b</b> | -168.76 (dt, <i>J</i> 113.8, 4.8) | 10.83 (d, <i>J</i> 114.0) | 47.46 (dd, <i>J</i> 12.7, 5.8)                                  | 84.27 (dd, <i>J</i> 258.7, 233.2)  | 3.26 (t, <i>J</i> 4.2) |
|            | <i>cis</i> - <b>24c</b>   | -178.36 (dd, <i>J</i> 114.2, 8.5) | 8.94 (d, <i>J</i> 114.1)  | only diagnostic signals ( <sup>19</sup> F, <sup>31</sup> P NMR) |                                    |                        |
|            | <i>trans</i> - <b>24d</b> | -169.11 (dt, <i>J</i> 110.8, 4.7) | 10.22 (d, <i>J</i> 110.6) |                                                                 |                                    |                        |
|            | <i>cis</i> - <b>25a</b>   | -180.27 (dd, <i>J</i> 116.7, 8.4) | 9.97 (d, <i>J</i> 116.9)  | 49.08 (dd, <i>J</i> 19.2, 1.3)                                  | 86.67 (dd, <i>J</i> 274.0, 272.5)  | 3.26 (d, <i>J</i> 8.5) |
|            | <i>trans</i> - <b>25b</b> | -170.98 (dq, <i>J</i> 111.7, 4.3) | 10.95 (d, <i>J</i> 111.6) | 48.43 (dd, <i>J</i> 12.9, 6.0)                                  | 83.95 (dd, <i>J</i> 259.6, 231.6)  | 3.45 (t, <i>J</i> 4.1) |
|            | <i>cis</i> - <b>26a</b>   | -171.22 (dd, <i>J</i> 117.5, 7.9) | 8.63 (d, <i>J</i> 117.4)  | only diagnostic signals ( <sup>19</sup> F, <sup>31</sup> P NMR) |                                    |                        |
|            | <i>trans</i> - <b>26b</b> | -169.58 (dd, <i>J</i> 121.4, 4.3) | 8.82 (d, <i>J</i> 121.5)  | 46.12 (dd, <i>J</i> 13.1, 5.4)                                  | 83.91 (dd, <i>J</i> 260.8, 238.3)  | 3.84 (t, <i>J</i> 4.1) |
|            |                           | *δ [ppm], <i>J</i> [Hz]           |                           |                                                                 |                                    |                        |

**The geometries of reported structures optimized at the PCM/ $\omega$ b97x-d/def-TZVP(D) level of theory.**

**TS<sub>C1</sub>** (solvent=n,n-DiMethylFormamide, Figures 8 and 9 in the manuscript):

|    |              |              |              |
|----|--------------|--------------|--------------|
| 6  | -2.019045000 | 0.410186000  | -0.108645000 |
| 6  | -3.200516000 | 1.121259000  | -0.305764000 |
| 6  | -4.327410000 | 0.838393000  | 0.447347000  |
| 6  | -4.286102000 | -0.166266000 | 1.404224000  |
| 6  | -3.114435000 | -0.880449000 | 1.598958000  |
| 6  | -1.983956000 | -0.594170000 | 0.847054000  |
| 1  | -1.084814000 | -1.169784000 | 1.004211000  |
| 6  | -0.852160000 | 0.821076000  | -0.965256000 |
| 1  | -3.239899000 | 1.903080000  | -1.055474000 |
| 1  | -5.238572000 | 1.398903000  | 0.282929000  |
| 1  | -5.165603000 | -0.392683000 | 1.993312000  |
| 1  | -3.074354000 | -1.667540000 | 2.340952000  |
| 7  | -0.265251000 | 2.112853000  | -0.650123000 |
| 1  | -1.115077000 | 0.774096000  | -2.021452000 |
| 6  | 0.543996000  | 0.346973000  | -0.805123000 |
| 15 | 1.477998000  | 0.430251000  | 0.807352000  |
| 9  | 1.286973000  | 0.507710000  | -1.878011000 |
| 8  | 0.595307000  | 0.906832000  | 1.875833000  |
| 8  | 2.646351000  | 1.348511000  | 0.323330000  |
| 8  | 2.197990000  | -0.925762000 | 1.089748000  |
| 6  | 3.807972000  | 1.596139000  | 1.135537000  |
| 6  | 1.687702000  | -1.926997000 | 1.986421000  |
| 1  | 4.420149000  | 2.299227000  | 0.579379000  |
| 1  | 4.354157000  | 0.668119000  | 1.295456000  |
| 1  | 3.514019000  | 2.033062000  | 2.089109000  |
| 1  | 1.094585000  | -1.463387000 | 2.772725000  |
| 1  | 2.552902000  | -2.424967000 | 2.415008000  |
| 1  | 1.087115000  | -2.632005000 | 1.415000000  |
| 6  | -0.089769000 | 3.137713000  | -1.657512000 |
| 1  | -1.052592000 | 3.538931000  | -1.982429000 |
| 1  | 0.425589000  | 2.720755000  | -2.521883000 |
| 1  | 0.518121000  | 3.937982000  | -1.242548000 |
| 35 | 0.286030000  | -2.188826000 | -1.317112000 |
| 1  | -0.417580000 | 2.412209000  | 0.302577000  |

**TS<sub>C2</sub>** (solvent=n,n-DiMethylFormamide, Figures 8 and 9 in the manuscript):

|   |             |              |              |
|---|-------------|--------------|--------------|
| 6 | 2.108536000 | -0.292335000 | -0.257594000 |
| 6 | 2.017484000 | 0.091071000  | 1.073063000  |
| 6 | 3.166645000 | 0.200004000  | 1.842844000  |
| 6 | 4.410204000 | -0.076623000 | 1.295591000  |
| 6 | 4.505666000 | -0.461943000 | -0.033849000 |
| 6 | 3.360061000 | -0.564570000 | -0.805405000 |
| 1 | 3.438826000 | -0.859909000 | -1.845402000 |

|    |              |              |              |
|----|--------------|--------------|--------------|
| 6  | 0.941491000  | -0.485283000 | -1.182803000 |
| 1  | 1.054301000  | 0.300494000  | 1.511844000  |
| 1  | 3.085729000  | 0.503883000  | 2.878692000  |
| 1  | 5.303001000  | 0.010392000  | 1.901658000  |
| 1  | 5.471380000  | -0.676196000 | -0.473025000 |
| 7  | 0.391727000  | -1.834610000 | -1.287573000 |
| 1  | 1.203184000  | -0.110693000 | -2.170626000 |
| 6  | -0.480077000 | -0.142698000 | -0.948241000 |
| 15 | -1.626322000 | -0.543083000 | 0.464604000  |
| 9  | -1.148816000 | 0.047608000  | -2.069823000 |
| 8  | -0.938127000 | -0.664934000 | 1.749623000  |
| 8  | -2.275754000 | -1.838300000 | -0.137244000 |
| 8  | -2.798101000 | 0.484396000  | 0.384929000  |
| 6  | -3.409275000 | -2.456775000 | 0.495201000  |
| 6  | -3.035272000 | 1.531881000  | 1.340391000  |
| 1  | -3.636561000 | -3.342057000 | -0.090782000 |
| 1  | -4.259724000 | -1.776247000 | 0.488294000  |
| 1  | -3.160783000 | -2.742217000 | 1.516881000  |
| 1  | -2.286067000 | 1.509604000  | 2.128886000  |
| 1  | -4.025972000 | 1.366104000  | 1.757637000  |
| 1  | -2.990892000 | 2.480148000  | 0.813200000  |
| 6  | 0.708322000  | -2.866928000 | -0.317292000 |
| 1  | 1.738697000  | -3.208773000 | -0.437533000 |
| 1  | 0.022085000  | -3.697267000 | -0.462894000 |
| 1  | 0.583316000  | -2.482761000 | 0.693494000  |
| 35 | -0.212821000 | 2.420999000  | -0.465625000 |
| 1  | 0.233445000  | -2.153522000 | -2.230995000 |

**TS<sub>T1</sub>** (solvent=n,n-DiMethylFormamide, Figures 8 and 9 in the manuscript):

|    |              |              |              |
|----|--------------|--------------|--------------|
| 6  | -2.244579000 | -0.591238000 | 0.190985000  |
| 6  | -2.810732000 | -0.991223000 | -1.015207000 |
| 6  | -4.154392000 | -0.760388000 | -1.266122000 |
| 6  | -4.943452000 | -0.130540000 | -0.314973000 |
| 6  | -4.384849000 | 0.265803000  | 0.891247000  |
| 6  | -3.041739000 | 0.035263000  | 1.141943000  |
| 1  | -2.606687000 | 0.349487000  | 2.082486000  |
| 6  | -0.800363000 | -0.833023000 | 0.513005000  |
| 1  | -2.216643000 | -1.481477000 | -1.776368000 |
| 1  | -4.584051000 | -1.073751000 | -2.208664000 |
| 1  | -5.992481000 | 0.048337000  | -0.512906000 |
| 1  | -4.995028000 | 0.754128000  | 1.639949000  |
| 7  | -0.211836000 | -2.113374000 | 0.157757000  |
| 1  | -0.575333000 | -0.598705000 | 1.549479000  |
| 6  | 0.288274000  | -0.330188000 | -0.352227000 |
| 15 | 2.060135000  | -0.267023000 | 0.191493000  |
| 9  | 0.082266000  | -0.310125000 | -1.644298000 |
| 8  | 2.137090000  | -0.229879000 | 1.652925000  |
| 8  | 2.787977000  | 0.861777000  | -0.601209000 |
| 8  | 2.569423000  | -1.560485000 | -0.538958000 |
| 6  | 3.281751000  | 2.084336000  | -0.028585000 |



|    |              |              |              |
|----|--------------|--------------|--------------|
| 6  | 3.970675000  | -1.871070000 | -0.613970000 |
| 1  | 3.081981000  | 2.115946000  | 1.040240000  |
| 1  | 2.781722000  | 2.911204000  | -0.523780000 |
| 1  | 4.353319000  | 2.112505000  | -0.213303000 |
| 1  | 4.388964000  | -1.969337000 | 0.387336000  |
| 1  | 4.497265000  | -1.096157000 | -1.169337000 |
| 1  | 4.043075000  | -2.819103000 | -1.138249000 |
| 6  | 0.290303000  | -3.014244000 | 1.182346000  |
| 1  | -0.538487000 | -3.454218000 | 1.741608000  |
| 1  | 0.932507000  | -2.463013000 | 1.866661000  |
| 1  | 0.873625000  | -3.798712000 | 0.706674000  |
| 35 | -0.160810000 | 2.253232000  | 0.054811000  |
| 1  | -0.636280000 | -2.562406000 | -0.640915000 |

**TS<sub>r2</sub>** (solvent=n,n-DiMethylFormamide, Figures 8 and 9 in the manuscript):

|    |              |              |              |
|----|--------------|--------------|--------------|
| 6  | -2.224187000 | -0.401913000 | 0.316358000  |
| 6  | -2.750249000 | -0.514107000 | -0.968078000 |
| 6  | -4.101004000 | -0.297117000 | -1.189691000 |
| 6  | -4.942161000 | 0.028318000  | -0.135772000 |
| 6  | -4.426117000 | 0.138158000  | 1.146289000  |
| 6  | -3.074872000 | -0.075030000 | 1.368119000  |
| 1  | -2.675487000 | 0.019435000  | 2.370537000  |
| 6  | -0.784110000 | -0.644999000 | 0.657759000  |
| 1  | -2.117545000 | -0.763397000 | -1.806960000 |
| 1  | -4.496451000 | -0.382834000 | -2.193486000 |
| 1  | -5.996304000 | 0.197212000  | -0.314397000 |
| 1  | -5.072890000 | 0.394206000  | 1.975383000  |
| 7  | -0.249315000 | -2.002153000 | 0.561167000  |
| 1  | -0.556061000 | -0.244049000 | 1.640428000  |
| 6  | 0.341732000  | -0.344963000 | -0.247125000 |
| 15 | 2.090033000  | -0.374705000 | 0.368165000  |
| 9  | 0.189391000  | -0.533809000 | -1.532179000 |
| 8  | 2.081048000  | -0.316027000 | 1.831694000  |
| 8  | 2.935436000  | 0.696642000  | -0.385821000 |
| 8  | 2.552060000  | -1.704127000 | -0.325684000 |
| 6  | 3.445020000  | 1.905520000  | 0.201733000  |
| 6  | 3.940011000  | -2.055022000 | -0.455475000 |
| 1  | 4.527043000  | 1.881057000  | 0.093902000  |
| 1  | 3.172934000  | 1.966039000  | 1.253380000  |
| 1  | 3.020433000  | 2.744703000  | -0.340944000 |
| 1  | 4.411639000  | -2.102921000 | 0.525522000  |
| 1  | 4.451379000  | -1.329150000 | -1.085372000 |
| 1  | 3.961050000  | -3.035168000 | -0.922120000 |
| 6  | -0.839072000 | -3.030827000 | -0.269424000 |
| 1  | -1.871636000 | -3.232329000 | 0.022057000  |
| 1  | -0.243785000 | -3.933517000 | -0.160587000 |
| 1  | -0.824070000 | -2.735800000 | -1.318406000 |
| 35 | 0.020424000  | 2.275825000  | -0.237192000 |
| 1  | 0.226810000  | -2.317445000 | 1.392081000  |

**16a'** (solvent=n,n-DiMethylFormamide, Figures 8 and 9 in the manuscript, **B1** from the Figure 5):

|    |              |              |              |
|----|--------------|--------------|--------------|
| 6  | 0.888300000  | -2.783003000 | 0.955936000  |
| 6  | 1.528401000  | -3.170313000 | -0.217206000 |
| 6  | 1.967924000  | -4.473964000 | -0.388886000 |
| 6  | 1.780695000  | -5.407789000 | 0.620107000  |
| 6  | 1.156318000  | -5.027614000 | 1.798980000  |
| 6  | 0.713758000  | -3.723485000 | 1.964691000  |
| 1  | 0.234858000  | -3.445279000 | 2.895219000  |
| 6  | 0.411161000  | -1.347571000 | 1.107386000  |
| 1  | 1.686817000  | -2.442738000 | -1.004362000 |
| 1  | 2.463434000  | -4.758388000 | -1.308524000 |
| 1  | 2.127255000  | -6.425361000 | 0.491620000  |
| 1  | 1.014234000  | -5.747365000 | 2.595141000  |
| 7  | 0.384260000  | -0.785800000 | 2.434905000  |
| 1  | 1.082649000  | -0.717707000 | 0.514705000  |
| 6  | -0.962120000 | -1.082773000 | 0.473534000  |
| 15 | -1.355603000 | 0.740086000  | 0.523422000  |
| 9  | -0.934498000 | -1.456478000 | -0.841805000 |
| 8  | -0.188225000 | 1.542792000  | 0.135224000  |
| 8  | -2.022228000 | 1.121698000  | 1.892266000  |
| 8  | -2.580126000 | 0.744990000  | -0.462602000 |
| 6  | -1.330172000 | 1.767226000  | 2.968619000  |
| 6  | -3.259693000 | 1.964535000  | -0.790381000 |
| 1  | -1.959218000 | 2.590252000  | 3.300536000  |
| 1  | -0.364344000 | 2.142313000  | 2.636663000  |
| 1  | -1.189177000 | 1.048754000  | 3.771955000  |
| 1  | -2.562299000 | 2.682788000  | -1.220939000 |
| 1  | -3.729151000 | 2.384049000  | 0.099248000  |
| 1  | -4.020068000 | 1.705874000  | -1.521443000 |
| 6  | 1.691739000  | -0.546680000 | 3.019739000  |
| 1  | 2.228581000  | 0.184633000  | 2.412793000  |
| 1  | 2.310475000  | -1.449288000 | 3.098181000  |
| 1  | 1.562886000  | -0.128276000 | 4.017264000  |
| 35 | -2.387753000 | -2.117235000 | 1.330923000  |
| 1  | -0.196598000 | -1.333610000 | 3.055214000  |

**16a' A1** (solvent=Chloroform, Figure 5 in the manuscript):

|   |              |              |              |
|---|--------------|--------------|--------------|
| 6 | -1.682257000 | 0.614623000  | -0.119361000 |
| 6 | -2.278591000 | 0.519227000  | 1.134577000  |
| 6 | -3.555863000 | -0.000570000 | 1.263666000  |
| 6 | -4.257273000 | -0.421072000 | 0.140086000  |
| 6 | -3.670302000 | -0.324757000 | -1.111113000 |
| 6 | -2.386753000 | 0.189088000  | -1.237583000 |
| 1 | -1.928641000 | 0.261631000  | -2.216508000 |
| 6 | -0.306527000 | 1.239166000  | -0.288157000 |
| 1 | -1.743298000 | 0.870716000  | 2.006153000  |

|    |              |              |              |
|----|--------------|--------------|--------------|
| 1  | -4.010848000 | -0.070208000 | 2.243684000  |
| 1  | -5.259009000 | -0.818833000 | 0.242547000  |
| 1  | -4.210149000 | -0.646100000 | -1.992719000 |
| 7  | -0.269952000 | 2.541604000  | 0.352977000  |
| 1  | -0.109924000 | 1.299103000  | -1.368414000 |
| 6  | 0.820156000  | 0.346073000  | 0.263925000  |
| 15 | 0.848360000  | -1.379933000 | -0.443588000 |
| 9  | 0.766461000  | 0.261115000  | 1.626240000  |
| 8  | 0.639846000  | -1.381737000 | -1.890301000 |
| 8  | -0.205253000 | -2.126138000 | 0.448949000  |
| 8  | 2.227328000  | -1.997923000 | -0.023471000 |
| 6  | -1.351842000 | -2.825032000 | -0.052948000 |
| 6  | 2.629187000  | -2.300126000 | 1.317916000  |
| 1  | -2.226475000 | -2.429699000 | 0.457942000  |
| 1  | -1.226067000 | -3.882620000 | 0.170675000  |
| 1  | -1.450788000 | -2.677636000 | -1.126418000 |
| 1  | 1.808082000  | -2.753231000 | 1.871608000  |
| 1  | 2.962737000  | -1.391119000 | 1.817459000  |
| 1  | 3.455500000  | -3.001215000 | 1.239810000  |
| 6  | -1.146767000 | 3.512685000  | -0.283036000 |
| 1  | -2.189938000 | 3.236289000  | -0.124860000 |
| 1  | -0.980063000 | 3.602370000  | -1.366120000 |
| 1  | -0.983723000 | 4.487735000  | 0.174349000  |
| 35 | 2.559288000  | 1.169344000  | -0.186588000 |
| 1  | 0.678319000  | 2.893242000  | 0.341583000  |

**16a' B1** (solvent=Chloroform, Figure 5 in the manuscript):

|    |              |              |              |
|----|--------------|--------------|--------------|
| 6  | 0.882131000  | -2.783041000 | 0.960101000  |
| 6  | 1.520597000  | -3.160027000 | -0.216950000 |
| 6  | 1.967839000  | -4.459490000 | -0.397111000 |
| 6  | 1.789708000  | -5.400093000 | 0.606752000  |
| 6  | 1.165664000  | -5.030960000 | 1.788854000  |
| 6  | 0.715623000  | -3.730832000 | 1.962891000  |
| 1  | 0.235237000  | -3.461405000 | 2.895236000  |
| 6  | 0.398052000  | -1.351197000 | 1.120849000  |
| 1  | 1.669393000  | -2.427341000 | -1.001199000 |
| 1  | 2.461302000  | -4.735764000 | -1.320317000 |
| 1  | 2.141811000  | -6.414841000 | 0.471151000  |
| 1  | 1.028730000  | -5.756700000 | 2.580502000  |
| 7  | 0.378598000  | -0.796808000 | 2.452222000  |
| 1  | 1.061645000  | -0.714073000 | 0.527133000  |
| 6  | -0.980947000 | -1.091286000 | 0.496846000  |
| 15 | -1.364997000 | 0.733935000  | 0.530673000  |
| 9  | -0.965841000 | -1.479185000 | -0.812408000 |
| 8  | -0.194116000 | 1.528707000  | 0.141975000  |
| 8  | -2.029735000 | 1.129524000  | 1.899531000  |
| 8  | -2.591621000 | 0.737856000  | -0.452372000 |
| 6  | -1.325050000 | 1.776366000  | 2.964150000  |
| 6  | -3.242331000 | 1.961462000  | -0.811748000 |

|    |              |              |              |
|----|--------------|--------------|--------------|
| 1  | -1.948142000 | 2.602034000  | 3.301834000  |
| 1  | -0.362298000 | 2.148667000  | 2.619540000  |
| 1  | -1.175691000 | 1.061042000  | 3.769289000  |
| 1  | -2.525137000 | 2.660492000  | -1.241922000 |
| 1  | -3.720100000 | 2.404451000  | 0.062435000  |
| 1  | -3.995118000 | 1.704252000  | -1.551461000 |
| 6  | 1.689497000  | -0.548403000 | 3.024386000  |
| 1  | 2.208150000  | 0.198315000  | 2.420533000  |
| 1  | 2.321515000  | -1.443438000 | 3.083434000  |
| 1  | 1.568454000  | -0.143768000 | 4.028897000  |
| 35 | -2.398931000 | -2.113586000 | 1.381839000  |
| 1  | -0.191417000 | -1.355592000 | 3.072561000  |

**16a' C1** (solvent=Chloroform, Figure 5 in the manuscript):

|    |              |              |              |
|----|--------------|--------------|--------------|
| 6  | -2.126615000 | 0.362048000  | -0.088670000 |
| 6  | -2.924416000 | -0.446967000 | 0.713556000  |
| 6  | -4.244805000 | -0.696753000 | 0.376087000  |
| 6  | -4.791919000 | -0.129603000 | -0.766008000 |
| 6  | -4.011608000 | 0.696227000  | -1.560540000 |
| 6  | -2.690117000 | 0.942269000  | -1.218533000 |
| 1  | -2.088630000 | 1.594495000  | -1.840522000 |
| 6  | -0.676790000 | 0.659606000  | 0.285826000  |
| 1  | -2.513525000 | -0.889561000 | 1.613105000  |
| 1  | -4.849531000 | -1.332677000 | 1.010472000  |
| 1  | -5.824499000 | -0.321665000 | -1.028696000 |
| 1  | -4.432511000 | 1.155609000  | -2.445956000 |
| 7  | -0.437379000 | 0.918864000  | 1.690053000  |
| 1  | -0.378840000 | 1.562396000  | -0.256675000 |
| 6  | 0.319901000  | -0.425938000 | -0.193834000 |
| 15 | 0.086062000  | -2.132319000 | 0.510572000  |
| 9  | 1.582254000  | -0.054292000 | 0.190835000  |
| 8  | -0.174451000 | -2.082435000 | 1.955974000  |
| 8  | 1.369598000  | -2.932121000 | 0.083634000  |
| 8  | -1.033931000 | -2.742142000 | -0.392554000 |
| 6  | 2.574286000  | -2.944502000 | 0.864228000  |
| 6  | -1.970677000 | -3.715721000 | 0.086347000  |
| 1  | 3.032100000  | -3.918968000 | 0.715904000  |
| 1  | 2.347576000  | -2.796650000 | 1.919094000  |
| 1  | 3.240141000  | -2.160478000 | 0.509028000  |
| 1  | -2.255344000 | -3.498072000 | 1.114814000  |
| 1  | -1.529769000 | -4.709632000 | 0.021273000  |
| 1  | -2.840034000 | -3.647700000 | -0.561446000 |
| 6  | -1.145014000 | 2.076965000  | 2.201069000  |
| 1  | -0.895798000 | 2.208476000  | 3.253601000  |
| 1  | -2.237642000 | 2.011329000  | 2.109492000  |
| 1  | -0.816447000 | 2.970305000  | 1.664535000  |
| 35 | 0.358414000  | -0.505858000 | -2.149719000 |
| 1  | -0.611164000 | 0.093512000  | 2.248680000  |

**16b' D1** (solvent=Chloroform, Figure 5 in the manuscript):

|    |              |              |              |
|----|--------------|--------------|--------------|
| 6  | 1.761021000  | -0.363087000 | -0.358211000 |
| 6  | 2.307342000  | -0.715688000 | 0.871991000  |
| 6  | 3.501566000  | -0.154788000 | 1.295093000  |
| 6  | 4.174034000  | 0.752488000  | 0.486616000  |
| 6  | 3.644183000  | 1.095393000  | -0.747049000 |
| 6  | 2.443149000  | 0.540151000  | -1.164338000 |
| 1  | 2.026524000  | 0.815527000  | -2.125202000 |
| 6  | 0.476215000  | -0.993747000 | -0.862434000 |
| 1  | 1.802573000  | -1.447578000 | 1.487369000  |
| 1  | 3.915053000  | -0.435075000 | 2.255649000  |
| 1  | 5.111137000  | 1.183343000  | 0.815891000  |
| 1  | 4.164874000  | 1.794823000  | -1.388633000 |
| 7  | 0.505735000  | -2.437170000 | -0.723577000 |
| 1  | 0.371137000  | -0.692337000 | -1.917117000 |
| 6  | -0.808324000 | -0.426779000 | -0.237113000 |
| 15 | -0.965650000 | 1.424944000  | -0.349557000 |
| 9  | -1.863951000 | -0.920961000 | -0.985435000 |
| 8  | -0.577830000 | 1.893143000  | -1.683604000 |
| 8  | -0.179892000 | 1.978457000  | 0.880653000  |
| 8  | -2.447219000 | 1.709908000  | 0.087806000  |
| 6  | 0.963412000  | 2.838973000  | 0.798227000  |
| 6  | -3.551674000 | 1.650221000  | -0.824855000 |
| 1  | 0.751506000  | 3.720731000  | 1.398804000  |
| 1  | 1.157279000  | 3.124286000  | -0.233844000 |
| 1  | 1.818648000  | 2.300676000  | 1.201345000  |
| 1  | -4.021663000 | 0.671105000  | -0.755480000 |
| 1  | -3.218247000 | 1.835990000  | -1.845070000 |
| 1  | -4.252548000 | 2.422941000  | -0.519434000 |
| 6  | 1.486927000  | -3.070036000 | -1.591233000 |
| 1  | 1.375655000  | -2.792200000 | -2.649227000 |
| 1  | 1.390367000  | -4.151606000 | -1.504588000 |
| 1  | 2.494169000  | -2.795312000 | -1.275339000 |
| 35 | -1.128519000 | -1.021499000 | 1.596163000  |
| 1  | -0.411089000 | -2.810582000 | -0.930181000 |

**16b' E1** (solvent=Chloroform, Figure 5 in the manuscript):

|   |              |              |              |
|---|--------------|--------------|--------------|
| 6 | 0.874686000  | -2.783289000 | 0.896772000  |
| 6 | 1.918059000  | -3.124710000 | 0.045103000  |
| 6 | 2.382358000  | -4.430058000 | -0.022443000 |
| 6 | 1.804902000  | -5.412355000 | 0.766784000  |
| 6 | 0.766321000  | -5.080359000 | 1.625412000  |
| 6 | 0.307573000  | -3.774546000 | 1.692523000  |
| 1 | -0.503635000 | -3.534131000 | 2.368283000  |
| 6 | 0.410468000  | -1.339567000 | 0.980149000  |
| 1 | 2.371318000  | -2.360426000 | -0.575436000 |
| 1 | 3.196972000  | -4.677822000 | -0.691104000 |
| 1 | 2.164022000  | -6.432430000 | 0.716804000  |

|    |              |              |              |
|----|--------------|--------------|--------------|
| 1  | 0.311129000  | -5.841676000 | 2.246221000  |
| 7  | 0.442310000  | -0.759098000 | 2.309262000  |
| 1  | 1.069525000  | -0.733643000 | 0.354737000  |
| 6  | -0.999807000 | -1.087745000 | 0.427478000  |
| 15 | -1.408292000 | 0.731112000  | 0.468493000  |
| 9  | -1.933544000 | -1.769238000 | 1.162086000  |
| 8  | -0.299133000 | 1.554018000  | -0.022258000 |
| 8  | -1.945681000 | 1.085616000  | 1.906084000  |
| 8  | -2.742731000 | 0.727674000  | -0.364195000 |
| 6  | -1.177126000 | 1.784632000  | 2.889280000  |
| 6  | -3.496858000 | 1.930350000  | -0.545407000 |
| 1  | -1.776334000 | 2.630149000  | 3.222867000  |
| 1  | -0.236260000 | 2.134634000  | 2.469676000  |
| 1  | -0.979452000 | 1.111003000  | 3.719251000  |
| 1  | -2.874382000 | 2.704928000  | -0.993671000 |
| 1  | -3.893067000 | 2.273804000  | 0.410358000  |
| 1  | -4.314640000 | 1.682582000  | -1.216258000 |
| 6  | 1.782065000  | -0.537742000 | 2.824678000  |
| 1  | 2.293834000  | 0.188446000  | 2.190588000  |
| 1  | 2.393002000  | -1.448505000 | 2.868350000  |
| 1  | 1.712734000  | -0.118631000 | 3.828191000  |
| 35 | -1.117122000 | -1.725092000 | -1.417650000 |
| 1  | -0.094848000 | -1.325005000 | 2.952761000  |

**16b' F1** (solvent=Chloroform, Figure 5 in the manuscript):

|    |              |              |              |
|----|--------------|--------------|--------------|
| 6  | -1.771870000 | -0.710969000 | -0.257079000 |
| 6  | -2.380354000 | -0.679075000 | -1.506124000 |
| 6  | -3.621842000 | -0.085631000 | -1.675592000 |
| 6  | -4.277042000 | 0.475929000  | -0.589777000 |
| 6  | -3.684640000 | 0.433514000  | 0.663740000  |
| 6  | -2.441807000 | -0.157545000 | 0.827734000  |
| 1  | -1.989315000 | -0.178764000 | 1.811416000  |
| 6  | -0.397079000 | -1.361362000 | -0.096187000 |
| 1  | -1.876381000 | -1.120399000 | -2.357653000 |
| 1  | -4.080145000 | -0.067198000 | -2.656341000 |
| 1  | -5.248706000 | 0.935880000  | -0.717933000 |
| 1  | -4.192129000 | 0.861089000  | 1.519394000  |
| 7  | -0.133887000 | -1.987782000 | 1.172896000  |
| 1  | -0.318655000 | -2.136086000 | -0.866487000 |
| 6  | 0.731065000  | -0.363343000 | -0.456877000 |
| 15 | 0.827219000  | 1.143372000  | 0.632359000  |
| 9  | 0.552572000  | 0.047626000  | -1.752365000 |
| 8  | 0.657486000  | 0.816867000  | 2.049692000  |
| 8  | -0.278448000 | 2.040097000  | -0.035247000 |
| 8  | 2.198350000  | 1.854925000  | 0.353312000  |
| 6  | -1.055337000 | 2.989246000  | 0.705353000  |
| 6  | 2.570134000  | 2.431529000  | -0.904923000 |
| 1  | -1.953475000 | 3.172208000  | 0.122177000  |
| 1  | -0.490150000 | 3.912913000  | 0.827242000  |

|    |              |              |              |
|----|--------------|--------------|--------------|
| 1  | -1.322542000 | 2.582978000  | 1.679631000  |
| 1  | 1.734719000  | 2.980601000  | -1.337737000 |
| 1  | 2.897129000  | 1.647642000  | -1.587465000 |
| 1  | 3.394223000  | 3.109260000  | -0.700374000 |
| 6  | -0.996952000 | -3.110782000 | 1.479507000  |
| 1  | -0.860027000 | -3.890176000 | 0.726225000  |
| 1  | -2.065951000 | -2.860895000 | 1.516156000  |
| 1  | -0.708588000 | -3.524926000 | 2.445132000  |
| 35 | 2.461652000  | -1.274966000 | -0.396721000 |
| 1  | -0.105423000 | -1.308107000 | 1.921234000  |

**16a' A2** (solvent=Chloroform, Figure 5 in the manuscript):

|    |              |              |              |
|----|--------------|--------------|--------------|
| 6  | -1.692685000 | 0.582967000  | -0.097770000 |
| 6  | -2.284522000 | 0.433216000  | 1.153868000  |
| 6  | -3.566579000 | -0.077781000 | 1.270131000  |
| 6  | -4.279978000 | -0.440894000 | 0.134512000  |
| 6  | -3.698806000 | -0.295790000 | -1.114481000 |
| 6  | -2.411544000 | 0.212219000  | -1.226867000 |
| 1  | -1.959499000 | 0.321192000  | -2.205343000 |
| 6  | -0.319941000 | 1.229969000  | -0.257065000 |
| 1  | -1.744543000 | 0.717978000  | 2.048372000  |
| 1  | -4.013099000 | -0.189888000 | 2.250027000  |
| 1  | -5.284576000 | -0.833648000 | 0.226361000  |
| 1  | -4.246468000 | -0.574014000 | -2.005895000 |
| 7  | -0.224592000 | 2.548982000  | 0.335129000  |
| 1  | -0.134595000 | 1.334678000  | -1.328066000 |
| 6  | 0.827781000  | 0.347898000  | 0.264355000  |
| 15 | 0.841469000  | -1.382572000 | -0.427133000 |
| 9  | 0.782020000  | 0.281213000  | 1.637320000  |
| 8  | 0.624323000  | -1.386902000 | -1.873014000 |
| 8  | -0.217228000 | -2.121319000 | 0.468510000  |
| 8  | 2.216229000  | -2.014622000 | -0.013146000 |
| 6  | -1.352874000 | -2.832121000 | -0.041513000 |
| 6  | 2.628453000  | -2.292107000 | 1.329933000  |
| 1  | -2.235774000 | -2.442729000 | 0.459767000  |
| 1  | -1.221158000 | -3.888179000 | 0.186231000  |
| 1  | -1.443256000 | -2.688869000 | -1.116353000 |
| 1  | 1.809304000  | -2.727250000 | 1.901027000  |
| 1  | 2.974284000  | -1.375594000 | 1.807088000  |
| 1  | 3.448314000  | -3.001520000 | 1.259018000  |
| 6  | -1.094559000 | 3.531235000  | -0.288628000 |
| 1  | -2.159084000 | 3.262579000  | -0.265065000 |
| 1  | -0.801183000 | 3.661390000  | -1.332259000 |
| 1  | -0.969057000 | 4.488004000  | 0.216980000  |
| 35 | 2.545249000  | 1.165687000  | -0.213722000 |
| 1  | -0.403262000 | 2.502444000  | 1.329286000  |

**16a' B2** (solvent=Chloroform, Figure 5 in the manuscript):

|    |              |              |              |
|----|--------------|--------------|--------------|
| 6  | -2.076732000 | 0.489053000  | -0.169593000 |
| 6  | -2.915972000 | -0.202876000 | 0.695519000  |
| 6  | -4.217397000 | -0.499589000 | 0.321187000  |
| 6  | -4.693896000 | -0.106345000 | -0.921301000 |
| 6  | -3.864155000 | 0.592599000  | -1.785515000 |
| 6  | -2.564035000 | 0.891236000  | -1.407356000 |
| 1  | -1.920900000 | 1.443269000  | -2.082731000 |
| 6  | -0.646338000 | 0.814396000  | 0.222250000  |
| 1  | -2.542051000 | -0.494992000 | 1.667534000  |
| 1  | -4.862746000 | -1.038145000 | 1.003794000  |
| 1  | -5.710940000 | -0.337520000 | -1.212082000 |
| 1  | -4.230370000 | 0.910864000  | -2.753379000 |
| 7  | -0.505714000 | 1.045166000  | 1.641810000  |
| 1  | -0.362848000 | 1.704812000  | -0.366397000 |
| 6  | 0.348717000  | -0.259579000 | -0.272056000 |
| 15 | 2.115384000  | 0.257441000  | -0.033275000 |
| 9  | 0.147714000  | -0.443915000 | -1.611760000 |
| 8  | 2.485241000  | 0.440305000  | 1.375290000  |
| 8  | 2.268231000  | 1.554490000  | -0.922092000 |
| 8  | 2.860147000  | -0.838703000 | -0.860919000 |
| 6  | 2.247829000  | 2.879779000  | -0.376723000 |
| 6  | 4.292866000  | -0.865826000 | -0.948459000 |
| 1  | 2.968084000  | 3.467266000  | -0.940335000 |
| 1  | 2.520730000  | 2.865695000  | 0.677226000  |
| 1  | 1.252053000  | 3.305579000  | -0.500895000 |
| 1  | 4.729412000  | -0.929892000 | 0.047519000  |
| 1  | 4.652805000  | 0.024691000  | -1.463541000 |
| 1  | 4.545598000  | -1.752241000 | -1.522355000 |
| 6  | -1.071170000 | 2.310902000  | 2.073426000  |
| 1  | -0.872437000 | 2.446144000  | 3.135668000  |
| 1  | -2.152986000 | 2.306110000  | 1.930311000  |
| 1  | -0.663102000 | 3.176191000  | 1.529968000  |
| 35 | 0.097654000  | -1.985257000 | 0.604625000  |
| 1  | 0.462573000  | 0.974910000  | 1.928264000  |

**16a' C2** (solvent=Chloroform, Figure 5 in the manuscript):

|   |              |              |              |
|---|--------------|--------------|--------------|
| 6 | -2.229788000 | 0.468202000  | -0.154567000 |
| 6 | -3.049969000 | -0.301380000 | 0.661732000  |
| 6 | -4.399966000 | -0.431041000 | 0.380314000  |
| 6 | -4.949899000 | 0.214574000  | -0.718094000 |
| 6 | -4.142498000 | 0.998437000  | -1.527713000 |
| 6 | -2.791773000 | 1.127200000  | -1.241213000 |
| 1 | -2.167014000 | 1.748688000  | -1.871572000 |
| 6 | -0.754628000 | 0.646827000  | 0.150903000  |
| 1 | -2.629706000 | -0.798140000 | 1.524614000  |
| 1 | -5.025491000 | -1.038382000 | 1.022169000  |
| 1 | -6.005473000 | 0.113024000  | -0.936763000 |
| 1 | -4.563767000 | 1.516348000  | -2.379967000 |
| 7 | -0.528166000 | 0.825642000  | 1.575130000  |



|    |              |              |              |
|----|--------------|--------------|--------------|
| 1  | -0.409755000 | 1.523034000  | -0.421471000 |
| 6  | 0.174223000  | -0.485640000 | -0.343270000 |
| 15 | 0.022394000  | -2.181395000 | 0.419866000  |
| 9  | 1.463201000  | -0.059687000 | -0.104913000 |
| 8  | -1.279930000 | -2.821271000 | 0.230666000  |
| 8  | 0.490253000  | -2.039510000 | 1.919228000  |
| 8  | 1.270028000  | -2.852182000 | -0.258253000 |
| 6  | -0.421216000 | -2.058974000 | 3.025985000  |
| 6  | 1.597856000  | -4.221374000 | 0.006010000  |
| 1  | 0.151383000  | -2.388392000 | 3.889324000  |
| 1  | -1.237078000 | -2.753892000 | 2.832273000  |
| 1  | -0.807723000 | -1.053133000 | 3.182570000  |
| 1  | 0.754043000  | -4.866569000 | -0.237489000 |
| 1  | 1.877133000  | -4.346195000 | 1.052504000  |
| 1  | 2.443180000  | -4.462878000 | -0.631876000 |
| 6  | -1.101886000 | 2.056325000  | 2.098210000  |
| 1  | -0.790090000 | 2.178367000  | 3.134881000  |
| 1  | -2.190432000 | 2.001784000  | 2.075612000  |
| 1  | -0.794344000 | 2.947697000  | 1.533537000  |
| 35 | -0.002079000 | -0.694361000 | -2.276929000 |
| 1  | 0.466748000  | 0.823023000  | 1.754748000  |

**16b' D2** (solvent=Chloroform, Figure 5 in the manuscript):

|    |              |              |              |
|----|--------------|--------------|--------------|
| 6  | 1.751067000  | -0.357853000 | -0.340568000 |
| 6  | 2.274919000  | -0.650429000 | 0.915481000  |
| 6  | 3.470019000  | -0.085644000 | 1.331313000  |
| 6  | 4.167998000  | 0.771345000  | 0.490926000  |
| 6  | 3.660354000  | 1.060739000  | -0.765429000 |
| 6  | 2.459553000  | 0.499170000  | -1.174845000 |
| 1  | 2.062169000  | 0.734577000  | -2.154455000 |
| 6  | 0.476769000  | -1.017915000 | -0.855331000 |
| 1  | 1.753230000  | -1.327955000 | 1.579312000  |
| 1  | 3.861063000  | -0.320660000 | 2.313088000  |
| 1  | 5.105021000  | 1.206456000  | 0.814401000  |
| 1  | 4.198747000  | 1.722915000  | -1.431508000 |
| 7  | 0.459838000  | -2.464091000 | -0.789030000 |
| 1  | 0.393652000  | -0.750624000 | -1.913454000 |
| 6  | -0.827761000 | -0.448571000 | -0.270539000 |
| 15 | -0.956441000 | 1.406528000  | -0.339242000 |
| 9  | -1.865827000 | -0.898841000 | -1.049511000 |
| 8  | -0.561104000 | 1.890446000  | -1.665699000 |
| 8  | -0.155737000 | 1.923807000  | 0.898168000  |
| 8  | -2.432759000 | 1.710195000  | 0.104352000  |
| 6  | 0.962788000  | 2.817236000  | 0.818899000  |
| 6  | -3.541477000 | 1.669440000  | -0.804630000 |
| 1  | 0.718258000  | 3.704980000  | 1.398171000  |
| 1  | 1.167610000  | 3.086670000  | -0.215267000 |
| 1  | 1.824026000  | 2.308938000  | 1.246956000  |
| 1  | -4.018930000 | 0.693323000  | -0.744804000 |
| 1  | -3.210475000 | 1.864068000  | -1.823959000 |

|    |              |              |              |
|----|--------------|--------------|--------------|
| 1  | -4.234815000 | 2.444163000  | -0.487344000 |
| 6  | 1.468073000  | -3.093729000 | -1.625190000 |
| 1  | 1.269013000  | -2.857799000 | -2.672568000 |
| 1  | 1.402032000  | -4.174684000 | -1.506471000 |
| 1  | 2.495478000  | -2.781016000 | -1.395752000 |
| 35 | -1.195365000 | -1.084557000 | 1.548189000  |
| 1  | 0.555697000  | -2.773383000 | 0.169154000  |

**16b' E2** (solvent=Chloroform, Figure 5 in the manuscript):

|    |              |              |              |
|----|--------------|--------------|--------------|
| 6  | 0.923274000  | -2.588708000 | 0.968192000  |
| 6  | 1.937155000  | -2.921099000 | 0.079771000  |
| 6  | 2.401560000  | -4.225283000 | -0.008155000 |
| 6  | 1.852996000  | -5.210842000 | 0.797779000  |
| 6  | 0.846255000  | -4.883165000 | 1.695907000  |
| 6  | 0.387658000  | -3.578665000 | 1.785011000  |
| 1  | -0.380984000 | -3.317431000 | 2.499659000  |
| 6  | 0.429260000  | -1.156874000 | 1.060345000  |
| 1  | 2.367333000  | -2.152332000 | -0.551758000 |
| 1  | 3.194151000  | -4.469515000 | -0.704117000 |
| 1  | 2.213049000  | -6.229886000 | 0.732489000  |
| 1  | 0.419513000  | -5.647166000 | 2.333661000  |
| 7  | 0.407088000  | -0.718486000 | 2.445112000  |
| 1  | 1.096656000  | -0.537522000 | 0.439514000  |
| 6  | -0.973348000 | -0.959346000 | 0.442057000  |
| 15 | -1.533106000 | 0.814715000  | 0.400055000  |
| 9  | -1.927120000 | -1.617852000 | 1.172226000  |
| 8  | -1.606038000 | 1.397423000  | 1.746368000  |
| 8  | -2.884255000 | 0.844936000  | -0.401325000 |
| 8  | -0.491486000 | 1.432151000  | -0.591870000 |
| 6  | -4.159086000 | 0.664259000  | 0.233564000  |
| 6  | -0.444750000 | 2.845600000  | -0.840689000 |
| 1  | -4.889802000 | 1.174816000  | -0.387740000 |
| 1  | -4.150792000 | 1.095201000  | 1.233503000  |
| 1  | -4.389833000 | -0.398837000 | 0.282841000  |
| 1  | -0.361666000 | 3.391058000  | 0.098640000  |
| 1  | -1.338273000 | 3.156800000  | -1.380914000 |
| 1  | 0.436245000  | 3.018497000  | -1.451453000 |
| 6  | 1.736896000  | -0.559677000 | 3.006517000  |
| 1  | 2.382792000  | 0.104496000  | 2.412843000  |
| 1  | 2.231880000  | -1.529477000 | 3.080611000  |
| 1  | 1.650295000  | -0.147869000 | 4.011387000  |
| 35 | -1.038463000 | -1.685338000 | -1.372318000 |
| 1  | -0.115982000 | 0.143401000  | 2.536976000  |

**16b' F2** (solvent=Chloroform, Figure 5 in the manuscript):

|   |              |              |              |
|---|--------------|--------------|--------------|
| 6 | -1.890810000 | -0.803881000 | -0.385280000 |
| 6 | -2.538873000 | -0.821519000 | -1.614261000 |
| 6 | -3.822593000 | -0.314160000 | -1.744736000 |

|    |              |              |              |
|----|--------------|--------------|--------------|
| 6  | -4.476961000 | 0.205622000  | -0.638355000 |
| 6  | -3.840319000 | 0.214072000  | 0.594543000  |
| 6  | -2.554763000 | -0.286231000 | 0.719524000  |
| 1  | -2.058182000 | -0.276961000 | 1.679885000  |
| 6  | -0.487090000 | -1.378886000 | -0.277866000 |
| 1  | -2.034820000 | -1.235890000 | -2.479356000 |
| 1  | -4.313158000 | -0.331728000 | -2.709688000 |
| 1  | -5.481427000 | 0.598241000  | -0.734787000 |
| 1  | -4.346294000 | 0.615423000  | 1.463557000  |
| 7  | -0.233975000 | -1.959276000 | 1.024586000  |
| 1  | -0.392159000 | -2.123996000 | -1.083669000 |
| 6  | 0.599677000  | -0.330875000 | -0.608171000 |
| 15 | 0.854604000  | 1.068034000  | 0.601117000  |
| 9  | 0.297966000  | 0.241641000  | -1.807602000 |
| 8  | -0.355048000 | 1.852028000  | 0.855267000  |
| 8  | 2.028975000  | 1.806936000  | -0.134596000 |
| 8  | 1.537074000  | 0.455377000  | 1.881112000  |
| 6  | 2.493968000  | 3.079221000  | 0.332675000  |
| 6  | 0.836081000  | 0.301101000  | 3.124544000  |
| 1  | 3.227513000  | 3.421954000  | -0.391341000 |
| 1  | 2.963686000  | 2.970701000  | 1.310726000  |
| 1  | 1.667401000  | 3.786809000  | 0.389189000  |
| 1  | 0.187447000  | -0.571390000 | 3.063817000  |
| 1  | 0.250481000  | 1.192842000  | 3.340397000  |
| 1  | 1.598584000  | 0.159674000  | 3.885969000  |
| 6  | -1.015050000 | -3.160018000 | 1.283363000  |
| 1  | -0.910319000 | -3.916609000 | 0.493560000  |
| 1  | -2.071981000 | -2.909171000 | 1.372705000  |
| 1  | -0.689682000 | -3.595663000 | 2.227254000  |
| 35 | 2.311685000  | -1.281389000 | -0.862167000 |
| 1  | 0.748688000  | -2.188759000 | 1.098561000  |
